# Supplementary material for: Salivary miRNAs as non-invasive biomarkers of hepatocellular carcinoma: a pilot study
Source: PeerJ journal article supplement (doi:10.7717/peerj.12715), 2022-01-05
Supplement: supplemental_tables.xlsx [file supplemental_tables.xlsx]

## Sheet: Supplementary Table 1
Supplementary Table 1. Treatment history and staging of patients with hepatocellular carcinoma.
Sample	Prior Treatments	Cirrhosis or Fibrosis	Child Pugh Score	Child Pugh Class	BCLC Stage	AJCC Stage	Within Milan Criteria
ID_13	None	Fibrosis	5	A	A	2	Yes
ID_2	SBRT, Nivolumab, Y90	Cirrhosis	6	A	A	N/A	No
ID_35	Microwave Ablation	Cirrhosis	5	A	0	1A	Yes
ID_6	None	Cirrhosis	5	A	B	2	No
ID_16	None	-	5	A	A	1B	Yes
ID_24	Y90	Cirrhosis	9	B	A	N/A	No
ID_8	Resection	-	5	A	B	3A	No
ID_20	Y90	-	6	A	B	3A	No
ID_3	Microwave Ablation, Liver Transplant, Y90	Cirrhosis	5	A	B	2	Yes
ID_9	Palliative Treatment with Lenvatinib And Ramucirumab	-	5	A	C	4B	No
ID_15	Y90, Liver Transplant	Cirrhosis	8	B	A	N/A	Yes
ID_18	Chemoembolization	Cirrhosis	11	C	D	2	Yes
ID_12	Y90	-	5	A	A	N/A	No
ID_26	Radioembolization, Lenvatinib	-	5	A	B	4B	No
ID_19	None	Fibrosis	5	A	A	1B	Yes
ID_27	Y90	-	6	A	A	N/A	Yes
ID_25	Embolization	Cirrhosis	5	A	A	3A	No
ID_38	None	Cirrhosis	5	A	A	2	Yes
ID_23	None	-	5	A	A	2	Yes
ID_11	Tacex2, Bland Embolization	Cirrhosis	8	B	A	3	Yes

## Sheet: Supplementary Table 2
Supplementary Table 2. SVM modeling parameters
Cohort	Covariates Included	sigma	C
Whole	No	3.50	0.25
Whole	Yes	0.06	0.25
Chronic liver disease subset	No	4.00	2.00
Chronic liver disease subset	Yes	0.09	0.50

## Sheet: Supplementary Table 3
Supplementary Table 3. Salivary miRNAs differentially expressed between all patients with HCC (n=20) and those with cirrhosis only (n=19) (FDR P <.05)
miRNA	Log2 FC	Log2 FC SE	P value	FDR P value
hsa-miR-3198	-5.01367	1.50048	5.95932e-09	6.80944e-06
hsa-mir-3198-2	-5.00999	1.50754	6.557e-09	6.80944e-06
hsa-miR-1246	-6.85546	1.46119	1.17866e-08	7.9843e-06
hsa-mir-1246	-6.02994	1.57267	1.53766e-08	7.9843e-06
hsa-mir-766	-5.04592	1.79459	3.503e-08	1.24299e-05
hsa-mir-3648-2	-7.09567	1.94439	3.59073e-08	1.24299e-05
hsa-mir-1290	-8.23525	1.84355	1.00398e-07	2.60658e-05
hsa-miR-1290	-8.23525	1.84355	1.00398e-07	2.60658e-05
hsa-miR-766-3p	-5.00267	2.28452	3.22273e-07	7.30843e-05
hsa-mir-3648-1	-8.9419	2.61345	3.51874e-07	7.30843e-05
hsa-miR-191-3p	-2.67399	1.15454	7.46878e-07	0.000129492
hsa-mir-10401	-9.85164	3.363	7.48151e-07	0.000129492
hsa-mir-133a-2	-4.93798	1.20903	9.70157e-07	0.000147773
hsa-miR-133a-3p	-5.10962	1.28419	9.9606e-07	0.000147773
hsa-mir-3615	-4.08371	1.44422	1.56926e-06	0.000203709
hsa-miR-3615	-4.08371	1.44422	1.56926e-06	0.000203709
hsa-miR-454-5p	-2.53005	0.941608	1.6986e-06	0.000207529
hsa-miR-4449	-3.05536	2.09044	2.74728e-06	0.000317006
hsa-miR-642a-3p	-0.613018	1.13049	3.25177e-06	0.000337696
hsa-miR-642b-5p	-0.613018	1.13049	3.25177e-06	0.000337696
hsa-mir-122	-4.87779	1.38031	4.02687e-06	0.000356758
hsa-mir-122b	-4.86551	1.38569	4.20743e-06	0.000356758
hsa-miR-122-5p	-4.8652	1.38615	4.23781e-06	0.000356758
hsa-miR-122b-3p	-4.8652	1.38615	4.23781e-06	0.000356758
hsa-mir-642a	-0.595613	1.10491	4.49957e-06	0.000356758
hsa-mir-642b	-0.595613	1.10491	4.49957e-06	0.000356758
hsa-mir-6504	-3.60897	1.54955	4.63768e-06	0.000356758
hsa-mir-8059	-1.90807	1.87089	6.51907e-06	0.000483575
hsa-mir-1180	-1.14035	1.5853	6.81824e-06	0.000488327
hsa-miR-8059	-1.77523	1.71404	8.4892e-06	0.000587736
hsa-miR-148a-5p	-0.850977	0.885926	9.35402e-06	0.000626719
hsa-mir-1306	-3.88603	2.44527	1.01943e-05	0.000661673
hsa-miR-1180-3p	-1.01019	1.42778	1.06424e-05	0.000669829
hsa-mir-603	-3.9301	1.91435	1.1764e-05	0.000703256
hsa-miR-643	-0.74624	1.00773	1.20679e-05	0.000703256
hsa-mir-6806	-6.26727	2.46207	1.25001e-05	0.000703256
hsa-mir-138-1	-0.496146	1.01775	1.25279e-05	0.000703256
hsa-miR-6504-5p	-2.84301	1.98763	1.37922e-05	0.000753854
hsa-miR-10401-3p	-8.10674	4.30122	1.42253e-05	0.000757586
hsa-mir-212	-0.518567	1.07871	1.53256e-05	0.000795781
hsa-mir-4326	-0.770525	1.21507	1.57549e-05	0.00079812
hsa-mir-761	-4.13491	1.52556	1.80397e-05	0.000871359
hsa-miR-761	-4.13491	1.52556	1.80397e-05	0.000871359
hsa-miR-4326	-0.697362	1.17156	2.06122e-05	0.00097299
hsa-miR-6839-5p	-1.38229	2.23087	2.28678e-05	0.00105548
hsa-let-7e-3p	0.0905641	0.908155	2.40572e-05	0.00108624
hsa-miR-212-5p	-0.455601	1.06388	2.46819e-05	0.00109073
hsa-miR-138-5p	-0.75323	1.08643	2.68371e-05	0.00116126
hsa-mir-92b	-1.42187	2.01069	3.14569e-05	0.00133339
hsa-mir-10397	-0.627407	1.13011	3.60062e-05	0.0014957
hsa-miR-1306-5p	-3.69253	3.00545	3.97605e-05	0.00157314
hsa-miR-6806-5p	-3.94391	2.68426	3.99553e-05	0.00157314
hsa-mir-184	-0.955414	1.44828	4.128e-05	0.00157314
hsa-miR-184	-0.955414	1.44828	4.128e-05	0.00157314
hsa-mir-320d-2	-2.30042	1.3172	4.17854e-05	0.00157314
hsa-miR-146b-3p	-1.31678	1.54801	4.2415e-05	0.00157314
hsa-mir-4765	-0.585752	1.09055	4.41101e-05	0.00160194
hsa-mir-3684	-1.41251	2.19419	4.47339e-05	0.00160194
hsa-miR-127-3p	-0.956234	1.52608	4.91007e-05	0.00172851
hsa-miR-125a-5p	-2.58847	0.809926	5.69154e-05	0.00197022
hsa-miR-664b-3p	-1.05907	0.946435	5.87995e-05	0.00199488
hsa-let-7a-2-3p	-0.152493	0.883009	6.13188e-05	0.00199488
hsa-miR-5187-5p	-1.81505	2.16799	6.23578e-05	0.00199488
hsa-miR-92b-3p	-1.19666	1.62757	6.44092e-05	0.00199488
hsa-mir-134	-0.70662	1.23817	6.467e-05	0.00199488
hsa-mir-127	-0.801317	1.32328	6.49401e-05	0.00199488
hsa-mir-6839	-5.04699	3.8346	6.61135e-05	0.00199488
hsa-mir-1181	-2.58639	3.11195	6.74661e-05	0.00199488
hsa-mir-1287	-0.551749	0.889758	6.76011e-05	0.00199488
hsa-miR-18a-3p	-0.524931	1.13514	6.82255e-05	0.00199488
hsa-mir-484	-2.39845	1.63533	6.9494e-05	0.00199488
hsa-miR-484	-2.39845	1.63533	6.9494e-05	0.00199488
hsa-mir-6514	-0.638296	1.22686	7.01138e-05	0.00199488
hsa-miR-10397-5p	-0.618374	1.14149	7.20552e-05	0.00202143
hsa-mir-138-2	-0.526001	1.04256	7.29933e-05	0.00202143
hsa-mir-125a	-2.53008	0.813323	7.85827e-05	0.00212464
hsa-miR-12136	-2.9238	1.05145	7.9438e-05	0.00212464
hsa-miR-769-3p	-0.434661	0.851214	7.97889e-05	0.00212464
hsa-miR-548h-5p	-0.547734	1.19185	8.29134e-05	0.00217989
hsa-miR-3648	-8.09259	3.7513	9.23434e-05	0.00239747
hsa-mir-548h-4	-0.345487	1.03697	9.68718e-05	0.00248398
hsa-mir-4449	-2.09344	2.68306	0.000103998	0.00261224
hsa-miR-130b-5p	-0.727126	0.864019	0.00010653	0.00261224
hsa-mir-7706	-0.355757	1.00933	0.000106904	0.00261224
hsa-miR-7706	-0.355757	1.00933	0.000106904	0.00261224
hsa-miR-3684	-0.023757	0.950566	0.000124621	0.00300975
hsa-mir-376c	-0.09809	0.938012	0.000126107	0.00301062
hsa-mir-4492	-7.03822	2.72378	0.00013053	0.0030808
hsa-miR-4492	-7.34743	2.9899	0.000136281	0.00318041
hsa-mir-10398	-0.749005	1.24561	0.000140159	0.00323457
hsa-mir-12136	-2.69793	1.01978	0.000169903	0.0038779
hsa-mir-3928	-0.381593	1.01428	0.000182152	0.00407104
hsa-miR-330-5p	-0.418805	0.857	0.000184217	0.00407104
hsa-mir-4465	-4.51849	3.34137	0.000184245	0.00407104
hsa-mir-4521	-0.316337	1.01545	0.000186589	0.00407942
hsa-mir-664b	-1.39207	0.71323	0.000190248	0.00411609
hsa-miR-3928-3p	-0.371233	1.01331	0.00020465	0.00438014
hsa-mir-6869	-0.329994	1.01947	0.00020667	0.00438014
hsa-miR-10398-3p	-0.841167	1.44166	0.000213676	0.00448288
hsa-miR-6869-5p	-0.29037	1.00645	0.000218477	0.00450795
hsa-miR-134-5p	-0.639521	1.23347	0.000219408	0.00450795
hsa-miR-3173-5p	-0.665328	1.20279	0.000221382	0.00450795
hsa-mir-6894	-0.782191	1.3815	0.000225593	0.00454909
hsa-mir-5187	-1.42578	1.76579	0.000228993	0.00457326
hsa-mir-548h-3	-0.310002	1.04129	0.000237262	0.00466953
hsa-miR-190b-5p	-2.47738	1.00286	0.00023831	0.00466953
hsa-mir-643	0.0266271	0.781577	0.000241325	0.00468442
hsa-mir-190b	-2.46804	1.00279	0.000247158	0.00475322
hsa-miR-618	-1.31546	1.56528	0.000256219	0.0047893
hsa-mir-1271	-0.500543	0.912161	0.000257421	0.0047893
hsa-miR-1271-5p	-0.500543	0.912161	0.000257421	0.0047893
hsa-mir-3136	-0.264374	0.907538	0.000260564	0.0047893
hsa-miR-3136-5p	-0.264374	0.907538	0.000260564	0.0047893
hsa-mir-618	-1.30319	1.55403	0.000269798	0.00491553
hsa-mir-194-1	-0.568639	0.808298	0.000275294	0.00497204
hsa-miR-30a-3p	-2.28638	1.0343	0.000294754	0.00526721
hsa-mir-514a-1	-0.516915	1.06938	0.000296709	0.00526721
hsa-mir-325	-7.90807	2.93265	0.000299741	0.00527273
hsa-mir-4785	0.0207191	0.934954	0.000307035	0.00527273
hsa-miR-4785	0.0207191	0.934954	0.000307035	0.00527273
hsa-miR-1306-3p	-0.983738	1.4494	0.000309333	0.00527273
hsa-mir-2110	-1.90674	1.78295	0.000309712	0.00527273
hsa-miR-1293	0.0613943	0.868913	0.000316599	0.00531481
hsa-miR-10399-3p	-0.93923	1.08658	0.000317302	0.00531481
hsa-miR-6894-5p	-0.608613	1.23313	0.000322154	0.00532526
hsa-miR-641	-0.0501612	0.9141	0.000323054	0.00532526
hsa-mir-548i-1	-4.40951	3.40249	0.000329922	0.00539565
hsa-mir-548h-1	-0.362392	1.08308	0.000333811	0.00540707
hsa-miR-3150b-3p	-1.31686	1.0047	0.000339481	0.00540707
hsa-miR-3150a-5p	-1.31686	1.0047	0.000339481	0.00540707
hsa-mir-409	-0.0316186	0.964241	0.000341033	0.00540707
hsa-mir-1255a	-0.535649	0.95063	0.000347084	0.00546131
hsa-mir-5001	-1.12564	1.81879	0.000366039	0.0056736
hsa-miR-5001-3p	-1.12564	1.81879	0.000366039	0.0056736
hsa-mir-3173	-0.503862	1.05842	0.00037497	0.00568625
hsa-mir-382	-0.378926	1.02512	0.000377032	0.00568625
hsa-miR-4521	-0.310436	1.02878	0.00037907	0.00568625
hsa-mir-6803	-0.590436	1.21327	0.000380543	0.00568625
hsa-miR-6803-3p	-0.590436	1.21327	0.000380543	0.00568625
hsa-mir-3660	-0.464074	0.963244	0.000385516	0.0057194
hsa-mir-641	0.0716919	0.777215	0.000411459	0.00600734
hsa-miR-183-3p	0.00135515	0.871051	0.000416117	0.00600734
hsa-mir-3064	-0.093912	0.859785	0.000416782	0.00600734
hsa-mir-548i-2	-4.88501	2.25132	0.000418083	0.00600734
hsa-miR-671-3p	-0.678659	1.15211	0.000419386	0.00600734
hsa-mir-9902-1	-1.07218	1.86791	0.000427424	0.00603918
hsa-mir-9902-2	-1.07218	1.86791	0.000427424	0.00603918
hsa-miR-1287-5p	0.00685246	0.836539	0.000450446	0.00632146
hsa-miR-3064-5p	-0.157728	0.88631	0.000499764	0.00696651
hsa-miR-6516-3p	-0.151416	0.85291	0.000519649	0.0071954
hsa-mir-4766	-0.12272	0.928363	0.000538477	0.00740111
hsa-mir-7155	0.1522	0.932184	0.000541632	0.00740111
hsa-mir-3655	-1.06514	1.70664	0.0005563	0.00752414
hsa-mir-30d	-1.2028	0.42966	0.000557881	0.00752414
hsa-miR-30d-5p	-1.21321	0.435382	0.000564022	0.0075579
hsa-mir-7850	-0.789634	1.2325	0.000592946	0.00789455
hsa-mir-323a	-0.348706	1.08631	0.000626168	0.00828376
hsa-mir-6511a-3	-0.4999	1.09758	0.00063349	0.00832758
hsa-mir-381	-0.598298	1.13775	0.000649864	0.00848911
hsa-mir-320b-1	-1.02854	1.16472	0.000657861	0.00853985
hsa-miR-874-3p	-0.34936	0.93763	0.000672193	0.00859863
hsa-mir-6788	-0.781854	1.40147	0.000674808	0.00859863
hsa-miR-6788-5p	-0.781854	1.40147	0.000674808	0.00859863
hsa-miR-885-5p	-0.510226	1.10055	0.000688693	0.00872204
hsa-miR-3605-3p	-0.552131	1.18065	0.000693444	0.00872899
hsa-mir-196a-2	-1.79657	2.42523	0.000698005	0.00873348
hsa-miR-1537-5p	-0.0814015	0.935247	0.000715339	0.00889676
hsa-mir-874	-0.754115	1.2272	0.000725423	0.00896847
hsa-mir-3605	-1.12025	1.72692	0.000740071	0.0090108
hsa-miR-93-3p	-1.9018	1.20639	0.000741074	0.0090108
hsa-miR-181c-3p	-1.32067	0.886721	0.000741862	0.0090108
hsa-mir-411	-0.073306	0.992485	0.000773525	0.00930839
hsa-mir-514a-2	-0.0751801	0.970342	0.000785594	0.00930839
hsa-mir-514a-3	-0.0751801	0.970342	0.000785594	0.00930839
hsa-miR-6894-3p	-0.609345	1.23006	0.000787083	0.00930839
hsa-miR-339-5p	-1.71579	1.52072	0.000793452	0.00930839
hsa-mir-320e	-0.0863006	0.984293	0.00080172	0.00930839
hsa-miR-320e	-0.0863006	0.984293	0.00080172	0.00930839
hsa-mir-548l	-0.36839	0.946949	0.000806697	0.00930839
hsa-miR-548l	-0.36839	0.946949	0.000806697	0.00930839
hsa-mir-339	-1.69766	1.47848	0.000813949	0.00934018
hsa-mir-6818	-0.333965	0.890105	0.000837527	0.00955793
hsa-miR-342-3p	-1.92696	0.928155	0.000856077	0.00971624
hsa-mir-296	-0.276877	1.03916	0.000867056	0.00978737
hsa-miR-942-5p	-1.43325	1.16606	0.000888924	0.00993674
hsa-miR-664b-5p	-1.07708	0.918515	0.000889857	0.00993674
hsa-miR-34c-3p	-0.47421	1.14316	0.000900801	0.00997407
hsa-miR-4765	-0.187321	0.984092	0.000902804	0.00997407
hsa-miR-25-5p	-0.277509	0.93501	0.000911583	0.0100178
hsa-mir-4659a	-0.775001	1.11968	0.00095675	0.010404
hsa-mir-4659b	-0.775001	1.11968	0.00095675	0.010404
hsa-mir-1-1	-1.89603	1.68776	0.000975389	0.0105515
hsa-miR-3609	-0.584313	1.07478	0.00101647	0.0108916
hsa-mir-10399	-0.767502	0.924459	0.00101732	0.0108916
hsa-miR-320c	-0.704497	1.09847	0.00104232	0.0111021
hsa-miR-3613-3p	-0.15205	0.876782	0.00105985	0.0112312
hsa-mir-34b	-1.829	2.13999	0.00107187	0.0113008
hsa-miR-625-3p	-1.48397	0.857574	0.00108939	0.0114276
hsa-mir-378i	-0.37122	0.755281	0.00109854	0.0114656
hsa-mir-3157	0.534681	1.09332	0.00111982	0.0116162
hsa-miR-505-5p	-1.98156	1.9844	0.00112587	0.0116162
hsa-mir-3609	-0.539247	1.04459	0.00112974	0.0116162
hsa-mir-1270	-0.721031	1.26146	0.00113987	0.0116627
hsa-miR-188-3p	-0.0753915	0.934712	0.00115909	0.0117566
hsa-miR-1843	-0.477279	0.68809	0.00116038	0.0117566
hsa-mir-30a	-1.81916	0.931512	0.00117422	0.0118391
hsa-miR-4487	-0.894319	1.40505	0.00117996	0.0118395
hsa-mir-671	-1.13892	1.10463	0.00121894	0.0121718
hsa-miR-10b-5p	-1.87894	1.59836	0.00122997	0.0122133
hsa-mir-1294	-0.41276	1.01436	0.00123649	0.0122133
hsa-mir-548t	-0.196395	0.964596	0.00124662	0.0122133
hsa-miR-548t-5p	-0.196395	0.964596	0.00124662	0.0122133
hsa-mir-320c-1	0.166208	0.946356	0.00136647	0.0132296
hsa-mir-10b	-1.85432	1.57589	0.00137476	0.0132296
hsa-mir-1249	-0.100442	0.989447	0.00137582	0.0132296
hsa-miR-1249-3p	-0.100442	0.989447	0.00137582	0.0132296
hsa-mir-942	-1.31042	1.12769	0.0014025	0.0134239
hsa-miR-1-3p	-1.95569	1.73746	0.00141533	0.0134711
hsa-miR-1976	-0.927553	1.06914	0.0014204	0.0134711
hsa-miR-550b-3p	-0.515182	1.09773	0.0014805	0.0139574
hsa-mir-342	-1.805	0.919032	0.00149142	0.0139574
hsa-miR-576-5p	-1.03159	0.547562	0.00149183	0.0139574
hsa-miR-10396a-5p	-0.682692	1.35201	0.0015035	0.0140035
hsa-miR-4773	-0.755227	1.27429	0.00152109	0.014104
hsa-mir-576	-1.02813	0.54702	0.00152915	0.0141158
hsa-miR-320a-5p	-0.347743	1.09223	0.0015574	0.0142352
hsa-mir-4791	-0.328824	0.92599	0.00156431	0.0142352
hsa-miR-4791	-0.328824	0.92599	0.00156431	0.0142352
hsa-mir-6513	-0.0761679	0.898236	0.0015695	0.0142352
hsa-miR-625-5p	-1.3599	0.892134	0.00158564	0.014319
hsa-mir-4690	-0.254174	1.03613	0.00161806	0.0145486
hsa-miR-409-3p	0.0437606	0.968879	0.00164369	0.014662
hsa-miR-550a-5p	-0.478512	1.06894	0.0016448	0.014662
hsa-mir-3128	0.26615	0.948536	0.00174203	0.0154624
hsa-mir-548i-3	-5.37176	3.81115	0.00175959	0.0155518
hsa-mir-625	-1.61768	0.851518	0.00177041	0.0155811
hsa-mir-505	-1.96033	1.19786	0.00179985	0.0157734
hsa-miR-7850-5p	-0.632266	1.14849	0.00182847	0.0159526
hsa-miR-574-5p	-0.0708313	0.89334	0.00183567	0.0159526
hsa-miR-6818-3p	-0.374991	0.935508	0.00190024	0.016445
hsa-miR-361-3p	-1.34577	0.9687	0.00191445	0.0164992
hsa-mir-10527	0.0190783	0.931972	0.00192422	0.0165149
hsa-mir-151b	0.0432721	0.976908	0.0019572	0.0166443
hsa-miR-151b	0.0432721	0.976908	0.0019572	0.0166443
hsa-miR-326	-0.840466	1.15036	0.00196333	0.0166443
hsa-mir-27b	1.13216	0.450404	0.00198076	0.0166785
hsa-miR-27b-3p	1.13207	0.450431	0.00198344	0.0166785
hsa-mir-597	-0.155521	0.975807	0.00200258	0.0167358
hsa-mir-4773-1	-0.665025	1.17138	0.00201442	0.0167358
hsa-mir-4773-2	-0.665025	1.17138	0.00201442	0.0167358
hsa-mir-6516	0.0329545	0.830083	0.00205121	0.016892
hsa-miR-549a-5p	0.241959	0.95541	0.00206055	0.016892
hsa-mir-550b-2	-0.533952	1.04264	0.00207963	0.016892
hsa-mir-550a-2	-0.533952	1.04264	0.00207963	0.016892
hsa-mir-3927	0.357154	1.01453	0.00208201	0.016892
hsa-miR-3927-3p	0.357154	1.01453	0.00208201	0.016892
hsa-let-7c-3p	0.361448	0.956418	0.0020964	0.0169425
hsa-miR-597-5p	-0.222363	1.0216	0.00210937	0.0169812
hsa-miR-10527-5p	0.0180819	0.934107	0.00213455	0.0170969
hsa-miR-17-5p	-0.343591	0.518459	0.00214477	0.0170969
hsa-miR-296-5p	-0.234698	1.03194	0.00215245	0.0170969
hsa-miR-549a-3p	0.387553	0.924666	0.00215667	0.0170969
hsa-miR-6727-5p	-0.916561	1.37004	0.00221882	0.0174256
hsa-miR-106a-3p	0.0928133	0.916807	0.00222649	0.0174256
hsa-mir-3138	0.00570793	0.943533	0.00223013	0.0174256
hsa-miR-454-3p	0.297486	0.579786	0.00223169	0.0174256
hsa-mir-1226	-0.0545514	0.963175	0.00226969	0.0175901
hsa-miR-1226-3p	-0.0545514	0.963175	0.00226969	0.0175901
hsa-miR-23a-5p	0.109231	0.887667	0.00231793	0.0178277
hsa-miR-1284	-0.185672	0.967155	0.00231966	0.0178277
hsa-miR-548aw	0.353292	1.03361	0.00232695	0.0178277
hsa-mir-3150a	-0.925857	1.10669	0.00233468	0.0178277
hsa-miR-26a-1-3p	0.290459	0.916476	0.00235326	0.0179037
hsa-miR-186-3p	-0.317191	0.868582	0.00237539	0.0179741
hsa-mir-320b-2	-0.978433	1.08863	0.00239162	0.0179741
hsa-miR-4662b	0.376325	0.972159	0.00240292	0.0179741
hsa-miR-4662a-5p	0.376325	0.972159	0.00240292	0.0179741
hsa-miR-6842-3p	-0.127004	0.86871	0.0024089	0.0179741
hsa-mir-6842	-0.14301	0.870108	0.00241443	0.0179741
hsa-miR-589-5p	-0.740608	0.748117	0.00243128	0.0180349
hsa-mir-10396a	-0.549495	1.17006	0.00244447	0.0180426
hsa-miR-501-3p	-0.582972	0.676339	0.00245157	0.0180426
hsa-miR-3138	0.018423	0.944718	0.00245838	0.0180426
hsa-mir-3679	0.341685	0.936068	0.002483	0.0181212
hsa-miR-9902	-0.90876	1.63069	0.00248654	0.0181212
hsa-miR-34a-3p	-0.52253	0.749794	0.00256217	0.0186071
hsa-miR-323a-3p	-0.219567	1.04126	0.00258294	0.018643
hsa-miR-3611	-0.294586	0.850329	0.00258916	0.018643
hsa-mir-4698	-0.875305	1.43467	0.00259404	0.018643
hsa-mir-181a-2	-1.47539	0.788744	0.0026163	0.0187381
hsa-mir-3611	-0.292274	0.850242	0.00265976	0.0189839
hsa-miR-4775	0.395839	1.0147	0.00269744	0.0191701
hsa-miR-671-5p	-0.796613	0.980985	0.00270941	0.0191701
hsa-miR-27b-5p	0.185358	0.95302	0.00271354	0.0191701
hsa-mir-548j	-0.864897	0.90193	0.00279447	0.0194869
hsa-mir-4662b	0.38293	0.976221	0.00279511	0.0194869
hsa-mir-4662a	0.38293	0.976221	0.00279511	0.0194869
hsa-miR-9-5p	-2.09373	1.01227	0.00279591	0.0194869
hsa-mir-6895	-0.604735	1.21838	0.00281223	0.0195351
hsa-miR-629-3p	-0.533151	0.974579	0.00282712	0.0195731
hsa-miR-106b-3p	-1.53335	1.23563	0.00285832	0.0197079
hsa-miR-378i	-0.121572	0.738191	0.00286556	0.0197079
hsa-miR-146a-3p	-0.0493883	0.961931	0.00299955	0.0205096
hsa-mir-1278	-0.0102804	0.955287	0.00301176	0.0205096
hsa-miR-1278	-0.0102804	0.955287	0.00301176	0.0205096
hsa-mir-320d-1	-0.129346	0.825293	0.00304147	0.0206442
hsa-miR-30c-1-3p	0.0175856	0.86878	0.00307577	0.020809
hsa-miR-1277-3p	-0.0118823	0.828121	0.00309144	0.0208471
hsa-miR-455-3p	-0.169132	0.867764	0.00313844	0.0210816
hsa-mir-135a-1	0.106006	0.907244	0.00314651	0.0210816
hsa-miR-34b-3p	-0.693793	1.29811	0.00318771	0.021289
hsa-mir-3148	-0.31986	1.04866	0.00321015	0.0213019
hsa-miR-3148	-0.31986	1.04866	0.00321015	0.0213019
hsa-mir-135a-2	0.262603	0.8383	0.00326882	0.0216103
hsa-mir-4775	0.51094	1.05644	0.00327744	0.0216103
hsa-miR-3679-5p	0.303753	0.945968	0.00329644	0.0216668
hsa-mir-1-2	-1.48797	1.53223	0.00332899	0.0216805
hsa-mir-5695	-0.686979	1.28187	0.00334463	0.0216805
hsa-mir-5008	0.00579405	0.974673	0.00334595	0.0216805
hsa-mir-449a	-1.34636	1.78775	0.00335202	0.0216805
hsa-miR-140-5p	0.136321	0.60155	0.00336368	0.0216805
hsa-mir-216a	0.203361	0.953963	0.00337534	0.0216805
hsa-miR-216a-5p	0.203361	0.953963	0.00337534	0.0216805
hsa-miR-450a-2-3p	-0.0608863	0.954051	0.00338203	0.0216805
hsa-mir-454	0.179169	0.541011	0.00346203	0.0220859
hsa-miR-193a-5p	-1.05022	1.08911	0.00346655	0.0220859
hsa-miR-449a	-1.37042	1.82437	0.0034827	0.022121
hsa-mir-4802	-0.010428	0.965985	0.00353196	0.0223655
hsa-mir-5197	-1.03174	1.84463	0.00356488	0.02247
hsa-miR-532-3p	-0.618248	0.861356	0.0035701	0.02247
hsa-miR-6512-5p	0.333537	0.899644	0.00358761	0.022512
hsa-mir-550a-1	-0.41993	0.995741	0.00361124	0.0225241
hsa-mir-550b-1	-0.41993	0.995741	0.00361124	0.0225241
hsa-miR-2110	-0.426658	0.97169	0.00362579	0.0225472
hsa-mir-4487	-0.85223	1.37053	0.0036572	0.0226747
hsa-miR-4802-5p	-0.00505063	0.965815	0.00367157	0.022696
hsa-mir-6727	-0.589006	1.08225	0.00368677	0.0227223
hsa-mir-5699	0.373149	1.0225	0.00374125	0.0229899
hsa-miR-150-3p	-0.519655	1.12448	0.00379749	0.0232666
hsa-mir-3143	0.103356	0.929179	0.00387287	0.0236587
hsa-miR-3128	0.33478	1.01056	0.00389375	0.0237165
hsa-miR-3157-5p	-0.0769922	0.992187	0.00391805	0.0237947
hsa-miR-3143	-0.000651847	0.957828	0.00395488	0.0239483
hsa-miR-589-3p	0.0138273	0.771511	0.003986	0.0240279
hsa-mir-1250	-0.0416413	0.923037	0.00399116	0.0240279
hsa-mir-326	-0.728741	1.07064	0.0040035	0.0240326
hsa-mir-579	-0.321514	0.944832	0.00405287	0.0242588
hsa-mir-4676	-0.395199	1.02488	0.00408101	0.0242935
hsa-mir-1976	-0.704288	1.03334	0.00408206	0.0242935
hsa-miR-99b-3p	-0.512656	0.763652	0.00410259	0.024346
hsa-mir-3180-3	-0.19891	1.01601	0.00414812	0.0244765
hsa-mir-6512	0.370852	0.905148	0.00414816	0.0244765
hsa-mir-139	-0.602806	1.12744	0.00418497	0.0246238
hsa-mir-570	0.493609	0.965818	0.00423598	0.0248535
hsa-mir-3690-1	-0.165828	1.01927	0.00425439	0.0248912
hsa-miR-580-3p	-0.129733	0.788895	0.00429011	0.0250297
hsa-miR-570-3p	0.527958	0.984061	0.00451409	0.0262627
hsa-miR-30a-5p	-1.42668	0.96297	0.00455245	0.0264118
hsa-miR-1307-3p	-1.36662	0.970372	0.00473049	0.0272517
hsa-miR-6806-3p	-7.27106	5.46362	0.00474055	0.0272517
hsa-miR-148b-5p	-0.445276	0.688659	0.00474547	0.0272517
hsa-miR-210-5p	-0.233532	1.03426	0.00475264	0.0272517
hsa-miR-29b-1-5p	0.25428	0.964083	0.00478369	0.0272517
hsa-mir-1295a	-0.21644	0.988333	0.00478905	0.0272517
hsa-mir-1295b	-0.21644	0.988333	0.00478905	0.0272517
hsa-mir-501	-0.500084	0.66419	0.00483683	0.0274306
hsa-miR-1270	-0.158149	1.00523	0.00484691	0.0274306
hsa-miR-548j-5p	-0.733573	0.879367	0.00486155	0.0274387
hsa-miR-4485-5p	-0.784381	1.03917	0.00497728	0.0279477
hsa-mir-7976	-0.108582	0.882919	0.00497865	0.0279477
hsa-mir-193a	-0.986469	1.05307	0.00499256	0.0279503
hsa-mir-10393	-0.214175	1.01405	0.00504232	0.028153
hsa-miR-5699-3p	0.0316149	0.986594	0.00507465	0.0282575
hsa-miR-2277-5p	1.56792	1.74405	0.00518054	0.02877
hsa-miR-664a-3p	-1.34502	0.873832	0.00531278	0.0294257
hsa-mir-1237	-0.178844	0.983153	0.00545802	0.0299255
hsa-miR-1237-3p	-0.178844	0.983153	0.00545802	0.0299255
hsa-mir-4760	-0.374264	1.09335	0.00546387	0.0299255
hsa-mir-3124	-0.166152	1.02212	0.00547506	0.0299255
hsa-miR-3124-5p	-0.166152	1.02212	0.00547506	0.0299255
hsa-mir-556	0.253322	0.898016	0.00555371	0.0302674
hsa-miR-660-3p	0.0839874	0.955458	0.00556868	0.0302674
hsa-mir-3180-2	-0.189725	0.959856	0.00558132	0.0302674
hsa-mir-6821	-0.0905463	1.00028	0.00569543	0.0308057
hsa-miR-188-5p	0.505594	0.954486	0.00575287	0.0308588
hsa-mir-188	0.248206	0.792901	0.00575513	0.0308588
hsa-mir-1293	0.277797	0.852617	0.00576198	0.0308588
hsa-mir-9-3	-1.19809	0.943055	0.00576466	0.0308588
hsa-mir-550a-3	-0.291099	0.972719	0.00582425	0.0309483
hsa-mir-548a-1	0.085299	0.731124	0.00588174	0.0309483
hsa-miR-7976	-0.119296	0.895278	0.00588656	0.0309483
hsa-mir-6720	-0.648918	1.32144	0.00589422	0.0309483
hsa-mir-3155a	-0.31894	1.04833	0.005916	0.0309483
hsa-mir-3155b	-0.31894	1.04833	0.005916	0.0309483
hsa-mir-219a-2	-0.655613	0.884846	0.00592322	0.0309483
hsa-mir-219b	-0.655613	0.884846	0.00592322	0.0309483
hsa-mir-548n	0.283007	0.936822	0.00593039	0.0309483
hsa-miR-548n	0.283007	0.936822	0.00593039	0.0309483
hsa-miR-1294	-0.109605	0.985697	0.00597161	0.0310853
hsa-mir-1284	-0.0175141	0.898846	0.00600316	0.0311516
hsa-miR-2277-3p	-0.0642039	0.916381	0.00602878	0.0311516
hsa-mir-589	-0.672583	0.681654	0.00602934	0.0311516
hsa-mir-9903	0.300835	1.01927	0.00612566	0.0315707
hsa-miR-181a-5p	-1.36067	0.786512	0.00619465	0.0318472
hsa-miR-222-5p	0.200976	0.998595	0.00621594	0.0318778
hsa-miR-99b-5p	-1.47528	1.01369	0.00627388	0.0320957
hsa-miR-3909	0.0168148	0.777832	0.00632984	0.0323024
hsa-miR-328-3p	-1.2668	1.37134	0.00640821	0.0326222
hsa-mir-328	-1.26362	1.36919	0.00646101	0.0327572
hsa-mir-181a-1	-1.35084	0.733657	0.00646627	0.0327572
hsa-miR-627-3p	-0.324206	0.913104	0.00650882	0.0328925
hsa-mir-379	0.304816	1.01772	0.0065865	0.0330837
hsa-miR-379-5p	0.304816	1.01772	0.0065865	0.0330837
hsa-miR-6513-3p	-0.046699	0.967046	0.00661024	0.0330837
hsa-mir-3942	0.14057	0.977039	0.00661037	0.0330837
hsa-miR-2115-3p	-0.377544	0.763457	0.00666294	0.0332667
hsa-miR-1255a	0.034165	0.928474	0.00674845	0.0336128
hsa-miR-1250-5p	-0.0374349	0.934839	0.00678848	0.0337313
hsa-miR-335-3p	-0.135954	0.957846	0.00695346	0.0344686
hsa-miR-196a-5p	-0.974759	1.45889	0.00701695	0.0347005
hsa-mir-99b	-1.4405	0.986409	0.00711945	0.0351238
hsa-miR-100-5p	-1.39463	1.13962	0.00714964	0.0351283
hsa-mir-100	-1.39366	1.13941	0.00715844	0.0351283
hsa-miR-550a-3-5p	-0.162648	0.993084	0.00717111	0.0351283
hsa-mir-4639	-0.145536	0.977933	0.00721927	0.0351982
hsa-miR-4639-5p	-0.145536	0.977933	0.00721927	0.0351982
hsa-miR-6895-5p	-0.529138	1.16998	0.00730692	0.0355421
hsa-miR-103a-2-5p	-0.258081	0.817021	0.00733159	0.0355788
hsa-mir-181b-1	-0.949737	0.801884	0.0074123	0.0358866
hsa-miR-382-5p	-0.0347256	0.985838	0.00744653	0.0359685
hsa-miR-192-3p	-0.0430513	0.857273	0.00750943	0.0360326
hsa-miR-502-5p	0.0614307	0.969459	0.00751124	0.0360326
hsa-mir-1843	-0.514755	0.896536	0.00751185	0.0360326
hsa-mir-548aw	0.6289	1.15484	0.0075729	0.0362417
hsa-miR-136-3p	0.546811	0.974077	0.00764693	0.0365119
hsa-mir-548k	-0.306659	0.820015	0.00768595	0.0365522
hsa-miR-6821-5p	-0.0859996	1.00325	0.00769056	0.0365522
hsa-miR-181a-3p	-1.20108	0.781223	0.00773157	0.0366632
hsa-miR-27a-3p	0.843159	0.353604	0.00779925	0.0368999
hsa-mir-1179	-0.133328	1.0104	0.00782836	0.0369014
hsa-miR-411-5p	0.0363599	0.993764	0.0078351	0.0369014
hsa-miR-19b-1-5p	0.548451	1.08089	0.0080069	0.037546
hsa-miR-362-5p	-0.393013	0.628915	0.00802583	0.037546
hsa-miR-339-3p	-0.0607463	0.731343	0.0080262	0.037546
hsa-mir-1262	0.154532	0.748106	0.00812163	0.037822
hsa-miR-1262	0.154532	0.748106	0.00812163	0.037822
hsa-miR-181b-3p	0.237937	0.898222	0.00824622	0.0382631
hsa-mir-6501	0.10534	0.978256	0.00825318	0.0382631
hsa-mir-3180-1	-0.195588	0.96466	0.00847362	0.0391976
hsa-miR-5695	-0.565057	1.19949	0.00851469	0.0392824
hsa-miR-556-3p	0.23377	0.937604	0.00852978	0.0392824
hsa-miR-499a-5p	0.257255	0.776508	0.00861326	0.0394152
hsa-miR-499b-3p	0.257255	0.776508	0.00861326	0.0394152
hsa-mir-3651	-0.467894	1.10286	0.00861556	0.0394152
hsa-mir-215	-0.00864149	0.898025	0.0086761	0.039605
hsa-miR-9903	0.216291	1.00972	0.00872599	0.0397453
hsa-miR-215-5p	-0.00692678	0.898774	0.00882512	0.0401089
hsa-miR-135b-3p	0.560793	0.936311	0.00885318	0.0401486
hsa-miR-3942-5p	0.0513195	0.979478	0.00893294	0.040422
hsa-mir-206	-0.585088	1.23473	0.00897859	0.0404227
hsa-miR-206	-0.585088	1.23473	0.00897859	0.0404227
hsa-mir-3912	0.2347	0.940317	0.00899148	0.0404227
hsa-mir-5696	0.469684	1.09132	0.00903573	0.0405339
hsa-mir-1827	0.00848223	0.994405	0.00907167	0.0406074
hsa-mir-181d	-0.43763	0.686822	0.00916578	0.0409405
hsa-mir-6502	0.204004	0.941463	0.0092803	0.0412745
hsa-miR-6502-5p	0.204004	0.941463	0.0092803	0.0412745
hsa-mir-136	0.663692	1.02107	0.0093149	0.0413398
hsa-miR-1291	-1.19898	1.03889	0.0094881	0.0420187
hsa-mir-181b-2	-0.788391	0.793553	0.00958359	0.0423513
hsa-miR-1282	-0.695374	1.39685	0.00975039	0.0429969
hsa-miR-4766-3p	0.0789619	0.978914	0.00985946	0.0431248
hsa-miR-10399-5p	-0.0801992	0.947876	0.00987663	0.0431248
hsa-mir-1291	-1.18717	1.03633	0.00990659	0.0431248
hsa-miR-181d-5p	-0.386023	0.683106	0.00991758	0.0431248
hsa-mir-664a	-1.0879	0.58732	0.00993596	0.0431248
hsa-mir-3688-1	0.161798	0.950849	0.00998554	0.0431248
hsa-miR-3688-3p	0.161798	0.950849	0.00998554	0.0431248
hsa-miR-3688-5p	0.161798	0.950849	0.00998554	0.0431248
hsa-mir-3688-2	0.161798	0.950849	0.00998554	0.0431248
hsa-miR-23b-5p	-0.135105	0.664569	0.009987	0.0431248
hsa-mir-548aa-1	-0.641092	1.31996	0.0101258	0.043543
hsa-mir-548d-1	-0.641092	1.31996	0.0101258	0.043543
hsa-mir-4520-1	-0.00538621	0.981399	0.0104183	0.0445242
hsa-miR-4520-5p	-0.00538621	0.981399	0.0104183	0.0445242
hsa-mir-4520-2	-0.00538621	0.981399	0.0104183	0.0445242
hsa-mir-4776-2	0.288201	0.863907	0.0105474	0.0447081
hsa-miR-4776-5p	0.288201	0.863907	0.0105474	0.0447081
hsa-miR-4776-3p	0.288201	0.863907	0.0105474	0.0447081
hsa-mir-4776-1	0.288201	0.863907	0.0105474	0.0447081
hsa-mir-1256	0.0592812	0.942978	0.0105956	0.0448208
hsa-mir-329-1	0.144915	0.998854	0.010673	0.0450565
hsa-miR-33b-3p	0.146979	0.961721	0.0106974	0.0450679
hsa-miR-125a-3p	-0.0255798	0.904568	0.0107248	0.0450918
hsa-miR-193a-3p	0.210431	0.993764	0.0107548	0.0451268
hsa-miR-3912-3p	0.261315	0.969595	0.0108539	0.0453914
hsa-mir-449c	-0.208864	1.0236	0.0108906	0.0453914
hsa-miR-449c-5p	-0.208864	1.0236	0.0108906	0.0453914
hsa-miR-200b-5p	-1.07118	0.809309	0.0109053	0.0453914
hsa-mir-4664	0.541825	1.1402	0.0109493	0.0454259
hsa-mir-330	-0.282883	0.643006	0.0109573	0.0454259
hsa-miR-424-3p	-0.870691	0.978955	0.0111495	0.0461042
hsa-miR-501-5p	0.078302	0.969693	0.0111784	0.0461042
hsa-miR-6516-5p	-0.373136	1.02485	0.0111875	0.0461042
hsa-mir-621	-0.655362	1.33498	0.0113197	0.0465564
hsa-miR-6821-3p	-0.0663738	0.99996	0.011391	0.0467571
hsa-miR-500a-5p	0.219386	0.730975	0.0114206	0.0467862
hsa-mir-137	0.0315649	0.969698	0.0115266	0.0470419
hsa-mir-551a	-0.438449	0.899354	0.011551	0.0470419
hsa-miR-551a	-0.438449	0.899354	0.011551	0.0470419
hsa-mir-3909	0.161509	0.76588	0.011635	0.047204
hsa-mir-937	-0.0282565	1.00022	0.0116362	0.047204
hsa-mir-6852	-0.14944	1.00872	0.0118517	0.0479842
hsa-miR-324-3p	-0.39987	0.985339	0.0119894	0.0484473
hsa-miR-330-3p	0.0299662	0.719912	0.0120877	0.0487496
hsa-miR-331-5p	0.117852	0.839316	0.0121276	0.048772
hsa-miR-340-3p	-0.533451	0.914981	0.0121956	0.048772
hsa-mir-889	-0.0569085	0.887716	0.0122288	0.048772
hsa-miR-27a-5p	-1.28182	1.29807	0.0122311	0.048772
hsa-mir-549a	0.585413	0.897374	0.0122443	0.048772
hsa-mir-488	-0.531669	1.21389	0.0122607	0.048772
hsa-miR-488-3p	-0.531669	1.21389	0.0122607	0.048772
hsa-mir-3665	-0.29012	1.05172	0.012328	0.048772
hsa-miR-3613-5p	-0.985024	0.796359	0.0123414	0.048772
hsa-mir-3616	0.177372	0.98661	0.012346	0.048772
hsa-mir-4485	-1.04119	0.945143	0.0123515	0.048772
hsa-miR-10393-3p	-0.152876	1.01531	0.0124831	0.0491982

## Sheet: Supplementary Table 4
Supplementary Table 4. miRNA enrichment in disease and cancer-specific pathways in HCC+/-CLD
Categories	Functions	Diseases or Functions Annotation	p-value	B-H p-value	Predicted Activation State	Activation z-score	Flags	Bias-corrected z-score	Molecules	# Molecules
Organismal Injury and Abnormalities,Reproductive System Disease	nonobstructive azoospermia	Nonobstructive azoospermia	8.06e-34	6.1e-31					miR-1-3p (and other miRNAs w/seed GGAAUGU),miR-130a-3p (and other miRNAs w/seed AGUGCAA),miR-130b-5p (and other miRNAs w/seed CUCUUUC),miR-132-3p (and other miRNAs w/seed AACAGUC),miR-17-5p (and other miRNAs w/seed AAAGUGC),miR-181a-1-3p (and other miRNAs w/seed CCAUCGA),miR-181a-5p (and other miRNAs w/seed ACAUUCA),miR-18a-3p (and other miRNAs w/seed CUGCCCU),miR-190a-5p (and other miRNAs w/seed…	32
Neurological Disease,Organismal Injury and Abnormalities,Psychological Disorders	sporadic amyotrophic lateral sclerosis	Sporadic amyotrophic lateral sclerosis	1.87e-20	7.06e-18					miR-1-3p (and other miRNAs w/seed GGAAUGU),miR-100-5p (and other miRNAs w/seed ACCCGUA),miR-106b-3p (miRNAs w/seed CGCACUG),miR-1246 (miRNAs w/seed AUGGAUU),miR-1249-3p (and other miRNAs w/seed CGCCCUU),miR-130a-3p (and other miRNAs w/seed AGUGCAA),miR-132-3p (and other miRNAs w/seed AACAGUC),miR-146a-3p (and other miRNAs w/seed CUCUGAA),miR-151-5p (and other miRNAs w/seed CGAGGAG),miR-17-5p (and…	20
Psychological Disorders	sporadic psychological disorder	Sporadic psychological disorder	6.62e-20	1.67e-17					miR-1-3p (and other miRNAs w/seed GGAAUGU),miR-100-5p (and other miRNAs w/seed ACCCGUA),miR-106b-3p (miRNAs w/seed CGCACUG),miR-1246 (miRNAs w/seed AUGGAUU),miR-1249-3p (and other miRNAs w/seed CGCCCUU),miR-130a-3p (and other miRNAs w/seed AGUGCAA),miR-132-3p (and other miRNAs w/seed AACAGUC),miR-146a-3p (and other miRNAs w/seed CUCUGAA),miR-151-5p (and other miRNAs w/seed CGAGGAG),miR-17-5p (and…	21
Cancer,Organismal Injury and Abnormalities,Reproductive System Disease	invasive cervical squamous cell carcinoma	Early stage invasive cervical squamous cell carcinoma	1.28e-18	2.42e-16					miR-10a-5p (and other miRNAs w/seed ACCCUGU),miR-130a-3p (and other miRNAs w/seed AGUGCAA),miR-132-3p (and other miRNAs w/seed AACAGUC),miR-133a-3p (and other miRNAs w/seed UUGGUCC),miR-17-5p (and other miRNAs w/seed AAAGUGC),miR-181a-5p (and other miRNAs w/seed ACAUUCA),miR-192-5p (and other miRNAs w/seed UGACCUA),miR-214-3p (and other miRNAs w/seed CAGCAGG),miR-26a-5p (and other miRNAs w/seed U…	15
Neurological Disease	sporadic neurological disorder	Sporadic neurological disorder	7.23e-18	1.09e-15					miR-1-3p (and other miRNAs w/seed GGAAUGU),miR-100-5p (and other miRNAs w/seed ACCCGUA),miR-106b-3p (miRNAs w/seed CGCACUG),miR-1246 (miRNAs w/seed AUGGAUU),miR-1249-3p (and other miRNAs w/seed CGCCCUU),miR-130a-3p (and other miRNAs w/seed AGUGCAA),miR-132-3p (and other miRNAs w/seed AACAGUC),miR-146a-3p (and other miRNAs w/seed CUCUGAA),miR-151-5p (and other miRNAs w/seed CGAGGAG),miR-17-5p (and…	21
Neurological Disease,Organismal Injury and Abnormalities,Psychological Disorders	chronic epilepsy	Chronic epilepsy	8.83e-17	1.11e-14					miR-100-5p (and other miRNAs w/seed ACCCGUA),miR-125a-3p (miRNAs w/seed CAGGUGA),miR-125b-5p (and other miRNAs w/seed CCCUGAG),miR-127-3p (miRNAs w/seed CGGAUCC),miR-132-3p (and other miRNAs w/seed AACAGUC),miR-151-5p (and other miRNAs w/seed CGAGGAG),miR-181a-1-3p (and other miRNAs w/seed CCAUCGA),miR-181a-5p (and other miRNAs w/seed ACAUUCA),miR-1839-5p (and other miRNAs w/seed AGGUAGA),miR-184…	14
Inflammatory Disease,Inflammatory Response,Organismal Injury and Abnormalities,Renal and Urological Disease	lupus nephritis	Class II lupus nephritis	2.65e-16	2.87e-14					miR-100-5p (and other miRNAs w/seed ACCCGUA),miR-130a-3p (and other miRNAs w/seed AGUGCAA),miR-133a-3p (and other miRNAs w/seed UUGGUCC),miR-184 (and other miRNAs w/seed GGACGGA),miR-296-5p (miRNAs w/seed GGGCCCC),miR-30c-5p (and other miRNAs w/seed GUAAACA),miR-3118 (and other miRNAs w/seed GUGACUG),miR-320b (and other miRNAs w/seed AAAGCUG),miR-324-3p (miRNAs w/seed CCACUGC),miR-325-5p (and oth…	15
Neurological Disease,Organismal Injury and Abnormalities	pilocarpine-induced status epilepticus	Chronic phase pilocarpine-induced status epilepticus	7.51e-16	7.11e-14					miR-100-5p (and other miRNAs w/seed ACCCGUA),miR-125a-3p (miRNAs w/seed CAGGUGA),miR-125b-5p (and other miRNAs w/seed CCCUGAG),miR-132-3p (and other miRNAs w/seed AACAGUC),miR-181a-1-3p (and other miRNAs w/seed CCAUCGA),miR-181a-5p (and other miRNAs w/seed ACAUUCA),miR-1839-5p (and other miRNAs w/seed AGGUAGA),miR-296-5p (miRNAs w/seed GGGCCCC),miR-30c-5p (and other miRNAs w/seed GUAAACA),miR-320…	12
Neurological Disease,Organismal Injury and Abnormalities	kainic acid-induced epileptic seizure	Kainic acid-induced epileptic seizure	9.34e-16	7.86e-14					miR-100-5p (and other miRNAs w/seed ACCCGUA),miR-10a-5p (and other miRNAs w/seed ACCCUGU),miR-125b-5p (and other miRNAs w/seed CCCUGAG),miR-132-3p (and other miRNAs w/seed AACAGUC),miR-151-5p (and other miRNAs w/seed CGAGGAG),miR-1839-5p (and other miRNAs w/seed AGGUAGA),miR-296-5p (miRNAs w/seed GGGCCCC),miR-30c-5p (and other miRNAs w/seed GUAAACA),miR-320b (and other miRNAs w/seed AAAGCUG),miR-…	12
Cancer,Gastrointestinal Disease,Organismal Injury and Abnormalities,Respiratory Disease	squamous cell cancer of the hypopharynx	Hypopharyngeal squamous cell carcinoma	2.68e-15	2.03e-13					miR-1-3p (and other miRNAs w/seed GGAAUGU),miR-100-5p (and other miRNAs w/seed ACCCGUA),miR-10a-5p (and other miRNAs w/seed ACCCUGU),miR-125b-5p (and other miRNAs w/seed CCCUGAG),miR-130a-3p (and other miRNAs w/seed AGUGCAA),miR-139-5p (miRNAs w/seed CUACAGU),miR-140-5p (and other miRNAs w/seed AGUGGUU),miR-196a-5p (and other miRNAs w/seed AGGUAGU),miR-214-3p (and other miRNAs w/seed CAGCAGG),miR…	14
Neurological Disease,Organismal Injury and Abnormalities,Psychological Disorders	amyotrophic lateral sclerosis	Amyotrophic lateral sclerosis	6.96e-15	4.79e-13					miR-1-3p (and other miRNAs w/seed GGAAUGU),miR-100-5p (and other miRNAs w/seed ACCCGUA),miR-106b-3p (miRNAs w/seed CGCACUG),miR-1246 (miRNAs w/seed AUGGAUU),miR-1249-3p (and other miRNAs w/seed CGCCCUU),miR-1290 (miRNAs w/seed GGAUUUU),miR-130a-3p (and other miRNAs w/seed AGUGCAA),miR-132-3p (and other miRNAs w/seed AACAGUC),miR-146a-3p (and other miRNAs w/seed CUCUGAA),miR-151-5p (and other miRN…	24
Neurological Disease,Organismal Injury and Abnormalities	kainic acid-induced epileptic seizure	Chronic phase kainic acid-induced epileptic seizure	1.23e-14	7.77e-13					miR-100-5p (and other miRNAs w/seed ACCCGUA),miR-125b-5p (and other miRNAs w/seed CCCUGAG),miR-132-3p (and other miRNAs w/seed AACAGUC),miR-151-5p (and other miRNAs w/seed CGAGGAG),miR-1839-5p (and other miRNAs w/seed AGGUAGA),miR-296-5p (miRNAs w/seed GGGCCCC),miR-30c-5p (and other miRNAs w/seed GUAAACA),miR-320b (and other miRNAs w/seed AAAGCUG),miR-378a-3p (and other miRNAs w/seed CUGGACU),miR…	11
Skeletal and Muscular System Development and Function,Tissue Morphology	quantity	Quantity of muscle cell lines	2.26e-14	1.31e-12	Decreased	-3.464	bias		miR-125b-5p (and other miRNAs w/seed CCCUGAG),miR-130b-5p (and other miRNAs w/seed CUCUUUC),miR-133a-3p (and other miRNAs w/seed UUGGUCC),miR-296-5p (miRNAs w/seed GGGCCCC),miR-339-5p (and other miRNAs w/seed CCCUGUC),miR-342-3p (miRNAs w/seed CUCACAC),miR-361-3p (miRNAs w/seed CCCCCAG),miR-501-3p (and other miRNAs w/seed AUGCACC),miR-532-3p (miRNAs w/seed CUCCCAC),miR-625-3p (miRNAs w/seed ACUAU…	12
Neurological Disease	progressive motor neuropathy	Progressive motor neuropathy	7.22e-12	3.9e-10					miR-1-3p (and other miRNAs w/seed GGAAUGU),miR-100-5p (and other miRNAs w/seed ACCCGUA),miR-106b-3p (miRNAs w/seed CGCACUG),miR-1246 (miRNAs w/seed AUGGAUU),miR-1249-3p (and other miRNAs w/seed CGCCCUU),miR-125b-5p (and other miRNAs w/seed CCCUGAG),miR-1290 (miRNAs w/seed GGAUUUU),miR-130a-3p (and other miRNAs w/seed AGUGCAA),miR-132-3p (and other miRNAs w/seed AACAGUC),miR-146a-3p (and other miR…	28
Cancer,Connective Tissue Disorders,Organismal Injury and Abnormalities	dedifferentiated liposarcoma	Dedifferentiated liposarcoma	1.17e-11	5.92e-10					miR-127-3p (miRNAs w/seed CGGAUCC),miR-136-5p (miRNAs w/seed CUCCAUU),miR-190a-5p (and other miRNAs w/seed GAUAUGU),miR-193a-3p (and other miRNAs w/seed ACUGGCC),miR-193a-5p (miRNAs w/seed GGGUCUU),miR-26a-5p (and other miRNAs w/seed UCAAGUA),miR-34a-5p (and other miRNAs w/seed GGCAGUG),miR-376c-3p (and other miRNAs w/seed ACAUAGA),miR-378a-3p (and other miRNAs w/seed CUGGACU),miR-409-3p (miRNAs …	10
Cancer,Organismal Injury and Abnormalities	solid tumor	Early stage solid tumor	1.44e-11	6.81e-10					miR-10a-5p (and other miRNAs w/seed ACCCUGU),miR-125b-5p (and other miRNAs w/seed CCCUGAG),miR-130a-3p (and other miRNAs w/seed AGUGCAA),miR-132-3p (and other miRNAs w/seed AACAGUC),miR-133a-3p (and other miRNAs w/seed UUGGUCC),miR-17-5p (and other miRNAs w/seed AAAGUGC),miR-181a-5p (and other miRNAs w/seed ACAUUCA),miR-192-5p (and other miRNAs w/seed UGACCUA),miR-214-3p (and other miRNAs w/seed …	16
Cellular Development,Skeletal and Muscular System Development and Function	differentiation	Differentiation of muscle cell lines	5.39e-11	2.4e-09	Decreased	-3.5			miR-100-5p (and other miRNAs w/seed ACCCGUA),miR-125b-5p (and other miRNAs w/seed CCCUGAG),miR-130b-5p (and other miRNAs w/seed CUCUUUC),miR-133a-3p (and other miRNAs w/seed UUGGUCC),miR-192-5p (and other miRNAs w/seed UGACCUA),miR-296-5p (miRNAs w/seed GGGCCCC),miR-339-5p (and other miRNAs w/seed CCCUGUC),miR-342-3p (miRNAs w/seed CUCACAC),miR-361-3p (miRNAs w/seed CCCCCAG),miR-455-3p (miRNAs w/…	16
Cancer,Organismal Injury and Abnormalities	primary melanoma	Primary melanoma	3.44e-10	1.45e-08					miR-100-5p (and other miRNAs w/seed ACCCGUA),miR-10a-5p (and other miRNAs w/seed ACCCUGU),miR-125b-5p (and other miRNAs w/seed CCCUGAG),miR-130a-3p (and other miRNAs w/seed AGUGCAA),miR-132-3p (and other miRNAs w/seed AACAGUC),miR-196a-5p (and other miRNAs w/seed AGGUAGU),miR-27a-3p (and other miRNAs w/seed UCACAGU),miR-9-5p (and other miRNAs w/seed CUUUGGU),miR-92a-3p (and other miRNAs w/seed AU…	9
Developmental Disorder,Hereditary Disorder,Organismal Injury and Abnormalities,Skeletal and Muscular Disorders	LMNA-related congenital muscular dystrophy	LMNA-related congenital muscular dystrophy	5.49e-10	2.19e-08					miR-100-5p (and other miRNAs w/seed ACCCGUA),miR-127-3p (miRNAs w/seed CGGAUCC),miR-136-3p (miRNAs w/seed AUCAUCG),miR-376c-3p (and other miRNAs w/seed ACAUAGA),miR-501-3p (and other miRNAs w/seed AUGCACC),miR-505-5p (and other miRNAs w/seed GGAGCCA),miR-532-3p (miRNAs w/seed CUCCCAC)	7
Neurological Disease,Organismal Injury and Abnormalities	progressive encephalopathy	Progressive encephalopathy	9.21e-10	3.48e-08					miR-1-3p (and other miRNAs w/seed GGAAUGU),miR-100-5p (and other miRNAs w/seed ACCCGUA),miR-106b-3p (miRNAs w/seed CGCACUG),miR-1246 (miRNAs w/seed AUGGAUU),miR-1249-3p (and other miRNAs w/seed CGCCCUU),miR-125b-5p (and other miRNAs w/seed CCCUGAG),miR-1290 (miRNAs w/seed GGAUUUU),miR-130a-3p (and other miRNAs w/seed AGUGCAA),miR-132-3p (and other miRNAs w/seed AACAGUC),miR-146a-3p (and other miR…	31
Cancer,Hematological Disease,Immunological Disease,Organismal Injury and Abnormalities	nasal type extranodal NK-/T-cell lymphoma	Nasal type extranodal NK-/T-cell lymphoma	1.7e-09	6.12e-08					miR-10a-5p (and other miRNAs w/seed ACCCUGU),miR-132-3p (and other miRNAs w/seed AACAGUC),miR-140-5p (and other miRNAs w/seed AGUGGUU),miR-181a-5p (and other miRNAs w/seed ACAUUCA),miR-192-5p (and other miRNAs w/seed UGACCUA),miR-26a-5p (and other miRNAs w/seed UCAAGUA),miR-30c-5p (and other miRNAs w/seed GUAAACA),miR-342-3p (miRNAs w/seed CUCACAC),miR-361-3p (miRNAs w/seed CCCCCAG),miR-378a-3p (…	11
Neurological Disease	neurological disorder	Progressive neurological disorder	2.3e-09	7.92e-08					miR-1-3p (and other miRNAs w/seed GGAAUGU),miR-100-5p (and other miRNAs w/seed ACCCGUA),miR-106b-3p (miRNAs w/seed CGCACUG),miR-1246 (miRNAs w/seed AUGGAUU),miR-1249-3p (and other miRNAs w/seed CGCCCUU),miR-125b-5p (and other miRNAs w/seed CCCUGAG),miR-1290 (miRNAs w/seed GGAUUUU),miR-130a-3p (and other miRNAs w/seed AGUGCAA),miR-132-3p (and other miRNAs w/seed AACAGUC),miR-146a-3p (and other miR…	33
Inflammatory Disease,Inflammatory Response,Organismal Injury and Abnormalities,Respiratory Disease	severe asthma	Severe asthma	2.62e-09	8.64e-08					miR-100-5p (and other miRNAs w/seed ACCCGUA),miR-17-5p (and other miRNAs w/seed AAAGUGC),miR-192-5p (and other miRNAs w/seed UGACCUA),miR-27a-3p (and other miRNAs w/seed UCACAGU),miR-320b (and other miRNAs w/seed AAAGCUG),miR-342-3p (miRNAs w/seed CUCACAC),miR-625-3p (miRNAs w/seed ACUAUAG),miR-96-5p (and other miRNAs w/seed UUGGCAC)	8
Inflammatory Response	inflammation	Inflammation of absolute anatomical region	1.65e-08	5.19e-07					miR-100-5p (and other miRNAs w/seed ACCCGUA),miR-130a-3p (and other miRNAs w/seed AGUGCAA),miR-133a-3p (and other miRNAs w/seed UUGGUCC),miR-138-5p (miRNAs w/seed GCUGGUG),miR-140-5p (and other miRNAs w/seed AGUGGUU),miR-146b-3p (miRNAs w/seed CCCUGUG),miR-150-3p (miRNAs w/seed UGGUACA),miR-17-5p (and other miRNAs w/seed AAAGUGC),miR-181a-1-3p (and other miRNAs w/seed CCAUCGA),miR-181a-5p (and ot…	34
Cancer,Hematological Disease,Hereditary Disorder,Organismal Injury and Abnormalities	myelodysplastic syndrome with isolated del(5q)	Myelodysplastic syndrome with isolated del(5q)	6.68e-08	2.02e-06					miR-100-5p (and other miRNAs w/seed ACCCGUA),miR-10a-5p (and other miRNAs w/seed ACCCUGU),miR-125b-5p (and other miRNAs w/seed CCCUGAG),miR-130a-3p (and other miRNAs w/seed AGUGCAA),miR-34a-5p (and other miRNAs w/seed GGCAGUG),miR-378a-3p (and other miRNAs w/seed CUGGACU)	6
Cancer,Organismal Injury and Abnormalities	carcinoma	Invasive carcinoma	7.04e-08	2.05e-06					miR-10a-5p (and other miRNAs w/seed ACCCUGU),miR-130a-3p (and other miRNAs w/seed AGUGCAA),miR-132-3p (and other miRNAs w/seed AACAGUC),miR-133a-3p (and other miRNAs w/seed UUGGUCC),miR-17-5p (and other miRNAs w/seed AAAGUGC),miR-181a-5p (and other miRNAs w/seed ACAUUCA),miR-192-5p (and other miRNAs w/seed UGACCUA),miR-214-3p (and other miRNAs w/seed CAGCAGG),miR-26a-5p (and other miRNAs w/seed U…	16
Cancer,Organismal Injury and Abnormalities	metastatic melanoma cancer	Metastatic melanoma	7.98e-08	2.24e-06					miR-1-3p (and other miRNAs w/seed GGAAUGU),miR-125b-5p (and other miRNAs w/seed CCCUGAG),miR-130a-3p (and other miRNAs w/seed AGUGCAA),miR-133a-3p (and other miRNAs w/seed UUGGUCC),miR-138-5p (miRNAs w/seed GCUGGUG),miR-196a-5p (and other miRNAs w/seed AGGUAGU),miR-27a-3p (and other miRNAs w/seed UCACAGU),miR-34a-5p (and other miRNAs w/seed GGCAGUG),miR-92a-3p (and other miRNAs w/seed AUUGCAC),mi…	10
Endocrine System Disorders,Gastrointestinal Disease,Metabolic Disease,Organismal Injury and Abnormalities	non-insulin-dependent diabetes mellitus	Non-insulin-dependent diabetes mellitus	1.88e-07	5.1e-06					miR-1-3p (and other miRNAs w/seed GGAAUGU),miR-100-5p (and other miRNAs w/seed ACCCGUA),miR-125b-5p (and other miRNAs w/seed CCCUGAG),miR-127-3p (miRNAs w/seed CGGAUCC),miR-130a-3p (and other miRNAs w/seed AGUGCAA),miR-132-3p (and other miRNAs w/seed AACAGUC),miR-133a-3p (and other miRNAs w/seed UUGGUCC),miR-17-5p (and other miRNAs w/seed AAAGUGC),miR-184 (and other miRNAs w/seed GGACGGA),miR-190…	17
Neurological Disease,Organismal Injury and Abnormalities	epilepsy	Epilepsy	2.2e-07	5.73e-06					miR-100-5p (and other miRNAs w/seed ACCCGUA),miR-10a-5p (and other miRNAs w/seed ACCCUGU),miR-125a-3p (miRNAs w/seed CAGGUGA),miR-125b-5p (and other miRNAs w/seed CCCUGAG),miR-127-3p (miRNAs w/seed CGGAUCC),miR-132-3p (and other miRNAs w/seed AACAGUC),miR-151-5p (and other miRNAs w/seed CGAGGAG),miR-181a-1-3p (and other miRNAs w/seed CCAUCGA),miR-181a-5p (and other miRNAs w/seed ACAUUCA),miR-1839…	17
Cancer,Organismal Injury and Abnormalities,Reproductive System Disease	cervical squamous cell carcinoma	Cervical squamous cell carcinoma	3.29e-07	8.3e-06					miR-10a-5p (and other miRNAs w/seed ACCCUGU),miR-130a-3p (and other miRNAs w/seed AGUGCAA),miR-132-3p (and other miRNAs w/seed AACAGUC),miR-133a-3p (and other miRNAs w/seed UUGGUCC),miR-17-5p (and other miRNAs w/seed AAAGUGC),miR-181a-5p (and other miRNAs w/seed ACAUUCA),miR-192-5p (and other miRNAs w/seed UGACCUA),miR-214-3p (and other miRNAs w/seed CAGCAGG),miR-26a-5p (and other miRNAs w/seed U…	17
Immunological Disease,Inflammatory Disease,Inflammatory Response,Neurological Disease,Organismal Injury and Abnormalities	experimental autoimmune encephalomyelitis	Experimental autoimmune encephalomyelitis	3.56e-07	8.68e-06					miR-133a-3p (and other miRNAs w/seed UUGGUCC),miR-140-5p (and other miRNAs w/seed AGUGGUU),miR-17-5p (and other miRNAs w/seed AAAGUGC),miR-181a-1-3p (and other miRNAs w/seed CCAUCGA),miR-181a-5p (and other miRNAs w/seed ACAUUCA),miR-193a-3p (and other miRNAs w/seed ACUGGCC),miR-30c-5p (and other miRNAs w/seed GUAAACA),miR-3118 (and other miRNAs w/seed GUGACUG),miR-320b (and other miRNAs w/seed AA…	15
Inflammatory Response,Organismal Injury and Abnormalities	inflammation	Inflammation of organ	3.67e-07	8.68e-06					miR-100-5p (and other miRNAs w/seed ACCCGUA),miR-130a-3p (and other miRNAs w/seed AGUGCAA),miR-133a-3p (and other miRNAs w/seed UUGGUCC),miR-138-5p (miRNAs w/seed GCUGGUG),miR-140-5p (and other miRNAs w/seed AGUGGUU),miR-146b-3p (miRNAs w/seed CCCUGUG),miR-150-3p (miRNAs w/seed UGGUACA),miR-17-5p (and other miRNAs w/seed AAAGUGC),miR-181a-1-3p (and other miRNAs w/seed CCAUCGA),miR-181a-5p (and ot…	34
Infectious Diseases,Organismal Development	growth	Growth of Murine cytomegalovirus	2.39e-06	5.49e-05		-1.044			miR-17-5p (and other miRNAs w/seed AAAGUGC),miR-214-3p (and other miRNAs w/seed CAGCAGG),miR-30c-5p (and other miRNAs w/seed GUAAACA),miR-378a-3p (and other miRNAs w/seed CUGGACU)	4
Cancer,Organismal Injury and Abnormalities	EPCAM positive tumor	EPCAM positive tumor	3.72e-06	8.29e-05					miR-17-5p (and other miRNAs w/seed AAAGUGC),miR-181a-5p (and other miRNAs w/seed ACAUUCA),miR-92a-3p (and other miRNAs w/seed AUUGCAC)	3
Cancer,Gastrointestinal Disease,Organismal Injury and Abnormalities	colorectal cancer	Advanced Dukes' stage colorectal cancer	3.86e-06	8.35e-05					miR-125b-5p (and other miRNAs w/seed CCCUGAG),miR-330-5p (and other miRNAs w/seed CUCUGGG),miR-344a-5p (and other miRNAs w/seed CAGGCUC),miR-92a-3p (and other miRNAs w/seed AUUGCAC)	4
Organismal Injury and Abnormalities	idiopathic fibrosis	Idiopathic fibrosis	4.13e-06	8.68e-05					miR-125b-5p (and other miRNAs w/seed CCCUGAG),miR-138-5p (miRNAs w/seed GCUGGUG),miR-140-5p (and other miRNAs w/seed AGUGGUU),miR-17-5p (and other miRNAs w/seed AAAGUGC),miR-184 (and other miRNAs w/seed GGACGGA),miR-26a-5p (and other miRNAs w/seed UCAAGUA),miR-30a-3p (and other miRNAs w/seed UUUCAGU),miR-30c-5p (and other miRNAs w/seed GUAAACA),miR-376c-3p (and other miRNAs w/seed ACAUAGA),miR-37…	11
Inflammatory Response	inflammation	Inflammation of body cavity	5.85e-06	0.00012					miR-100-5p (and other miRNAs w/seed ACCCGUA),miR-130a-3p (and other miRNAs w/seed AGUGCAA),miR-133a-3p (and other miRNAs w/seed UUGGUCC),miR-138-5p (miRNAs w/seed GCUGGUG),miR-146b-3p (miRNAs w/seed CCCUGUG),miR-150-3p (miRNAs w/seed UGGUACA),miR-184 (and other miRNAs w/seed GGACGGA),miR-188-5p (and other miRNAs w/seed AUCCCUU),miR-1970 (and other miRNAs w/seed GUGUCAC),miR-27a-3p (and other miRN…	26
Connective Tissue Disorders,Inflammatory Disease,Organismal Injury and Abnormalities,Respiratory Disease	idiopathic pulmonary fibrosis	Idiopathic pulmonary fibrosis	6.41e-06	0.000128					miR-125b-5p (and other miRNAs w/seed CCCUGAG),miR-138-5p (miRNAs w/seed GCUGGUG),miR-140-5p (and other miRNAs w/seed AGUGGUU),miR-17-5p (and other miRNAs w/seed AAAGUGC),miR-184 (and other miRNAs w/seed GGACGGA),miR-26a-5p (and other miRNAs w/seed UCAAGUA),miR-30a-3p (and other miRNAs w/seed UUUCAGU),miR-30c-5p (and other miRNAs w/seed GUAAACA),miR-92a-3p (and other miRNAs w/seed AUUGCAC)	9
Developmental Disorder,Organismal Injury and Abnormalities,Skeletal and Muscular Disorders	congenital myopathy	Congenital myopathy	1.02e-05	0.000199					miR-100-5p (and other miRNAs w/seed ACCCGUA),miR-127-3p (miRNAs w/seed CGGAUCC),miR-136-3p (miRNAs w/seed AUCAUCG),miR-30a-3p (and other miRNAs w/seed UUUCAGU),miR-376c-3p (and other miRNAs w/seed ACAUAGA),miR-501-3p (and other miRNAs w/seed AUGCACC),miR-505-5p (and other miRNAs w/seed GGAGCCA),miR-532-3p (miRNAs w/seed CUCCCAC)	8
Cancer,Organismal Injury and Abnormalities	cancer	Invasive cancer	2.2e-05	0.000415					miR-10a-5p (and other miRNAs w/seed ACCCUGU),miR-130a-3p (and other miRNAs w/seed AGUGCAA),miR-132-3p (and other miRNAs w/seed AACAGUC),miR-133a-3p (and other miRNAs w/seed UUGGUCC),miR-17-5p (and other miRNAs w/seed AAAGUGC),miR-181a-5p (and other miRNAs w/seed ACAUUCA),miR-192-5p (and other miRNAs w/seed UGACCUA),miR-196a-5p (and other miRNAs w/seed AGGUAGU),miR-214-3p (and other miRNAs w/seed …	17
Digestive System Development and Function,Gastrointestinal Disease,Hepatic System Development and Function,Hepatic System Disease,Infectious Diseases,Inflammatory Disease,Inflammatory Response,Organ Development,Organismal Injury and Abnormalities	chronic hepatitis B	Chronic hepatitis B	2.33e-05	0.00043					miR-100-5p (and other miRNAs w/seed ACCCGUA),miR-130a-3p (and other miRNAs w/seed AGUGCAA),miR-1970 (and other miRNAs w/seed GUGUCAC),miR-27a-3p (and other miRNAs w/seed UCACAGU),miR-671-5p (miRNAs w/seed GGAAGCC)	5
Organismal Injury and Abnormalities	fibrosis	Fibrosis	2.49e-05	0.000448					miR-100-5p (and other miRNAs w/seed ACCCGUA),miR-125b-5p (and other miRNAs w/seed CCCUGAG),miR-130a-3p (and other miRNAs w/seed AGUGCAA),miR-133a-3p (and other miRNAs w/seed UUGGUCC),miR-138-5p (miRNAs w/seed GCUGGUG),miR-140-5p (and other miRNAs w/seed AGUGGUU),miR-17-5p (and other miRNAs w/seed AAAGUGC),miR-184 (and other miRNAs w/seed GGACGGA),miR-192-5p (and other miRNAs w/seed UGACCUA),miR-1…	20
Hereditary Disorder,Neurological Disease,Organismal Injury and Abnormalities,Psychological Disorders,Skeletal and Muscular Disorders	Huntington disease	Early symptomatic stage Huntington disease	3.01e-05	0.000524					miR-135b-3p (and other miRNAs w/seed UGUAGGG),miR-140-5p (and other miRNAs w/seed AGUGGUU),miR-3928-5p (and other miRNAs w/seed GAAGCUC)	3
Cancer,Gastrointestinal Disease,Organismal Injury and Abnormalities,Respiratory Disease	pharyngeal carcinoma	Pharyngeal carcinoma	3.04e-05	0.000524					miR-1-3p (and other miRNAs w/seed GGAAUGU),miR-100-5p (and other miRNAs w/seed ACCCGUA),miR-10a-5p (and other miRNAs w/seed ACCCUGU),miR-125b-5p (and other miRNAs w/seed CCCUGAG),miR-130a-3p (and other miRNAs w/seed AGUGCAA),miR-139-5p (miRNAs w/seed CUACAGU),miR-140-5p (and other miRNAs w/seed AGUGGUU),miR-17-5p (and other miRNAs w/seed AAAGUGC),miR-196a-5p (and other miRNAs w/seed AGGUAGU),miR-…	17
Cancer,Gastrointestinal Disease,Organismal Injury and Abnormalities	colorectal cancer	Stage I-III colorectal cancer	3.21e-05	0.00054					miR-125b-5p (and other miRNAs w/seed CCCUGAG),miR-17-5p (and other miRNAs w/seed AAAGUGC),miR-181a-5p (and other miRNAs w/seed ACAUUCA),miR-34a-5p (and other miRNAs w/seed GGCAGUG),miR-92a-3p (and other miRNAs w/seed AUUGCAC)	5
Cancer,Gastrointestinal Disease,Organismal Injury and Abnormalities	colorectal cancer	Stage II colorectal cancer	3.38e-05	0.000556					miR-17-5p (and other miRNAs w/seed AAAGUGC),miR-181a-5p (and other miRNAs w/seed ACAUUCA),miR-34a-5p (and other miRNAs w/seed GGCAGUG),miR-92a-3p (and other miRNAs w/seed AUUGCAC)	4
Developmental Disorder,Hereditary Disorder,Organismal Injury and Abnormalities,Renal and Urological Disease	polycystic kidney disease	Polycystic Kidney Disease	3.68e-05	0.000592					miR-100-5p (and other miRNAs w/seed ACCCGUA),miR-136-5p (miRNAs w/seed CUCCAUU),miR-17-5p (and other miRNAs w/seed AAAGUGC),miR-181a-5p (and other miRNAs w/seed ACAUUCA),miR-196a-5p (and other miRNAs w/seed AGGUAGU),miR-216a-5p (miRNAs w/seed AAUCUCA),miR-30c-5p (and other miRNAs w/seed GUAAACA),miR-34a-5p (and other miRNAs w/seed GGCAGUG),miR-379-5p (and other miRNAs w/seed GGUAGAC),miR-96-5p (a…	10
Cancer,Organismal Injury and Abnormalities	invasive tumor	Invasive tumor	4.16e-05	0.000648		1.599			miR-1-3p (and other miRNAs w/seed GGAAUGU),miR-10a-5p (and other miRNAs w/seed ACCCUGU),miR-122-5p (miRNAs w/seed GGAGUGU),miR-125b-5p (and other miRNAs w/seed CCCUGAG),miR-130a-3p (and other miRNAs w/seed AGUGCAA),miR-132-3p (and other miRNAs w/seed AACAGUC),miR-133a-3p (and other miRNAs w/seed UUGGUCC),miR-138-5p (miRNAs w/seed GCUGGUG),miR-17-5p (and other miRNAs w/seed AAAGUGC),miR-181a-5p (a…	27
Organismal Injury and Abnormalities,Renal and Urological Disease	cystic kidney disease	Cystic kidney disease	4.2e-05	0.000648					miR-100-5p (and other miRNAs w/seed ACCCGUA),miR-136-5p (miRNAs w/seed CUCCAUU),miR-17-5p (and other miRNAs w/seed AAAGUGC),miR-181a-5p (and other miRNAs w/seed ACAUUCA),miR-192-5p (and other miRNAs w/seed UGACCUA),miR-196a-5p (and other miRNAs w/seed AGGUAGU),miR-216a-5p (miRNAs w/seed AAUCUCA),miR-30c-5p (and other miRNAs w/seed GUAAACA),miR-34a-5p (and other miRNAs w/seed GGCAGUG),miR-379-5p (…	11
Metabolic Disease,Neurological Disease,Organismal Injury and Abnormalities,Psychological Disorders	nonfamilial Alzheimer disease	Nonfamilial Alzheimer disease	5.44e-05	0.000823					miR-17-5p (and other miRNAs w/seed AAAGUGC),miR-181a-5p (and other miRNAs w/seed ACAUUCA),miR-34a-5p (and other miRNAs w/seed GGCAGUG),miR-92a-3p (and other miRNAs w/seed AUUGCAC)	4
Infectious Diseases,Organismal Development	growth	Growth of Murine herpesvirus 4	6.55e-05	0.000971					miR-17-5p (and other miRNAs w/seed AAAGUGC),miR-214-3p (and other miRNAs w/seed CAGCAGG),miR-30c-5p (and other miRNAs w/seed GUAAACA)	3
Neurological Disease	epilepsy or neurodevelopmental disorder	Epilepsy or neurodevelopmental disorder	6.67e-05	0.000971					miR-100-5p (and other miRNAs w/seed ACCCGUA),miR-10a-5p (and other miRNAs w/seed ACCCUGU),miR-125a-3p (miRNAs w/seed CAGGUGA),miR-125b-5p (and other miRNAs w/seed CCCUGAG),miR-127-3p (miRNAs w/seed CGGAUCC),miR-130a-3p (and other miRNAs w/seed AGUGCAA),miR-132-3p (and other miRNAs w/seed AACAGUC),miR-151-5p (and other miRNAs w/seed CGAGGAG),miR-181a-1-3p (and other miRNAs w/seed CCAUCGA),miR-181a…	18
Gastrointestinal Disease,Inflammatory Disease,Inflammatory Response,Organismal Injury and Abnormalities	ulcerative colitis	Ulcerative colitis	8.03e-05	0.00115					miR-138-5p (miRNAs w/seed GCUGGUG),miR-146b-3p (miRNAs w/seed CCCUGUG),miR-150-3p (miRNAs w/seed UGGUACA),miR-188-5p (and other miRNAs w/seed AUCCCUU),miR-27a-5p (miRNAs w/seed GGGCUUA),miR-330-3p (and other miRNAs w/seed CAAAGCA),miR-362-5p (and other miRNAs w/seed AUCCUUG),miR-450b-3p (and other miRNAs w/seed UGGGAUC),miR-501-5p (miRNAs w/seed AUCCUUU)	9
Infectious Diseases,Organismal Development	growth	Growth of human herpesvirus 1	0.0001	0.00138					miR-17-5p (and other miRNAs w/seed AAAGUGC),miR-214-3p (and other miRNAs w/seed CAGCAGG),miR-30c-5p (and other miRNAs w/seed GUAAACA)	3
Cancer,Gastrointestinal Disease,Organismal Injury and Abnormalities	colorectal cancer	Stage I colorectal cancer	0.0001	0.00138					miR-125b-5p (and other miRNAs w/seed CCCUGAG),miR-17-5p (and other miRNAs w/seed AAAGUGC),miR-34a-5p (and other miRNAs w/seed GGCAGUG)	3
Cellular Movement	migration	Migration of tumor cell lines	0.000106	0.00143	Increased	3.128			miR-10a-5p (and other miRNAs w/seed ACCCUGU),miR-122-5p (miRNAs w/seed GGAGUGU),miR-125b-5p (and other miRNAs w/seed CCCUGAG),miR-130a-3p (and other miRNAs w/seed AGUGCAA),miR-139-5p (miRNAs w/seed CUACAGU),miR-151-5p (and other miRNAs w/seed CGAGGAG),miR-17-5p (and other miRNAs w/seed AAAGUGC),miR-181a-5p (and other miRNAs w/seed ACAUUCA),miR-193a-3p (and other miRNAs w/seed ACUGGCC),miR-193a-5p…	22
Cancer,Endocrine System Disorders,Organismal Injury and Abnormalities	papillary thyroid cancer	Papillary thyroid carcinoma	0.000109	0.00144					miR-130a-3p (and other miRNAs w/seed AGUGCAA),miR-146a-3p (and other miRNAs w/seed CUCUGAA),miR-17-5p (and other miRNAs w/seed AAAGUGC),miR-181a-5p (and other miRNAs w/seed ACAUUCA),miR-30c-5p (and other miRNAs w/seed GUAAACA),miR-34a-5p (and other miRNAs w/seed GGCAGUG),miR-381-3p (and other miRNAs w/seed AUACAAG),miR-574-5p (miRNAs w/seed GAGUGUG)	8
Hereditary Disorder,Organismal Injury and Abnormalities,Renal and Urological Disease	hereditary kidney disease	Hereditary kidney disease	0.000169	0.0022					miR-100-5p (and other miRNAs w/seed ACCCGUA),miR-136-5p (miRNAs w/seed CUCCAUU),miR-17-5p (and other miRNAs w/seed AAAGUGC),miR-181a-5p (and other miRNAs w/seed ACAUUCA),miR-196a-5p (and other miRNAs w/seed AGGUAGU),miR-216a-5p (miRNAs w/seed AAUCUCA),miR-30c-5p (and other miRNAs w/seed GUAAACA),miR-34a-5p (and other miRNAs w/seed GGCAGUG),miR-362-5p (and other miRNAs w/seed AUCCUUG),miR-379-5p (…	12
Cancer,Organismal Injury and Abnormalities	solid tumor	Primary solid tumor	0.000236	0.00303					miR-1-3p (and other miRNAs w/seed GGAAUGU),miR-100-5p (and other miRNAs w/seed ACCCGUA),miR-10a-5p (and other miRNAs w/seed ACCCUGU),miR-125b-5p (and other miRNAs w/seed CCCUGAG),miR-130a-3p (and other miRNAs w/seed AGUGCAA),miR-132-3p (and other miRNAs w/seed AACAGUC),miR-17-5p (and other miRNAs w/seed AAAGUGC),miR-196a-5p (and other miRNAs w/seed AGGUAGU),miR-27a-3p (and other miRNAs w/seed UCA…	12
Metabolic Disease,Neurological Disease,Organismal Injury and Abnormalities,Psychological Disorders	Alzheimer disease	Alzheimer disease	0.00024	0.00303					miR-100-5p (and other miRNAs w/seed ACCCGUA),miR-125b-5p (and other miRNAs w/seed CCCUGAG),miR-132-3p (and other miRNAs w/seed AACAGUC),miR-17-5p (and other miRNAs w/seed AAAGUGC),miR-181a-5p (and other miRNAs w/seed ACAUUCA),miR-188-3p (miRNAs w/seed UCCCACA),miR-26a-5p (and other miRNAs w/seed UCAAGUA),miR-27a-3p (and other miRNAs w/seed UCACAGU),miR-30c-5p (and other miRNAs w/seed GUAAACA),miR…	15
Cell Cycle	G2/M phase	Arrest in G2/M phase of pancreatic cancer cell lines	0.000328	0.00406					miR-132-3p (and other miRNAs w/seed AACAGUC),miR-34a-5p (and other miRNAs w/seed GGCAGUG)	2
Cellular Growth and Proliferation	proliferation	Proliferation of eye cell lines	0.000379	0.00463	Decreased	-2	bias		miR-191-3p (miRNAs w/seed CUGCGCU),miR-200a-5p (and other miRNAs w/seed AUCUUAC),miR-874-3p (miRNAs w/seed UGCCCUG),miR-92a-3p (and other miRNAs w/seed AUUGCAC)	4
Cellular Movement	invasion	Invasion of tumor cell lines	0.0004	0.00481	Increased	3.511			miR-10a-5p (and other miRNAs w/seed ACCCUGU),miR-122-5p (miRNAs w/seed GGAGUGU),miR-125b-5p (and other miRNAs w/seed CCCUGAG),miR-138-5p (miRNAs w/seed GCUGGUG),miR-139-5p (miRNAs w/seed CUACAGU),miR-151-5p (and other miRNAs w/seed CGAGGAG),miR-17-5p (and other miRNAs w/seed AAAGUGC),miR-181a-5p (and other miRNAs w/seed ACAUUCA),miR-193a-3p (and other miRNAs w/seed ACUGGCC),miR-193a-5p (miRNAs w/…	20
Cardiovascular Disease	arrhythmogenesis	Arrhythmogenesis	0.000489	0.00566					miR-1-3p (and other miRNAs w/seed GGAAUGU),miR-133a-3p (and other miRNAs w/seed UUGGUCC)	2
Developmental Disorder,Hereditary Disorder,Organismal Injury and Abnormalities,Skeletal and Muscular Disorders	dystrophy	Dystrophy of muscle	0.000496	0.00566					miR-1-3p (and other miRNAs w/seed GGAAUGU),miR-100-5p (and other miRNAs w/seed ACCCGUA),miR-127-3p (miRNAs w/seed CGGAUCC),miR-136-3p (miRNAs w/seed AUCAUCG),miR-30a-3p (and other miRNAs w/seed UUUCAGU),miR-376c-3p (and other miRNAs w/seed ACAUAGA),miR-501-3p (and other miRNAs w/seed AUGCACC),miR-505-5p (and other miRNAs w/seed GGAGCCA),miR-532-3p (miRNAs w/seed CUCCCAC)	9
Cell Cycle,Cellular Movement	cytokinesis	Cytokinesis of ventricular myocytes	0.000498	0.00566					miR-19b-1-5p (and other miRNAs w/seed GUUUUGC),miR-515-3p (and other miRNAs w/seed AGUGCCU),miR-885-5p (miRNAs w/seed CCAUUAC)	3
Cancer,Organismal Injury and Abnormalities	neoplasia	Neoplasia of carcinoma cell lines	0.000501	0.00566		1.633			miR-125b-5p (and other miRNAs w/seed CCCUGAG),miR-17-5p (and other miRNAs w/seed AAAGUGC),miR-193a-3p (and other miRNAs w/seed ACUGGCC),miR-193a-5p (miRNAs w/seed GGGUCUU),miR-532-3p (miRNAs w/seed CUCCCAC),miR-671-5p (miRNAs w/seed GGAAGCC)	6
Cancer,Organismal Injury and Abnormalities	metastasis	Metastasis of carcinoma cell lines	0.000552	0.00607		1.342			miR-17-5p (and other miRNAs w/seed AAAGUGC),miR-193a-3p (and other miRNAs w/seed ACUGGCC),miR-193a-5p (miRNAs w/seed GGGUCUU),miR-532-3p (miRNAs w/seed CUCCCAC),miR-671-5p (miRNAs w/seed GGAAGCC)	5
Cardiovascular Disease,Organismal Injury and Abnormalities,Skeletal and Muscular Disorders	intrinsic cardiomyopathy	Intrinsic cardiomyopathy	0.000553	0.00607					miR-1-3p (and other miRNAs w/seed GGAAUGU),miR-1180-3p (miRNAs w/seed UUCCGGC),miR-1262 (and other miRNAs w/seed UGGGUGA),miR-133a-3p (and other miRNAs w/seed UUGGUCC),miR-17-5p (and other miRNAs w/seed AAAGUGC),miR-214-3p (and other miRNAs w/seed CAGCAGG),miR-26a-5p (and other miRNAs w/seed UCAAGUA),miR-3064-5p (and other miRNAs w/seed CUGGCUG),miR-30c-5p (and other miRNAs w/seed GUAAACA),miR-64…	11
Cancer,Connective Tissue Disorders,Organismal Injury and Abnormalities,Skeletal and Muscular Disorders	chordoma	Chordoma	0.000652	0.00705					miR-125b-5p (and other miRNAs w/seed CCCUGAG),miR-151-5p (and other miRNAs w/seed CGAGGAG),miR-181a-5p (and other miRNAs w/seed ACAUUCA),miR-26a-5p (and other miRNAs w/seed UCAAGUA)	4
Organismal Injury and Abnormalities,Reproductive System Disease	benign pelvic disease	Benign pelvic disease	0.000706	0.00753					miR-1-3p (and other miRNAs w/seed GGAAUGU),miR-100-5p (and other miRNAs w/seed ACCCGUA),miR-125b-5p (and other miRNAs w/seed CCCUGAG),miR-132-3p (and other miRNAs w/seed AACAGUC),miR-17-5p (and other miRNAs w/seed AAAGUGC),miR-196a-5p (and other miRNAs w/seed AGGUAGU),miR-2682-5p (and other miRNAs w/seed AGGCAGU),miR-27a-3p (and other miRNAs w/seed UCACAGU),miR-30a-3p (and other miRNAs w/seed UUU…	14
Cancer,Organismal Injury and Abnormalities	primary tumor	Primary tumor	0.000815	0.00857					miR-1-3p (and other miRNAs w/seed GGAAUGU),miR-100-5p (and other miRNAs w/seed ACCCGUA),miR-10a-5p (and other miRNAs w/seed ACCCUGU),miR-125b-5p (and other miRNAs w/seed CCCUGAG),miR-130a-3p (and other miRNAs w/seed AGUGCAA),miR-132-3p (and other miRNAs w/seed AACAGUC),miR-196a-5p (and other miRNAs w/seed AGGUAGU),miR-27a-3p (and other miRNAs w/seed UCACAGU),miR-30c-5p (and other miRNAs w/seed GU…	11
Organismal Injury and Abnormalities,Reproductive System Disease	endometriosis	Endometriosis	0.00135	0.014					miR-1-3p (and other miRNAs w/seed GGAAUGU),miR-100-5p (and other miRNAs w/seed ACCCGUA),miR-125b-5p (and other miRNAs w/seed CCCUGAG),miR-17-5p (and other miRNAs w/seed AAAGUGC),miR-196a-5p (and other miRNAs w/seed AGGUAGU),miR-2682-5p (and other miRNAs w/seed AGGCAGU),miR-30a-3p (and other miRNAs w/seed UUUCAGU),miR-34a-5p (and other miRNAs w/seed GGCAGUG),miR-34c-3p (and other miRNAs w/seed AUC…	10
Cardiovascular Disease,Cardiovascular System Development and Function,Organ Morphology,Organismal Development,Organismal Injury and Abnormalities,Skeletal and Muscular Disorders	dilated cardiomyopathy	Dilated cardiomyopathy	0.00175	0.0179					miR-1-3p (and other miRNAs w/seed GGAAUGU),miR-1180-3p (miRNAs w/seed UUCCGGC),miR-1262 (and other miRNAs w/seed UGGGUGA),miR-17-5p (and other miRNAs w/seed AAAGUGC),miR-26a-5p (and other miRNAs w/seed UCAAGUA),miR-3064-5p (and other miRNAs w/seed CUGGCUG),miR-30c-5p (and other miRNAs w/seed GUAAACA),miR-642a-3p (and other miRNAs w/seed GACACAU),miR-6894-5p (and other miRNAs w/seed GGAGGAU)	9
Cellular Movement	invasion	Invasion of cells	0.00196	0.0198	Increased	3.581			miR-10a-5p (and other miRNAs w/seed ACCCUGU),miR-122-5p (miRNAs w/seed GGAGUGU),miR-125b-5p (and other miRNAs w/seed CCCUGAG),miR-138-5p (miRNAs w/seed GCUGGUG),miR-139-5p (miRNAs w/seed CUACAGU),miR-151-5p (and other miRNAs w/seed CGAGGAG),miR-17-5p (and other miRNAs w/seed AAAGUGC),miR-181a-5p (and other miRNAs w/seed ACAUUCA),miR-193a-3p (and other miRNAs w/seed ACUGGCC),miR-193a-5p (miRNAs w/…	21
Cellular Movement	migration	Migration of hepatoma cell lines	0.00203	0.0202	Increased	2.049			miR-122-5p (miRNAs w/seed GGAGUGU),miR-151-5p (and other miRNAs w/seed CGAGGAG),miR-17-5p (and other miRNAs w/seed AAAGUGC),miR-193a-3p (and other miRNAs w/seed ACUGGCC),miR-625-5p (and other miRNAs w/seed GGGGGAA)	5
Cardiovascular Disease,Organismal Injury and Abnormalities,Reproductive System Disease	late-onset preeclampsia	Severe late-onset preeclampsia	0.00211	0.0207					miR-181a-5p (and other miRNAs w/seed ACAUUCA),miR-26a-5p (and other miRNAs w/seed UCAAGUA)	2
Dermatological Diseases and Conditions,Organismal Injury and Abnormalities	psoriasis	Psoriasis	0.00221	0.0214					miR-125a-3p (miRNAs w/seed CAGGUGA),miR-136-5p (miRNAs w/seed CUCCAUU),miR-138-5p (miRNAs w/seed GCUGGUG),miR-17-5p (and other miRNAs w/seed AAAGUGC),miR-183-3p (miRNAs w/seed UGAAUUA),miR-193a-3p (and other miRNAs w/seed ACUGGCC),miR-27a-3p (and other miRNAs w/seed UCACAGU),miR-30c-5p (and other miRNAs w/seed GUAAACA),miR-324-3p (miRNAs w/seed CCACUGC),miR-342-3p (miRNAs w/seed CUCACAC),miR-378a…	12
Cellular Development,Cellular Growth and Proliferation,Hematological System Development and Function,Hematopoiesis,Lymphoid Tissue Structure and Development,Tissue Development	differentiation	Differentiation of granulocyte progenitors	0.00288	0.0276					miR-125b-5p (and other miRNAs w/seed CCCUGAG),miR-196a-5p (and other miRNAs w/seed AGGUAGU)	2
Cell Cycle	cell cycle progression	Arrest in cell cycle progression of hepatoma cell lines	0.00331	0.0313					miR-100-5p (and other miRNAs w/seed ACCCGUA),miR-193a-3p (and other miRNAs w/seed ACUGGCC)	2
Psychological Disorders	psychological disorder	Severe psychological disorder	0.00337	0.0315					miR-132-3p (and other miRNAs w/seed AACAGUC),miR-133a-3p (and other miRNAs w/seed UUGGUCC),miR-17-5p (and other miRNAs w/seed AAAGUGC),miR-188-3p (miRNAs w/seed UCCCACA),miR-26a-5p (and other miRNAs w/seed UCAAGUA),miR-30c-5p (and other miRNAs w/seed GUAAACA),miR-3118 (and other miRNAs w/seed GUGACUG),miR-328-3p (and other miRNAs w/seed UGGCCCU),miR-34a-5p (and other miRNAs w/seed GGCAGUG),miR-38…	14
Gastrointestinal Disease,Hepatic System Disease,Organismal Injury and Abnormalities	fibrosis	Fibrosis of liver	0.00354	0.0327					miR-100-5p (and other miRNAs w/seed ACCCGUA),miR-130a-3p (and other miRNAs w/seed AGUGCAA),miR-133a-3p (and other miRNAs w/seed UUGGUCC),miR-1970 (and other miRNAs w/seed GUGUCAC),miR-27a-3p (and other miRNAs w/seed UCACAGU),miR-30c-5p (and other miRNAs w/seed GUAAACA),miR-455-3p (miRNAs w/seed CAGUCCA),miR-671-5p (miRNAs w/seed GGAAGCC)	8
Cellular Development	maturation	Maturation of chondrocyte cell lines	0.00377	0.0336					miR-30c-5p (and other miRNAs w/seed GUAAACA),miR-34a-5p (and other miRNAs w/seed GGCAGUG)	2
Dermatological Diseases and Conditions,Organismal Injury and Abnormalities	androgenic alopecia	Androgenic alopecia	0.00377	0.0336					miR-125b-5p (and other miRNAs w/seed CCCUGAG),miR-17-5p (and other miRNAs w/seed AAAGUGC)	2
Free Radical Scavenging,Molecular Transport,Small Molecule Biochemistry	release	Release of hydrogen peroxide	0.00377	0.0336					miR-100-5p (and other miRNAs w/seed ACCCGUA),miR-92a-3p (and other miRNAs w/seed AUUGCAC)	2
Cancer,Organismal Injury and Abnormalities	neoplasia	Neoplasia of tumor cell lines	0.00424	0.0373		1.105			miR-122-5p (miRNAs w/seed GGAGUGU),miR-125b-5p (and other miRNAs w/seed CCCUGAG),miR-133a-3p (and other miRNAs w/seed UUGGUCC),miR-17-5p (and other miRNAs w/seed AAAGUGC),miR-181a-5p (and other miRNAs w/seed ACAUUCA),miR-193a-3p (and other miRNAs w/seed ACUGGCC),miR-193a-5p (miRNAs w/seed GGGUCUU),miR-26a-5p (and other miRNAs w/seed UCAAGUA),miR-532-3p (miRNAs w/seed CUCCCAC),miR-671-5p (miRNAs w…	11
Cellular Development	epithelial-mesenchymal transition	Epithelial-mesenchymal transition of adenocarcinoma cell lines	0.00477	0.041					miR-193a-3p (and other miRNAs w/seed ACUGGCC),miR-193a-5p (miRNAs w/seed GGGUCUU)	2
Cancer,Cell Cycle,Organismal Injury and Abnormalities	cell cycle progression	Arrest in cell cycle progression of cancer cells	0.00477	0.041					miR-17-5p (and other miRNAs w/seed AAAGUGC),miR-26a-5p (and other miRNAs w/seed UCAAGUA)	2
Cancer,Organismal Injury and Abnormalities	metastasis	Metastasis	0.00489	0.0416		1.599			miR-1-3p (and other miRNAs w/seed GGAAUGU),miR-122-5p (miRNAs w/seed GGAGUGU),miR-125b-5p (and other miRNAs w/seed CCCUGAG),miR-130a-3p (and other miRNAs w/seed AGUGCAA),miR-133a-3p (and other miRNAs w/seed UUGGUCC),miR-138-5p (miRNAs w/seed GCUGGUG),miR-17-5p (and other miRNAs w/seed AAAGUGC),miR-193a-3p (and other miRNAs w/seed ACUGGCC),miR-193a-5p (miRNAs w/seed GGGUCUU),miR-196a-5p (and other…	19
Cancer,Organismal Injury and Abnormalities	malignant mesothelioma	Malignant mesothelioma	0.00538	0.0452					let-7e-3p (miRNAs w/seed UAUACGG),miR-340-3p (and other miRNAs w/seed CCGUCUC),miR-34a-3p (miRNAs w/seed AAUCAGC),miR-9-5p (and other miRNAs w/seed CUUUGGU)	4
Neurological Disease,Psychological Disorders	schizophrenia	Schizophrenia	0.00608	0.0506					miR-132-3p (and other miRNAs w/seed AACAGUC),miR-17-5p (and other miRNAs w/seed AAAGUGC),miR-188-3p (miRNAs w/seed UCCCACA),miR-26a-5p (and other miRNAs w/seed UCAAGUA),miR-30c-5p (and other miRNAs w/seed GUAAACA),miR-3118 (and other miRNAs w/seed GUGACUG),miR-328-3p (and other miRNAs w/seed UGGCCCU),miR-34a-5p (and other miRNAs w/seed GGCAGUG),miR-382-5p (miRNAs w/seed AAGUUGU),miR-92a-3p (and o…	10
Endocrine System Disorders,Organismal Injury and Abnormalities,Reproductive System Disease	ovarian endometriosis	Ovarian endometriosis	0.00662	0.0541					miR-1-3p (and other miRNAs w/seed GGAAUGU),miR-17-5p (and other miRNAs w/seed AAAGUGC),miR-30a-3p (and other miRNAs w/seed UUUCAGU)	3
Cancer,Organismal Injury and Abnormalities	metastatic solid tumor	Metastatic solid tumor	0.00665	0.0541		-1			miR-1-3p (and other miRNAs w/seed GGAAUGU),miR-122-5p (miRNAs w/seed GGAGUGU),miR-125b-5p (and other miRNAs w/seed CCCUGAG),miR-130a-3p (and other miRNAs w/seed AGUGCAA),miR-133a-3p (and other miRNAs w/seed UUGGUCC),miR-138-5p (miRNAs w/seed GCUGGUG),miR-196a-5p (and other miRNAs w/seed AGGUAGU),miR-26a-5p (and other miRNAs w/seed UCAAGUA),miR-27a-3p (and other miRNAs w/seed UCACAGU),miR-34a-5p (…	13
Cancer,Cell Death and Survival,Organismal Injury and Abnormalities,Tumor Morphology	apoptosis	Apoptosis of neuroblastoma cells	0.0071	0.0565					miR-125b-5p (and other miRNAs w/seed CCCUGAG),miR-17-5p (and other miRNAs w/seed AAAGUGC)	2
Cell Cycle,Embryonic Development	G1/S phase transition	G1/S phase transition of embryonic cell lines	0.0071	0.0565					miR-17-5p (and other miRNAs w/seed AAAGUGC),miR-92a-3p (and other miRNAs w/seed AUUGCAC)	2
Cancer,Organismal Injury and Abnormalities	metastasis	Metastasis of cells	0.00821	0.0647		0.788			miR-133a-3p (and other miRNAs w/seed UUGGUCC),miR-138-5p (miRNAs w/seed GCUGGUG),miR-17-5p (and other miRNAs w/seed AAAGUGC),miR-193a-3p (and other miRNAs w/seed ACUGGCC),miR-193a-5p (miRNAs w/seed GGGUCUU),miR-196a-5p (and other miRNAs w/seed AGGUAGU),miR-532-3p (miRNAs w/seed CUCCCAC),miR-671-5p (miRNAs w/seed GGAAGCC),miR-9-5p (and other miRNAs w/seed CUUUGGU)	9
Cancer,Organismal Injury and Abnormalities	metastasis	Metastasis of hepatoma cell lines	0.00841	0.0657					miR-17-5p (and other miRNAs w/seed AAAGUGC),miR-532-3p (miRNAs w/seed CUCCCAC)	2
Cardiovascular Disease,Organismal Injury and Abnormalities,Reproductive System Disease	severe preeclampsia	Severe preeclampsia	0.00941	0.0727					miR-1246 (miRNAs w/seed AUGGAUU),miR-181a-5p (and other miRNAs w/seed ACAUUCA),miR-26a-5p (and other miRNAs w/seed UCAAGUA)	3
Cellular Development,Cellular Growth and Proliferation	growth	Arrest in growth of breast cancer cell lines	0.00983	0.0727					miR-17-5p (and other miRNAs w/seed AAAGUGC),miR-27a-3p (and other miRNAs w/seed UCACAGU)	2
Developmental Disorder,Hereditary Disorder,Metabolic Disease,Organismal Injury and Abnormalities,Renal and Urological Disease	Dent disease	Dent disease	0.00983	0.0727					miR-362-5p (and other miRNAs w/seed AUCCUUG),miR-532-3p (miRNAs w/seed CUCCCAC)	2
Cellular Movement	migration	Migration of carcinoma cell lines	0.0103	0.0727		0.61			miR-125b-5p (and other miRNAs w/seed CCCUGAG),miR-17-5p (and other miRNAs w/seed AAAGUGC),miR-193a-3p (and other miRNAs w/seed ACUGGCC),miR-193a-5p (miRNAs w/seed GGGUCUU),miR-19b-1-5p (and other miRNAs w/seed GUUUUGC),miR-212-5p (miRNAs w/seed CCUUGGC),miR-574-5p (miRNAs w/seed GAGUGUG)	7
Inflammatory Disease	chronic inflammatory disorder	Chronic inflammatory disorder	0.0103	0.0727					miR-100-5p (and other miRNAs w/seed ACCCGUA),miR-130a-3p (and other miRNAs w/seed AGUGCAA),miR-138-5p (miRNAs w/seed GCUGGUG),miR-146b-3p (miRNAs w/seed CCCUGUG),miR-150-3p (miRNAs w/seed UGGUACA),miR-17-5p (and other miRNAs w/seed AAAGUGC),miR-181a-1-3p (and other miRNAs w/seed CCAUCGA),miR-181a-5p (and other miRNAs w/seed ACAUUCA),miR-188-5p (and other miRNAs w/seed AUCCCUU),miR-1970 (and other…	19
Cellular Development	epithelial-mesenchymal transition	Epithelial-mesenchymal transition of carcinoma cell lines	0.0108	0.0727					miR-17-5p (and other miRNAs w/seed AAAGUGC),miR-193a-3p (and other miRNAs w/seed ACUGGCC),miR-193a-5p (miRNAs w/seed GGGUCUU)	3
Cancer,Organismal Injury and Abnormalities	metastasis	Metastasis of adenocarcinoma cell lines	0.0114	0.0727					miR-193a-3p (and other miRNAs w/seed ACUGGCC),miR-193a-5p (miRNAs w/seed GGGUCUU)	2
Cellular Development,Cellular Growth and Proliferation	cell proliferation	Cell proliferation of carcinoma cell lines	0.0115	0.0727		1.507			miR-100-5p (and other miRNAs w/seed ACCCGUA),miR-139-5p (miRNAs w/seed CUACAGU),miR-17-5p (and other miRNAs w/seed AAAGUGC),miR-19b-1-5p (and other miRNAs w/seed GUUUUGC),miR-212-5p (miRNAs w/seed CCUUGGC),miR-26a-5p (and other miRNAs w/seed UCAAGUA),miR-30a-3p (and other miRNAs w/seed UUUCAGU),miR-30c-1-3p (and other miRNAs w/seed UGGGAGA),miR-34a-5p (and other miRNAs w/seed GGCAGUG),miR-378a-3p…	11
Cell Morphology,Cellular Function and Maintenance	autophagy	Autophagy of bone marrow cell lines	0.0115	0.0727					miR-125b-5p (and other miRNAs w/seed CCCUGAG)	1
Cell Cycle,Cellular Development,Respiratory System Development and Function	replicative senescence	Delay in initiation of replicative senescence of lung cell lines	0.0115	0.0727					miR-34a-5p (and other miRNAs w/seed GGCAGUG)	1
Tissue Development	tubulation	Tubulation by prostate cell lines	0.0115	0.0727					miR-17-5p (and other miRNAs w/seed AAAGUGC)	1
Cell Morphology,Hematological System Development and Function,Inflammatory Response	M1 polarization	M1 polarization of M2 macrophages	0.0115	0.0727					miR-125b-5p (and other miRNAs w/seed CCCUGAG)	1
Cell-To-Cell Signaling and Interaction,Cellular Assembly and Organization,Cellular Function and Maintenance,Nervous System Development and Function,Tissue Development	function	Function of GABAergic synapse	0.0115	0.0727					miR-501-3p (and other miRNAs w/seed AUGCACC)	1
Cancer,Cell-To-Cell Signaling and Interaction,Organismal Injury and Abnormalities,Tumor Morphology	sensitization	Sensitization of adenocarcinoma cells	0.0115	0.0727					miR-133a-3p (and other miRNAs w/seed UUGGUCC)	1
Auditory Disease,Hereditary Disorder,Neurological Disease,Organismal Injury and Abnormalities	nonsyndromic autosomal dominant 50 deafness	Nonsyndromic autosomal dominant 50 deafness	0.0115	0.0727					miR-96-5p (and other miRNAs w/seed UUGGCAC)	1
Infectious Diseases	cecal ligation and puncture-induced sepsis	Cecal ligation and puncture-induced sepsis	0.0115	0.0727					miR-130a-3p (and other miRNAs w/seed AGUGCAA)	1
Cell Death and Survival,Cell-To-Cell Signaling and Interaction,Cellular Assembly and Organization,Cellular Development,Cellular Function and Maintenance,Cellular Growth and Proliferation,Nervous System Development and Function,Tissue Development,Tissue Morphology	regeneration	Regeneration of neuromuscular synapse	0.0115	0.0727					miR-1-3p (and other miRNAs w/seed GGAAUGU)	1
Cancer,Cellular Response to Therapeutics,Organismal Injury and Abnormalities	chemosensitivity	Chemosensitivity of squamous cell carcinoma cell lines	0.0115	0.0727					miR-193a-5p (miRNAs w/seed GGGUCUU)	1
Cell Cycle	G1 phase	Arrest in G1 phase of distal lung epithelial cells	0.0115	0.0727					miR-570-3p (miRNAs w/seed GAAAACA)	1
Cancer,Cell Death and Survival,Organismal Injury and Abnormalities,Tumor Morphology	cell viability	Cell viability of squamous carcinoma cells	0.0115	0.0727					miR-193a-5p (miRNAs w/seed GGGUCUU)	1
Cell-To-Cell Signaling and Interaction,Cellular Growth and Proliferation,Hematological System Development and Function	induction	Induction of follicular T helper precursor cells	0.0115	0.0727					miR-92a-3p (and other miRNAs w/seed AUUGCAC)	1
Cancer,Cell-To-Cell Signaling and Interaction,Organismal Injury and Abnormalities	detachment	Detachment of cancer cells	0.0115	0.0727					miR-196a-5p (and other miRNAs w/seed AGGUAGU)	1
Cancer,Cell-To-Cell Signaling and Interaction,Organismal Injury and Abnormalities	response	Response of mammary tumor cells	0.0115	0.0727					miR-330-5p (and other miRNAs w/seed CUCUGGG)	1
Cellular Development,Cellular Growth and Proliferation	cell proliferation	Cell proliferation of tumor cell lines	0.0127	0.0796	Increased	2.565			miR-100-5p (and other miRNAs w/seed ACCCGUA),miR-10a-5p (and other miRNAs w/seed ACCCUGU),miR-122-5p (miRNAs w/seed GGAGUGU),miR-125b-5p (and other miRNAs w/seed CCCUGAG),miR-130a-3p (and other miRNAs w/seed AGUGCAA),miR-132-3p (and other miRNAs w/seed AACAGUC),miR-133a-3p (and other miRNAs w/seed UUGGUCC),miR-139-5p (miRNAs w/seed CUACAGU),miR-17-5p (and other miRNAs w/seed AAAGUGC),miR-181a-5p …	28
Cellular Development,Cellular Growth and Proliferation	cell proliferation	Cell proliferation of adenocarcinoma cell lines	0.0132	0.0814		1.067			miR-139-5p (miRNAs w/seed CUACAGU),miR-17-5p (and other miRNAs w/seed AAAGUGC),miR-30a-3p (and other miRNAs w/seed UUUCAGU),miR-34a-5p (and other miRNAs w/seed GGCAGUG)	4
Cellular Movement	invasion	Invasion of carcinoma cell lines	0.0132	0.0814		1.091			miR-125b-5p (and other miRNAs w/seed CCCUGAG),miR-138-5p (miRNAs w/seed GCUGGUG),miR-17-5p (and other miRNAs w/seed AAAGUGC),miR-193a-3p (and other miRNAs w/seed ACUGGCC),miR-193a-5p (miRNAs w/seed GGGUCUU),miR-19b-1-5p (and other miRNAs w/seed GUUUUGC),miR-212-5p (miRNAs w/seed CCUUGGC)	7
Cancer,Organismal Injury and Abnormalities	tumorigenesis	Tumorigenesis of hepatoma cell lines	0.0147	0.0896					miR-122-5p (miRNAs w/seed GGAGUGU),miR-181a-5p (and other miRNAs w/seed ACAUUCA)	2
Cancer,Hematological Disease,Immunological Disease,Organismal Injury and Abnormalities	mature T-cell neoplasm	Mature T-cell neoplasm	0.0149	0.0905					miR-10a-5p (and other miRNAs w/seed ACCCUGU),miR-132-3p (and other miRNAs w/seed AACAGUC),miR-140-5p (and other miRNAs w/seed AGUGGUU),miR-17-5p (and other miRNAs w/seed AAAGUGC),miR-181a-5p (and other miRNAs w/seed ACAUUCA),miR-192-5p (and other miRNAs w/seed UGACCUA),miR-26a-5p (and other miRNAs w/seed UCAAGUA),miR-30c-5p (and other miRNAs w/seed GUAAACA),miR-342-3p (miRNAs w/seed CUCACAC),miR-…	12
Cancer,Organismal Injury and Abnormalities	cancer	Stage I-II cancer	0.0152	0.0912					miR-125b-5p (and other miRNAs w/seed CCCUGAG),miR-17-5p (and other miRNAs w/seed AAAGUGC),miR-181a-5p (and other miRNAs w/seed ACAUUCA),miR-34a-5p (and other miRNAs w/seed GGCAGUG),miR-92a-3p (and other miRNAs w/seed AUUGCAC)	5
Cancer,Hematological Disease,Immunological Disease,Organismal Injury and Abnormalities	T-cell non-Hodgkin disease	T-cell non-Hodgkin lymphoma	0.0156	0.0919					miR-10a-5p (and other miRNAs w/seed ACCCUGU),miR-132-3p (and other miRNAs w/seed AACAGUC),miR-140-5p (and other miRNAs w/seed AGUGGUU),miR-17-5p (and other miRNAs w/seed AAAGUGC),miR-181a-5p (and other miRNAs w/seed ACAUUCA),miR-192-5p (and other miRNAs w/seed UGACCUA),miR-26a-5p (and other miRNAs w/seed UCAAGUA),miR-30c-5p (and other miRNAs w/seed GUAAACA),miR-342-3p (miRNAs w/seed CUCACAC),miR-…	12
Inflammatory Disease,Neurological Disease,Skeletal and Muscular Disorders	multiple sclerosis	Multiple Sclerosis	0.0164	0.0919					miR-125b-5p (and other miRNAs w/seed CCCUGAG),miR-17-5p (and other miRNAs w/seed AAAGUGC),miR-330-5p (and other miRNAs w/seed CUCUGGG),miR-34a-5p (and other miRNAs w/seed GGCAGUG),miR-92a-3p (and other miRNAs w/seed AUUGCAC),miR-96-5p (and other miRNAs w/seed UUGGCAC)	6
Cardiovascular Disease,Cardiovascular System Development and Function,Organ Morphology,Organismal Development,Organismal Injury and Abnormalities	enlargement	Enlargement of heart	0.0165	0.0919					miR-1-3p (and other miRNAs w/seed GGAAUGU),miR-1180-3p (miRNAs w/seed UUCCGGC),miR-1262 (and other miRNAs w/seed UGGGUGA),miR-133a-3p (and other miRNAs w/seed UUGGUCC),miR-17-5p (and other miRNAs w/seed AAAGUGC),miR-214-3p (and other miRNAs w/seed CAGCAGG),miR-26a-5p (and other miRNAs w/seed UCAAGUA),miR-3064-5p (and other miRNAs w/seed CUGGCUG),miR-30c-5p (and other miRNAs w/seed GUAAACA),miR-64…	11
Cellular Development,Hematological System Development and Function	transition	Transition of pre-pro-B lymphocytes	0.0172	0.0919					miR-132-3p (and other miRNAs w/seed AACAGUC)	1
Cell-To-Cell Signaling and Interaction,Cellular Function and Maintenance,Hematological System Development and Function,Inflammatory Response	phagocytic capacity	Phagocytic capacity of GM-CSF-dependent bone marrow-derived macrophage	0.0172	0.0919					miR-125b-5p (and other miRNAs w/seed CCCUGAG)	1
Cell-To-Cell Signaling and Interaction,Hematological System Development and Function,Immune Cell Trafficking,Inflammatory Response	activation	Activation of GM-CSF-dependent bone marrow-derived macrophage	0.0172	0.0919					miR-125b-5p (and other miRNAs w/seed CCCUGAG)	1
Cancer,Cell Cycle,Organismal Injury and Abnormalities	cell cycle progression	Arrest in cell cycle progression of gastric cancer cells	0.0172	0.0919					miR-17-5p (and other miRNAs w/seed AAAGUGC)	1
Developmental Disorder,Hereditary Disorder,Metabolic Disease,Organismal Injury and Abnormalities	hyperornithinemia-hyperammonemia-homocitrullinuria syndrome	Hyperornithinemia-hyperammonemia-homocitrullinuria syndrome	0.0172	0.0919					miR-621 (miRNAs w/seed GCUAGCA)	1
Cardiovascular System Development and Function,Organ Morphology,Skeletal and Muscular System Development and Function,Tissue Morphology	quantity	Quantity of ventricular myocytes	0.0172	0.0919					miR-1-3p (and other miRNAs w/seed GGAAUGU)	1
Cancer,Organismal Injury and Abnormalities	vasculogenic mimicry	Vasculogenic mimicry	0.0172	0.0919					miR-26a-5p (and other miRNAs w/seed UCAAGUA)	1
Cellular Development,Cellular Growth and Proliferation,Hematological System Development and Function,Hematopoiesis,Lymphoid Tissue Structure and Development,Tissue Development	differentiation	Differentiation of monocytic myeloid derived suppressor cells	0.0172	0.0919					miR-9-5p (and other miRNAs w/seed CUUUGGU)	1
Cancer	sphere formation	Sphere formation of duct cancer cell lines	0.0172	0.0919					miR-125b-5p (and other miRNAs w/seed CCCUGAG)	1
Cancer,Organismal Injury and Abnormalities	tumorigenesis	Tumorigenesis of cholangiocarcinoma cell lines	0.0172	0.0919					miR-125b-5p (and other miRNAs w/seed CCCUGAG)	1
Cancer	sphere formation	Sphere formation of cholangiocarcinoma cell lines	0.0172	0.0919					miR-125b-5p (and other miRNAs w/seed CCCUGAG)	1
Cellular Development,Cellular Growth and Proliferation,Hematological System Development and Function,Hematopoiesis,Lymphoid Tissue Structure and Development,Tissue Development	differentiation	Differentiation of polymorphonuclear granulocytic MDSC cells	0.0172	0.0919					miR-9-5p (and other miRNAs w/seed CUUUGGU)	1
Cell Morphology,Cellular Movement	cell spreading	Cell spreading of prostate cell lines	0.0172	0.0919					miR-17-5p (and other miRNAs w/seed AAAGUGC)	1
Cancer,Hematological Disease,Immunological Disease,Organismal Injury and Abnormalities	Richter syndrome	Richter syndrome	0.0174	0.0921					miR-125b-5p (and other miRNAs w/seed CCCUGAG),miR-34a-5p (and other miRNAs w/seed GGCAGUG)	2
Gastrointestinal Disease,Hepatic System Disease,Organismal Injury and Abnormalities	cirrhosis	Cirrhosis of liver	0.018	0.0944					miR-100-5p (and other miRNAs w/seed ACCCGUA),miR-130a-3p (and other miRNAs w/seed AGUGCAA),miR-1970 (and other miRNAs w/seed GUGUCAC),miR-27a-3p (and other miRNAs w/seed UCACAGU),miR-671-5p (miRNAs w/seed GGAAGCC)	5
Cell Cycle,Connective Tissue Development and Function	G1/S phase transition	G1/S phase transition of fibroblast cell lines	0.0203	0.105					miR-17-5p (and other miRNAs w/seed AAAGUGC),miR-92a-3p (and other miRNAs w/seed AUUGCAC)	2
Cancer,Organismal Injury and Abnormalities,Reproductive System Disease	mammary tumor	Mammary tumor	0.0203	0.105					miR-100-5p (and other miRNAs w/seed ACCCGUA),miR-106b-3p (miRNAs w/seed CGCACUG),miR-10a-5p (and other miRNAs w/seed ACCCUGU),miR-122b-3p (and other miRNAs w/seed AACACCA),miR-1255b-5p (and other miRNAs w/seed GGAUGAG),miR-125b-5p (and other miRNAs w/seed CCCUGAG),miR-127-3p (miRNAs w/seed CGGAUCC),miR-138-5p (miRNAs w/seed GCUGGUG),miR-139-5p (miRNAs w/seed CUACAGU),miR-140-5p (and other miRNAs …	38
Connective Tissue Disorders,Inflammatory Disease,Organismal Injury and Abnormalities,Respiratory Disease	idiopathic pulmonary fibrosis	Rapidly progressive idiopathic pulmonary fibrosis	0.0224	0.112					miR-125b-5p (and other miRNAs w/seed CCCUGAG),miR-140-5p (and other miRNAs w/seed AGUGGUU)	2
Cellular Development	maturation	Maturation of fibroblast cell lines	0.0229	0.112					miR-30c-5p (and other miRNAs w/seed GUAAACA)	1
Cell Cycle,Nervous System Development and Function	cell cycle progression	Entry into cell cycle progression of cortical neurons	0.0229	0.112					miR-26a-5p (and other miRNAs w/seed UCAAGUA)	1
Cell-To-Cell Signaling and Interaction,Cellular Growth and Proliferation,Hematological System Development and Function	suppressive capacity	Suppressive capacity of monocytic myeloid derived suppressor cells	0.0229	0.112					miR-9-5p (and other miRNAs w/seed CUUUGGU)	1
Cardiovascular Disease,Infectious Diseases,Inflammatory Disease,Organismal Injury and Abnormalities	viral myocarditis	Viral myocarditis	0.0229	0.112					miR-499-5p (and other miRNAs w/seed UAAGACU)	1
Cell Cycle	senescence	Senescence of thyroid tumor cell lines	0.0229	0.112					miR-17-5p (and other miRNAs w/seed AAAGUGC)	1
Cell Morphology,Cellular Assembly and Organization,Cellular Development,Cellular Function and Maintenance,Cellular Growth and Proliferation,Embryonic Development,Nervous System Development and Function,Organismal Development,Tissue Development,Tissue Morphology	volume	Volume of dendritic spines	0.0229	0.112					miR-138-5p (miRNAs w/seed GCUGGUG)	1
Cellular Compromise	degeneration	Degeneration of neuroblastoma cell lines	0.0229	0.112					miR-17-5p (and other miRNAs w/seed AAAGUGC)	1
Infectious Diseases,Organismal Development	growth	Growth of Human cytomegalovirus	0.0229	0.112					miR-214-3p (and other miRNAs w/seed CAGCAGG)	1
Endocrine System Disorders,Gastrointestinal Disease,Metabolic Disease,Organismal Injury and Abnormalities	diabetes mellitus	Diabetes mellitus	0.023	0.112					miR-1-3p (and other miRNAs w/seed GGAAUGU),miR-100-5p (and other miRNAs w/seed ACCCGUA),miR-122-5p (miRNAs w/seed GGAGUGU),miR-125b-5p (and other miRNAs w/seed CCCUGAG),miR-127-3p (miRNAs w/seed CGGAUCC),miR-130a-3p (and other miRNAs w/seed AGUGCAA),miR-132-3p (and other miRNAs w/seed AACAGUC),miR-133a-3p (and other miRNAs w/seed UUGGUCC),miR-17-5p (and other miRNAs w/seed AAAGUGC),miR-184 (and o…	21
Cancer	atypical hyperplasia	Atypical hyperplasia	0.0279	0.132					miR-30c-5p (and other miRNAs w/seed GUAAACA),miR-671-5p (miRNAs w/seed GGAAGCC)	2
Cellular Development,Cellular Growth and Proliferation	colony formation	Colony formation of cholangiocarcinoma cell lines	0.0286	0.132					miR-26a-5p (and other miRNAs w/seed UCAAGUA)	1
Cell Death and Survival,Hematological System Development and Function	survival	Survival of myeloid progenitor cells	0.0286	0.132					miR-328-3p (and other miRNAs w/seed UGGCCCU)	1
Cellular Development,Cellular Growth and Proliferation,Hematological System Development and Function,Hematopoiesis,Lymphoid Tissue Structure and Development,Tissue Development	granulopoiesis	Granulopoiesis of granulocyte progenitors	0.0286	0.132					miR-196a-5p (and other miRNAs w/seed AGGUAGU)	1
Cell-To-Cell Signaling and Interaction,Cellular Function and Maintenance,Hematological System Development and Function,Inflammatory Response	efferocytosis	Efferocytosis by alveolar macrophages	0.0286	0.132					miR-34a-5p (and other miRNAs w/seed GGCAGUG)	1
Cancer,Organismal Injury and Abnormalities,Skeletal and Muscular Disorders	rhabdomyosarcoma	Primary rhabdomyosarcoma	0.0286	0.132					miR-1-3p (and other miRNAs w/seed GGAAUGU)	1
Cell Cycle	cell cycle progression	Cell cycle progression of tumor cell lines	0.0286	0.132					miR-100-5p (and other miRNAs w/seed ACCCGUA),miR-137-3p (miRNAs w/seed UAUUGCU),miR-193a-3p (and other miRNAs w/seed ACUGGCC),miR-212-5p (miRNAs w/seed CCUUGGC),miR-34a-5p (and other miRNAs w/seed GGCAGUG),miR-889-3p (miRNAs w/seed UAAUAUC)	6
Cancer,Organismal Injury and Abnormalities	metastasis	Metastasis of tumor cell lines	0.0286	0.132		0.816			miR-133a-3p (and other miRNAs w/seed UUGGUCC),miR-17-5p (and other miRNAs w/seed AAAGUGC),miR-193a-3p (and other miRNAs w/seed ACUGGCC),miR-193a-5p (miRNAs w/seed GGGUCUU),miR-532-3p (miRNAs w/seed CUCCCAC),miR-671-5p (miRNAs w/seed GGAAGCC),miR-9-5p (and other miRNAs w/seed CUUUGGU)	7
Cancer,Organismal Injury and Abnormalities,Reproductive System Disease	metastasis	Metastasis of mammary tumor cells	0.0291	0.133					miR-138-5p (miRNAs w/seed GCUGGUG),miR-196a-5p (and other miRNAs w/seed AGGUAGU)	2
Cardiovascular System Development and Function,Cellular Movement	migration	Migration of microvascular endothelial cells	0.0302	0.137					miR-125b-5p (and other miRNAs w/seed CCCUGAG),miR-320b (and other miRNAs w/seed AAAGCUG)	2
Cardiovascular System Development and Function,Cell Death and Survival	cell viability	Cell viability of heart cells	0.0302	0.137					miR-27a-3p (and other miRNAs w/seed UCACAGU),miR-34a-5p (and other miRNAs w/seed GGCAGUG)	2
Inflammatory Disease,Neurological Disease,Skeletal and Muscular Disorders	relapsing-remitting multiple sclerosis	Relapsing-remitting multiple sclerosis	0.0311	0.139					miR-17-5p (and other miRNAs w/seed AAAGUGC),miR-330-5p (and other miRNAs w/seed CUCUGGG),miR-92a-3p (and other miRNAs w/seed AUUGCAC)	3
Connective Tissue Disorders,Hematological Disease,Immunological Disease,Organismal Injury and Abnormalities	immune thrombocytopenia	Immune thrombocytopenia	0.0311	0.139					miR-125b-5p (and other miRNAs w/seed CCCUGAG),miR-150-3p (miRNAs w/seed UGGUACA),miR-671-5p (miRNAs w/seed GGAAGCC)	3
Cell Cycle	cell cycle progression	Arrest in cell cycle progression	0.0314	0.139					miR-100-5p (and other miRNAs w/seed ACCCGUA),miR-137-3p (miRNAs w/seed UAUUGCU),miR-17-5p (and other miRNAs w/seed AAAGUGC),miR-193a-3p (and other miRNAs w/seed ACUGGCC),miR-26a-5p (and other miRNAs w/seed UCAAGUA),miR-34a-5p (and other miRNAs w/seed GGCAGUG)	6
Cell Morphology,Organ Morphology,Skeletal and Muscular System Development and Function,Tissue Morphology	area	Area of muscle cells	0.0314	0.139					miR-125b-5p (and other miRNAs w/seed CCCUGAG),miR-184 (and other miRNAs w/seed GGACGGA)	2
Cancer,Cellular Response to Therapeutics,Organismal Injury and Abnormalities	chemosensitivity	Chemosensitivity of cancer cells	0.0342	0.144					miR-196a-5p (and other miRNAs w/seed AGGUAGU)	1
Small Molecule Biochemistry	efficacy	Efficacy of methotrexate	0.0342	0.144					miR-192-5p (and other miRNAs w/seed UGACCUA)	1
Cancer,Hematological Disease,Immunological Disease,Organismal Injury and Abnormalities	formation	Onset of formation of B-cell lymphoma	0.0342	0.144					miR-17-5p (and other miRNAs w/seed AAAGUGC)	1
Cancer,Cell Death and Survival,Organismal Injury and Abnormalities,Tumor Morphology	apoptosis	Apoptosis of gastric cancer cells	0.0342	0.144					miR-17-5p (and other miRNAs w/seed AAAGUGC)	1
Cell-To-Cell Signaling and Interaction,Cellular Function and Maintenance,Hematological System Development and Function,Hematopoiesis,Inflammatory Response	efferocytosis	Efferocytosis of thymocytes	0.0342	0.144					miR-34a-5p (and other miRNAs w/seed GGCAGUG)	1
Cell Cycle	G1 phase	Arrest in G1 phase of bladder cancer cell lines	0.0342	0.144					miR-381-3p (and other miRNAs w/seed AUACAAG)	1
Cellular Movement	migration	Migration of duct cancer cell lines	0.0342	0.144					miR-125b-5p (and other miRNAs w/seed CCCUGAG)	1
Cancer,Cellular Response to Therapeutics,Organismal Injury and Abnormalities	chemotherapy resistance	Chemotherapy resistance of colorectal cancer cell lines	0.0342	0.144					miR-17-5p (and other miRNAs w/seed AAAGUGC)	1
Cancer,Neurological Disease,Organismal Injury and Abnormalities	anaplastic astrocytoma	Anaplastic astrocytoma	0.0351	0.148					miR-10a-5p (and other miRNAs w/seed ACCCUGU),miR-26a-5p (and other miRNAs w/seed UCAAGUA)	2
Cardiovascular Disease,Connective Tissue Disorders,Dermatological Diseases and Conditions,Immunological Disease,Inflammatory Disease,Organismal Injury and Abnormalities,Skeletal and Muscular Disorders	systemic sclerosis	Systemic sclerosis	0.036	0.151					miR-1-3p (and other miRNAs w/seed GGAAUGU),miR-125b-5p (and other miRNAs w/seed CCCUGAG),miR-196a-5p (and other miRNAs w/seed AGGUAGU)	3
Cellular Movement	migration	Migration of adenocarcinoma cell lines	0.0364	0.151					miR-193a-3p (and other miRNAs w/seed ACUGGCC),miR-193a-5p (miRNAs w/seed GGGUCUU)	2
Cell Cycle	cell cycle progression	Arrest in cell cycle progression of tumor cell lines	0.0374	0.155					miR-100-5p (and other miRNAs w/seed ACCCGUA),miR-137-3p (miRNAs w/seed UAUUGCU),miR-193a-3p (and other miRNAs w/seed ACUGGCC),miR-34a-5p (and other miRNAs w/seed GGCAGUG)	4
Cellular Movement	migration	Migration of bladder cancer cell lines	0.039	0.158					miR-139-5p (miRNAs w/seed CUACAGU),miR-381-3p (and other miRNAs w/seed AUACAAG)	2
Cell-mediated Immune Response,Cellular Development,Cellular Function and Maintenance,Cellular Growth and Proliferation,Embryonic Development,Hematological System Development and Function,Hematopoiesis,Lymphoid Tissue Structure and Development,Organ Development,Organismal Development,Tissue Development	development	Arrest in development of double-negative T lymphocyte	0.0397	0.158					miR-34a-5p (and other miRNAs w/seed GGCAGUG)	1
Cancer,Gastrointestinal Disease,Organismal Injury and Abnormalities	advanced colorectal adenoma	Advanced colorectal adenoma	0.0397	0.158					miR-92a-3p (and other miRNAs w/seed AUUGCAC)	1
Cell Cycle,Cell-To-Cell Signaling and Interaction,Hematological System Development and Function,Inflammatory Response	effector phase	Effector phase of natural killer cells	0.0397	0.158					miR-27a-5p (miRNAs w/seed GGGCUUA)	1
Cell Morphology,Cellular Function and Maintenance	autophagy	Autophagy of leukocyte cell lines	0.0397	0.158					miR-125b-5p (and other miRNAs w/seed CCCUGAG)	1
Cell Morphology,Organ Morphology,Skeletal and Muscular System Development and Function,Tissue Morphology	area	Area of myofiber	0.0397	0.158					miR-125b-5p (and other miRNAs w/seed CCCUGAG)	1
Cancer,Cellular Development,Organismal Injury and Abnormalities,Tumor Morphology	differentiation	Differentiation of acute myeloid leukemia blast cells	0.0397	0.158					miR-34a-5p (and other miRNAs w/seed GGCAGUG)	1
Cellular Development,Cellular Growth and Proliferation,Organ Development,Reproductive System Development and Function,Tissue Development	proliferation	Proliferation of ovarian surface epithelial cells	0.0397	0.158					miR-34a-5p (and other miRNAs w/seed GGCAGUG)	1
Cell Morphology	conversion	Conversion of neurons	0.0453	0.176					miR-9-5p (and other miRNAs w/seed CUUUGGU)	1
Cellular Development,Cellular Growth and Proliferation,Connective Tissue Development and Function,Tissue Development	proliferation	Proliferation of epiphyseal chondrocytes	0.0453	0.176					miR-379-5p (and other miRNAs w/seed GGUAGAC)	1
Organismal Functions,Organismal Injury and Abnormalities,Tissue Morphology	closure	Closure of scratch lesion	0.0453	0.176					miR-184 (and other miRNAs w/seed GGACGGA)	1
Cell-To-Cell Signaling and Interaction	responsiveness	Responsiveness of natural killer cells	0.0453	0.176					miR-27a-5p (miRNAs w/seed GGGCUUA)	1
Cellular Development,Cellular Growth and Proliferation	proliferation	Proliferation of thyroid tumor cell lines	0.0486	0.188					miR-17-5p (and other miRNAs w/seed AAAGUGC),miR-574-5p (miRNAs w/seed GAGUGUG)	2

## Sheet: Supplementary Table 5
Supplementary Table 5. Salivary miRNAs differentially expressed in patients with HCC and chronic liver disease (n=11) vs. patients with cirrhosis without HCC (n=19) (FDR P <.05).
miRNA	Log2 FC	Log2 FC SE	P value	FDR P value	Detected only in chronic liver disease1
hsa-mir-122	-6.6505029	1.71252537	1.39E-07	7.54E-05	N
hsa-mir-122b	-6.642017	1.71714752	1.46E-07	7.54E-05	N
hsa-miR-122-5p	-6.6411275	1.71786637	1.48E-07	7.54E-05	N
hsa-miR-122b-3p	-6.6411275	1.71786637	1.48E-07	7.54E-05	N
hsa-mir-603	-4.8636043	2.77128684	2.81E-07	0.00011449	N
hsa-mir-766	-6.4465383	2.55668933	5.37E-07	0.00018252	N					1 Y denotes miRNAs that were only detected as being statistically significant (FDR P<.05) when comparing patients with HCC and chronic liver disease versus patients with cirrhosis. N denotes miRNAs that were detected in both the subset analysis of patients with HCC and chronic liver disease versus cirrhosis and HCC patients with or without chronic liver disease versus cirrhosis (Supplemental Tabl…
hsa-mir-3648-2	-5.8785402	2.3872383	1.21E-06	0.00033138	N
hsa-mir-6806	-7.6203794	2.68284583	1.30E-06	0.00033138	N
hsa-mir-3648-1	-8.4644655	3.34876388	2.20E-06	0.0004966	N
hsa-miR-766-3p	-5.8812206	2.86761115	2.43E-06	0.0004966	N
hsa-mir-184	-1.000853	1.49612905	4.15E-06	0.00063779	N
hsa-miR-184	-1.000853	1.49612905	4.15E-06	0.00063779	N
hsa-mir-1290	-7.2448493	2.48496833	4.38E-06	0.00063779	N
hsa-miR-1290	-7.2448493	2.48496833	4.38E-06	0.00063779	N
hsa-miR-1246	-5.1596957	2.36792501	4.88E-06	0.00066337	N
hsa-mir-10401	-9.0382501	3.98293125	6.49E-06	0.00082691	N
hsa-mir-4449	-4.3378159	3.25446055	8.02E-06	0.00096289	N
hsa-miR-12136	-3.7997152	1.15475956	9.57E-06	0.00108426	N
hsa-miR-6806-5p	-4.7036971	3.50295143	1.29E-05	0.00134417	N
hsa-miR-191-3p	-2.7224166	1.77716176	1.32E-05	0.00134417	N
hsa-miR-133a-3p	-4.9681084	2.02123856	1.45E-05	0.00141107	N
hsa-miR-6839-5p	-1.1547985	1.91010494	1.69E-05	0.00149544	N
hsa-miR-642a-3p	-0.528832	1.12733178	1.90E-05	0.00149544	N
hsa-miR-642b-5p	-0.528832	1.12733178	1.90E-05	0.00149544	N
hsa-mir-1246	-1.6784416	2.92751751	2.03E-05	0.00149544	N
hsa-miR-454-5p	-2.4460118	1.08544827	2.10E-05	0.00149544	N
hsa-mir-12136	-3.5135586	1.11908341	2.11E-05	0.00149544	N
hsa-mir-642a	-0.5178211	1.1105559	2.13E-05	0.00149544	N
hsa-mir-642b	-0.5178211	1.1105559	2.13E-05	0.00149544	N
hsa-mir-3615	-3.7703947	2.13518849	2.28E-05	0.00149715	N
hsa-miR-3615	-3.7703947	2.13518849	2.28E-05	0.00149715	N
hsa-miR-146b-3p	-1.0914023	1.41790486	2.43E-05	0.00155178	N
hsa-miR-4449	-2.5153007	3.72248992	2.92E-05	0.00180404	N
hsa-miR-5187-5p	-0.8844923	1.21995843	3.33E-05	0.00195393	N
hsa-miR-130b-5p	-1.2759136	1.27199478	3.35E-05	0.00195393	N
hsa-mir-1180	-0.4587708	1.09031163	3.92E-05	0.00220737	N
hsa-miR-769-3p	-1.0073649	1.26078651	4.00E-05	0.00220737	N
hsa-miR-1180-3p	-0.4454341	1.07576673	4.99E-05	0.00260915	N
hsa-mir-1306	-3.5262396	2.81588198	5.13E-05	0.00260915	N
hsa-mir-4765	-0.5369332	1.14010773	5.24E-05	0.00260915	N
hsa-miR-874-3p	-0.7890938	1.21628354	5.24E-05	0.00260915	N
hsa-let-7e-3p	0.04568664	0.95311767	6.09E-05	0.00296026	N
hsa-miR-1293	-0.247105	0.92174908	6.50E-05	0.00308266	N
hsa-mir-6839	-5.8216739	3.88902619	7.75E-05	0.00357108	N
hsa-miR-1306-5p	-2.6261211	5.42626194	8.01E-05	0.00357108	N
hsa-mir-138-1	-0.2064383	0.97665237	8.23E-05	0.00357108	N
hsa-miR-1976	-1.5970679	1.37643493	8.49E-05	0.00357108	N
hsa-mir-484	-3.0648656	2.08446573	8.58E-05	0.00357108	N
hsa-miR-484	-3.0648656	2.08446573	8.58E-05	0.00357108	N
hsa-mir-8059	-1.0488855	1.44380536	0.00010008	0.00408313	N
hsa-miR-212-5p	-0.0795744	0.9526479	0.00010229	0.00409142	N
hsa-miR-125a-5p	-2.9823114	0.97833179	0.00010923	0.00428529	N
hsa-miR-10401-3p	-0.7821466	1.46875176	0.00011509	0.00442984	N
hsa-miR-8059	-1.0292286	1.39022062	0.0001209	0.00456721	N
hsa-mir-212	-0.0601267	0.94476373	0.00012472	0.00462592	N
hsa-miR-326	-1.401281	1.54790905	0.00013042	0.00463372	N
hsa-mir-548i-2	-6.2213892	2.59475076	0.00013166	0.00463372	N
hsa-miR-643	-0.7023891	1.06709662	0.0001324	0.00463372	N
hsa-mir-6894	-0.6536258	1.22317586	0.00013401	0.00463372	N
hsa-mir-3198-2	-3.6679196	2.86627484	0.00014372	0.0048065	N
hsa-miR-3198	-3.6679196	2.86627484	0.00014372	0.0048065	N
hsa-mir-125a	-2.8964123	0.983923	0.00015533	0.00511093	N
hsa-miR-138-5p	-0.6071951	1.0685063	0.00015855	0.00513401	N
hsa-mir-1287	-0.5147687	0.96614974	0.00016194	0.00516173	N
hsa-miR-671-3p	-1.1081925	1.70418203	0.0001739	0.00545784	N
hsa-mir-4326	-0.5702118	1.15784771	0.00018338	0.00566198	N
hsa-mir-1181	-1.0354715	1.67531977	0.00018596	0.00566198	N
hsa-mir-127	-0.8604393	1.5417605	0.00020045	0.00601359	N
hsa-miR-664b-3p	-1.1438912	0.99874208	0.00022565	0.00667138	N
hsa-miR-4326	-0.5163095	1.12777181	0.00023557	0.00686531	N
hsa-mir-5187	-0.714447	1.08902934	0.00023971	0.0068875	N
hsa-mir-548h-4	-0.2037569	1.00626804	0.00025438	0.00720731	N
hsa-mir-6504	-2.3011302	1.9265973	0.00027014	0.00752001	N
hsa-miR-148a-5p	-0.4002564	0.85637833	0.00027278	0.00752001	N
hsa-miR-4492	-9.0683434	3.64525205	0.00028231	0.00767893	N
hsa-mir-874	-1.2136593	1.91802902	0.00029675	0.00796548	N
hsa-miR-6894-5p	-0.6677491	1.30277112	0.00030744	0.00807029	N
hsa-mir-505	-2.7223827	1.4801604	0.00030857	0.00807029	N
hsa-mir-134	-0.4610101	1.11840909	0.00031384	0.00810426	N
hsa-miR-127-3p	-0.9054893	1.6250967	0.00033185	0.00846217	N
hsa-miR-30a-3p	-2.6615969	1.35250221	0.00034072	0.00858106	N
hsa-miR-2277-3p	-0.6905365	1.2198636	0.00034709	0.0086349	N
hsa-mir-4785	0.06023551	0.93036026	0.00037503	0.00903245	N
hsa-miR-4785	0.06023551	0.93036026	0.00037503	0.00903245	N
hsa-mir-326	-1.1214997	1.31131978	0.00038102	0.00903245	N
hsa-miR-550a-5p	-0.859175	1.3679838	0.00038521	0.00903245	N
hsa-miR-550b-3p	-0.859175	1.3679838	0.00038521	0.00903245	N
hsa-miR-10b-5p	-1.4909932	1.96283215	0.00041391	0.00959517	N
hsa-mir-92b	-0.3990012	1.06149384	0.00042202	0.00966812	N
hsa-mir-10397	-0.287193	0.96836188	0.00043005	0.00966812	N
hsa-miR-548h-5p	-0.2376134	1.02776431	0.00043127	0.00966812	N
hsa-mir-3684	-0.8266385	1.43680582	0.00043749	0.00970083	N
hsa-mir-376c	-0.0716407	0.9570438	0.00044385	0.00973606	N
hsa-mir-761	-3.3948668	2.1312091	0.0004631	0.00988509	N
hsa-miR-761	-3.3948668	2.1312091	0.0004631	0.00988509	N
hsa-mir-4492	-8.2725123	3.5431677	0.00046766	0.00988509	N
hsa-mir-10b	-1.4838219	1.93001346	0.00047003	0.00988509	N
hsa-miR-3173-5p	-0.639293	1.20467995	0.00048544	0.01010518	N
hsa-mir-320d-2	-1.28984	1.48693915	0.00051225	0.01019761	N
hsa-mir-5001	-0.6594968	1.2190696	0.00051443	0.01019761	N
hsa-miR-5001-3p	-0.6594968	1.2190696	0.00051443	0.01019761	N
hsa-miR-330-5p	-0.3956446	0.92873175	0.00051606	0.01019761	N
hsa-miR-3150b-3p	-1.4971013	1.36569024	0.00052448	0.01019761	N
hsa-miR-3150a-5p	-1.4971013	1.36569024	0.00052448	0.01019761	N
hsa-mir-9902-1	-1.1361246	2.01003838	0.00053351	0.01019761	N
hsa-mir-9902-2	-1.1361246	2.01003838	0.00053351	0.01019761	N
hsa-miR-532-3p	-1.1735818	1.06729863	0.00053487	0.01019761	N
hsa-miR-6504-5p	-1.3113186	1.6564393	0.00054934	0.01028789	N
hsa-mir-1271	-0.514519	1.04074912	0.00055474	0.01028789	N
hsa-miR-1271-5p	-0.514519	1.04074912	0.00055474	0.01028789	N
hsa-mir-4465	-0.731108	1.36644732	0.00057351	0.01054017	N
hsa-miR-3065-3p	-1.3669578	0.99181825	0.00061114	0.01103289	Y
hsa-miR-338-5p	-1.3669578	0.99181825	0.00061114	0.01103289	Y
hsa-miR-134-5p	-0.4474933	1.12219088	0.00062492	0.01117691	N
hsa-mir-1-1	-2.1345097	1.88929695	0.00063007	0.01117691	N
hsa-miR-505-5p	-2.700131	2.50308508	0.00064221	0.01129409	N
hsa-miR-6894-3p	-0.5012812	1.13143943	0.00067757	0.01181397	N
hsa-miR-92b-3p	-0.3747311	1.03171376	0.00069417	0.01200082	N
hsa-mir-325	-8.5950045	3.44277428	0.00071294	0.01222176	N
hsa-mir-196a-2	-1.0981051	1.73608807	0.00076409	0.01298946	N
hsa-miR-342-3p	-2.3123525	1.09929515	0.00078086	0.01310194	N
hsa-miR-10397-5p	-0.253159	0.96774014	0.00078355	0.01310194	N
hsa-mir-1-2	-2.0702161	1.94732953	0.00081365	0.01336007	N
hsa-mir-323a	-0.2446354	1.0517812	0.00082156	0.01336007	N
hsa-mir-10398	-0.4388238	1.09300312	0.00082525	0.01336007	N
hsa-miR-10398-3p	-0.4388238	1.09300312	0.00082525	0.01336007	N
hsa-mir-664b	-1.2893145	0.76697619	0.0008318	0.01336007	N
hsa-miR-4487	-0.561302	1.10867334	0.00083828	0.01336007	N
hsa-mir-7706	-0.0263706	0.958137	0.00085723	0.01340507	N
hsa-miR-7706	-0.0263706	0.958137	0.00085723	0.01340507	N
hsa-let-7a-2-3p	-0.2114609	0.94058787	0.00086082	0.01340507	N
hsa-miR-18a-3p	-0.1948361	1.00690718	0.0008711	0.01346239	N
hsa-mir-409	-0.0745066	0.9813269	0.00089367	0.01370749	N
hsa-miR-885-5p	-0.599975	1.20979988	0.00091189	0.0138623	N
hsa-mir-6514	-0.235953	1.02403253	0.00091736	0.0138623	N
hsa-miR-4765	-0.263707	1.04458037	0.00096236	0.01433527	N
hsa-mir-3173	-0.5147997	1.08417643	0.00096271	0.01433527	N
hsa-mir-6818	-0.538999	0.99569236	0.00098646	0.01458238	N
hsa-mir-1976	-0.9392144	1.28204553	0.00102033	0.01482801	N
hsa-mir-548h-3	-0.1557008	1.00610227	0.00102801	0.01482801	N
hsa-mir-641	-0.1210455	0.86656661	0.0010295	0.01482801	N
hsa-mir-382	-0.314947	1.02292315	0.00103827	0.01482801	N
hsa-miR-1306-3p	-0.7119053	1.23049613	0.00104999	0.01482801	N
hsa-miR-10399-3p	-1.2168408	1.54608057	0.00107201	0.01482801	N
hsa-miR-4521	-0.1469076	1.00113345	0.00109084	0.01482801	N
hsa-miR-1287-5p	0.05785036	0.90586014	0.00109217	0.01482801	N
hsa-mir-1293	-0.09494	0.84750549	0.00110103	0.01482801	N
hsa-mir-4521	-0.1493715	1.00140706	0.00110112	0.01482801	N
hsa-mir-3136	-0.0545249	0.88777099	0.00111059	0.01482801	N
hsa-miR-3136-5p	-0.0545249	0.88777099	0.00111059	0.01482801	N
hsa-miR-34a-3p	-1.0031987	1.01537599	0.00112097	0.01482801	N
hsa-mir-1226	-0.1658367	1.00908929	0.00112179	0.01482801	N
hsa-miR-1226-3p	-0.1658367	1.00908929	0.00112179	0.01482801	N
hsa-mir-514a-1	-0.3691727	1.00750299	0.0011247	0.01482801	N
hsa-miR-574-5p	-0.122107	0.90930951	0.00113362	0.01482801	N
hsa-miR-200c-5p	-0.2373015	0.78728321	0.00113391	0.01482801	Y
hsa-miR-324-3p	-0.7814549	1.23383724	0.00115005	0.01494327	N
hsa-mir-2110	-1.0202885	1.5199873	0.00116137	0.01499488	N
hsa-mir-548h-1	-0.2171292	1.03922695	0.0012722	0.01632257	N
hsa-miR-6510-3p	0.23602796	0.89382265	0.00130897	0.01668933	Y
hsa-miR-190b-5p	-2.1662374	1.4159493	0.00134878	0.01691665	N
hsa-miR-3684	0.00200864	0.9866124	0.00135638	0.01691665	N
hsa-mir-342	-2.1586266	1.08991458	0.00135969	0.01691665	N
hsa-mir-320c-1	0.12677607	0.95224138	0.00135997	0.01691665	N
hsa-mir-190b	-2.1512615	1.41650119	0.00139594	0.01725889	N
hsa-miR-1-3p	-1.9673288	1.97606806	0.00144007	0.01769727	N
hsa-mir-138-2	-0.4310929	1.04561429	0.00150488	0.01830748	N
hsa-miR-4773	-0.8522062	1.41349738	0.00150768	0.01830748	N
hsa-miR-30c-1-3p	-0.2549065	0.90926169	0.00153139	0.01848538	N
hsa-mir-3655	-0.7649027	1.38806125	0.00159919	0.01885055	N
hsa-mir-3928	-0.0957941	0.97762946	0.00161915	0.01885055	N
hsa-miR-3928-3p	-0.0957941	0.97762946	0.00161915	0.01885055	N
hsa-mir-320e	0.1273846	0.987994	0.00162472	0.01885055	N
hsa-miR-320e	0.1273846	0.987994	0.00162472	0.01885055	N
hsa-miR-6516-3p	-0.2075402	0.91261956	0.00164733	0.01885055	N
hsa-mir-4776-2	-0.1116455	0.93452232	0.00165404	0.01885055	N
hsa-miR-4776-5p	-0.1116455	0.93452232	0.00165404	0.01885055	N
hsa-miR-4776-3p	-0.1116455	0.93452232	0.00165404	0.01885055	N
hsa-mir-4776-1	-0.1116455	0.93452232	0.00165404	0.01885055	N
hsa-mir-339	-1.3678182	1.63201871	0.00167833	0.01902111	N
hsa-mir-7155	0.00396884	0.94589818	0.00170091	0.01907205	N
hsa-miR-455-3p	-0.3994887	1.00033754	0.00171054	0.01907205	N
hsa-mir-4698	-0.7113644	1.29267255	0.0017161	0.01907205	N
hsa-mir-4662b	0.12541047	0.95769561	0.00172957	0.01907205	N
hsa-mir-4662a	0.12541047	0.95769561	0.00172957	0.01907205	N
hsa-miR-339-5p	-1.3405935	1.63128921	0.00175684	0.01920518	N
hsa-let-7c-3p	0.05225173	0.97229476	0.0017623	0.01920518	N
hsa-miR-625-3p	-1.4359677	1.14082918	0.00176989	0.01920518	N
hsa-miR-4662b	0.1294984	0.95873855	0.00182862	0.01963357	N
hsa-miR-4662a-5p	0.1294984	0.95873855	0.00182862	0.01963357	N
hsa-mir-6803	-0.4060362	1.11479882	0.00185913	0.01975321	N
hsa-miR-6803-3p	-0.4060362	1.11479882	0.00185913	0.01975321	N
hsa-miR-183-3p	-0.0848348	0.90600082	0.00192693	0.02026859	N
hsa-mir-1270	-0.500439	1.10699045	0.0019397	0.02026859	N
hsa-mir-378i	-0.2373376	0.7931304	0.00194609	0.02026859	N
hsa-mir-1255a	-0.3794095	0.93571081	0.00194812	0.02026859	N
hsa-mir-5699	0.07460886	0.97531509	0.00196326	0.02026859	N
hsa-mir-4773-1	-0.7849858	1.28522462	0.00198197	0.02026859	N
hsa-mir-4773-2	-0.7849858	1.28522462	0.00198197	0.02026859	N
hsa-mir-3605	-0.9831192	1.58355181	0.00200604	0.02026859	N
hsa-mir-133a-2	-4.4930178	1.98254004	0.00201195	0.02026859	N
hsa-miR-3609	-0.4115801	0.99632001	0.00201863	0.02026859	N
hsa-miR-93-3p	-1.5637503	1.43511523	0.00203204	0.02026859	N
hsa-miR-10396a-5p	-0.4821709	1.16126008	0.00204599	0.02026859	N
hsa-mir-30a	-1.9159181	1.1546937	0.00205959	0.02026859	N
hsa-miR-618	-0.8802421	1.23620121	0.00206223	0.02026859	N
hsa-mir-6510	0.28036776	0.90641137	0.0020646	0.02026859	Y
hsa-mir-194-1	-0.351141	0.8507018	0.0020666	0.02026859	N
hsa-miR-146a-3p	-0.0933178	0.96638143	0.00208344	0.020336	N
hsa-mir-10399	-1.1406677	1.3218195	0.00209855	0.02038588	N
hsa-mir-6511a-3	-0.3689342	1.04676148	0.0021145	0.02044354	N
hsa-mir-618	-0.8729444	1.22996132	0.00215138	0.02070192	N
hsa-mir-548i-1	-0.9105857	1.68984736	0.00218315	0.02090908	N
hsa-miR-9902	-0.8772866	1.64013764	0.00221793	0.02114285	N
hsa-miR-3605-3p	-0.4291981	1.10910831	0.00223862	0.0212409	N
hsa-miR-641	0.15241879	0.94412975	0.00229503	0.02167524	N
hsa-mir-139	-0.4456824	1.09168252	0.00234976	0.02204494	N
hsa-miR-339-3p	-0.1853431	0.87787818	0.00235578	0.02204494	N
hsa-mir-7850	-0.4922464	1.08276999	0.00237221	0.02209725	N
hsa-miR-328-3p	-1.7727794	1.87767392	0.00246967	0.02290053	N
hsa-mir-328	-1.764518	1.87462944	0.00248577	0.02294553	N
hsa-miR-629-3p	-0.3841216	1.00549996	0.00256129	0.02353617	N
hsa-mir-3609	-0.3630532	0.97461368	0.00257683	0.0235728	N
hsa-miR-150-3p	-0.6012385	1.19938538	0.00263593	0.0240058	N
hsa-mir-514a-2	0.02074072	0.97499457	0.00274093	0.02474115	N
hsa-mir-514a-3	0.02074072	0.97499457	0.00274093	0.02474115	N
hsa-mir-3128	0.1154833	0.95415948	0.00277211	0.02491233	N
hsa-miR-181c-3p	-0.8964619	0.76282132	0.00281319	0.02502736	N
hsa-miR-625-5p	-1.2341951	1.16915914	0.00282821	0.02502736	N
hsa-miR-501-3p	-0.5355861	0.7731424	0.00282849	0.02502736	N
hsa-miR-664b-5p	-0.8552837	0.90623544	0.00284093	0.02502736	N
hsa-miR-942-5p	-1.0520806	1.17029454	0.00284625	0.02502736	N
hsa-miR-550a-3-5p	-0.1366727	0.98205464	0.00291574	0.02552839	N
hsa-mir-3660	-0.3054102	0.94208373	0.00294513	0.02567551	N
hsa-mir-550a-1	-0.5095947	1.07516697	0.00300626	0.02594474	N
hsa-mir-550b-1	-0.5095947	1.07516697	0.00300626	0.02594474	N
hsa-mir-4766	-0.1679319	0.97286221	0.00301417	0.02594474	N
hsa-miR-549a-3p	0.15972108	0.91271208	0.00312452	0.02678159	N
hsa-miR-6727-5p	-0.8021647	1.33238755	0.00314306	0.02682777	N
hsa-mir-4690	-0.1083719	1.00211737	0.00315676	0.02683244	N
hsa-miR-323a-3p	-0.173911	1.03453927	0.00318473	0.02695785	N
hsa-mir-449a	-0.4884417	1.14675237	0.00324936	0.0270821	N
hsa-mir-942	-1.0161281	1.15113178	0.00326186	0.0270821	N
hsa-miR-449a	-0.4902987	1.15059102	0.00330057	0.0270821	N
hsa-mir-548l	-0.2001628	0.91636178	0.0033009	0.0270821	N
hsa-miR-548l	-0.2001628	0.91636178	0.0033009	0.0270821	N
hsa-miR-3613-3p	0.06297403	0.85986836	0.00330242	0.0270821	N
hsa-mir-4659a	-0.5364425	1.0224999	0.00330561	0.0270821	N
hsa-mir-4659b	-0.5364425	1.0224999	0.00330561	0.0270821	N
hsa-miR-548aw	-0.0425407	0.99261084	0.00340112	0.02766356	N
hsa-miR-1537-5p	0.25742933	0.97175019	0.0034037	0.02766356	N
hsa-mir-597	-0.0008519	0.97108713	0.00348462	0.02820887	N
hsa-miR-3064-5p	0.01595773	0.89491145	0.00350218	0.02823894	N
hsa-mir-34b	-0.5599584	1.15167388	0.0035699	0.02856565	N
hsa-mir-6512	0.15618044	0.9370927	0.00357071	0.02856565	N
hsa-mir-625	-1.4330754	1.16756139	0.00360907	0.02871016	N
hsa-mir-671	-0.836814	1.10609273	0.00362748	0.02871016	N
hsa-mir-548i-3	-0.7326611	1.44684059	0.00364023	0.02871016	N
hsa-mir-6727	-0.447059	1.03204524	0.0036581	0.02871016	N
hsa-miR-1843	-0.3186377	0.73079744	0.00365914	0.02871016	N
hsa-mir-643	0.26904972	0.85822368	0.00376957	0.02944	N
hsa-miR-664a-3p	-1.7012197	0.9598503	0.00379517	0.02944	N
hsa-miR-135b-3p	0.08136482	0.87743734	0.00379545	0.02944	N
hsa-miR-597-5p	-0.0980144	1.00281558	0.0038298	0.0295494	N
hsa-mir-6516	-0.0999829	0.88368624	0.00387507	0.0295494	N
hsa-mir-3155a	-0.3433058	1.0675818	0.00388082	0.0295494	N
hsa-mir-3155b	-0.3433058	1.0675818	0.00388082	0.0295494	N
hsa-miR-6842-3p	-0.2826488	0.94179275	0.00388198	0.0295494	N
hsa-mir-550b-2	-0.4966801	1.05961335	0.00393323	0.02971775	N
hsa-mir-550a-2	-0.4966801	1.05961335	0.00393323	0.02971775	N
hsa-mir-10396a	-0.3834269	1.06248126	0.00398201	0.0299753	N
hsa-miR-140-5p	0.16619938	0.65999059	0.00408442	0.03063314	N
hsa-mir-6842	-0.2777783	0.93956169	0.00414983	0.03090343	N
hsa-mir-3064	0.04700293	0.89064335	0.00415075	0.03090343	N
hsa-miR-378i	0.0009429	0.79276754	0.0042909	0.0318307	N
hsa-mir-548aw	0.11503747	0.97133581	0.00434467	0.03211276	N
hsa-mir-6869	-0.0991738	0.98931375	0.0043686	0.0321731	N
hsa-miR-6869-5p	-0.0795934	0.98794316	0.00443114	0.03243209	N
hsa-miR-23a-5p	0.30160052	0.97856129	0.00444893	0.03243209	N
hsa-miR-6512-5p	0.16663446	0.9443849	0.00445146	0.03243209	N
hsa-mir-381	-0.3208227	1.0325882	0.0045182	0.03271668	N
hsa-mir-1294	-0.1710215	0.93849978	0.00454157	0.03271668	N
hsa-mir-3138	-0.1602049	0.98770006	0.00455001	0.03271668	N
hsa-miR-100-5p	-1.8729297	1.53353923	0.00460229	0.03271668	N
hsa-miR-589-3p	-0.1077695	0.79416158	0.00460366	0.03271668	N
hsa-mir-3150a	-0.7803425	1.16418741	0.00460409	0.03271668	N
hsa-mir-100	-1.8717357	1.53329368	0.00460799	0.03271668	N
hsa-mir-30d	-1.0773301	0.49569991	0.00461883	0.03271668	N
hsa-miR-6818-3p	-0.4989558	1.02605312	0.00468312	0.032966	N
hsa-mir-135a-1	0.16194803	0.93922179	0.00468666	0.032966	N
hsa-miR-30d-5p	-1.0822873	0.50066335	0.00470372	0.032966	N
hsa-miR-34c-3p	-0.2043747	1.03972572	0.00471866	0.032966	N
hsa-miR-7850-5p	-0.5062724	1.12447172	0.00476692	0.03318949	N
hsa-mir-6513	-0.1329371	0.94907393	0.00487804	0.0338476	N
hsa-miR-188-3p	0.03389674	0.96008346	0.00495691	0.0342664	N
hsa-mir-548t	-0.0574052	0.95964942	0.00501068	0.0342664	N
hsa-miR-548t-5p	-0.0574052	0.95964942	0.00501068	0.0342664	N
hsa-miR-3138	-0.1490169	0.98613895	0.0050107	0.0342664	N
hsa-miR-27b-5p	0.07925177	0.97728721	0.00502238	0.0342664	N
hsa-miR-196a-5p	-0.7477831	1.30298899	0.00510802	0.03473454	N
hsa-miR-500a-5p	0.00749871	0.82825832	0.00518142	0.0350914	N
hsa-mir-1295a	-0.1484318	0.98427189	0.00522663	0.0350914	N
hsa-mir-1295b	-0.1484318	0.98427189	0.00522663	0.0350914	N
hsa-miR-106b-3p	-1.4485103	1.38104423	0.00522931	0.0350914	N
hsa-mir-1278	0.08790293	0.96601831	0.00541042	0.0360695	N
hsa-miR-1278	0.08790293	0.96601831	0.00541042	0.0360695	N
hsa-miR-9-5p	-2.0683241	1.13789268	0.00545123	0.03622313	N
hsa-miR-744-3p	-0.0503685	0.89515997	0.00550647	0.03646966	Y
hsa-mir-9-3	-1.2189805	1.01231373	0.00552408	0.03646966	N
hsa-mir-4791	-0.3229327	0.97041024	0.00560473	0.0366871	N
hsa-miR-4791	-0.3229327	0.97041024	0.00560473	0.0366871	N
hsa-miR-549a-5p	0.23738147	0.98269133	0.00561307	0.0366871	N
hsa-mir-664a	-1.4554042	0.71182319	0.00564386	0.0366871	N
hsa-mir-1249	-0.0801189	0.9984091	0.00566842	0.0366871	N
hsa-miR-1249-3p	-0.0801189	0.9984091	0.00566842	0.0366871	N
hsa-mir-33b	-0.2356469	0.80153624	0.00569353	0.0366871	Y
hsa-miR-454-3p	0.51866803	0.64449563	0.00570089	0.0366871	N
hsa-miR-409-3p	-0.0088666	0.98396892	0.00585313	0.03754841	N
hsa-miR-3614-3p	-0.3601466	0.89814456	0.00591857	0.03784919	Y
hsa-mir-3143	0.17954052	0.96283316	0.0059868	0.03816583	N
hsa-mir-10393	-0.2173874	1.01446329	0.00626068	0.03955065	N
hsa-mir-1262	0.21825954	0.81153402	0.00626219	0.03955065	N
hsa-miR-1262	0.21825954	0.81153402	0.00626219	0.03955065	N
hsa-miR-3143	0.0911215	0.97081657	0.00629305	0.03962288	N
hsa-mir-550a-3	-0.2750397	0.99967934	0.00643375	0.04038413	N
hsa-mir-216a	0.1887426	0.95847863	0.0065092	0.04050551	N
hsa-miR-216a-5p	0.1887426	0.95847863	0.0065092	0.04050551	N
hsa-miR-1284	-0.0812354	0.96795955	0.00651265	0.04050551	N
hsa-miR-34b-3p	-0.2803657	1.04476807	0.00663664	0.04115118	N
hsa-miR-30a-5p	-1.4432511	1.15162845	0.00671514	0.04151176	N
hsa-miR-502-5p	0.16100468	0.9872022	0.00676218	0.04162404	N
hsa-miR-548j-3p	-0.0842509	1.00401874	0.00677411	0.04162404	Y
hsa-mir-215	-0.1760874	0.9158021	0.00681641	0.04175818	N
hsa-miR-222-5p	0.15921311	0.99545544	0.00690368	0.04215212	N
hsa-miR-362-5p	-0.5244615	0.65306429	0.00692204	0.04215212	N
hsa-miR-502-3p	-0.5961953	0.64158171	0.00695163	0.04220632	Y
hsa-miR-215-5p	-0.1813993	0.91744378	0.00700344	0.04239469	N
hsa-mir-135a-2	0.34077468	0.92968243	0.00704248	0.04249472	N
hsa-mir-3927	0.02865136	0.97669929	0.00708245	0.04249472	N
hsa-miR-3927-3p	0.02865136	0.97669929	0.00708245	0.04249472	N
hsa-miR-589-5p	-0.5154222	0.69944923	0.00711104	0.04254115	N
hsa-mir-187	-0.3325402	0.93387339	0.00721718	0.04304983	Y
hsa-miR-4677-5p	0.06806685	0.99022879	0.00724496	0.04308953	Y
hsa-miR-627-3p	-0.2609226	0.91604101	0.00734483	0.04355655	N
hsa-mir-744	-1.4005672	1.01289753	0.00738956	0.04360259	Y
hsa-mir-579	-0.2938575	0.97330984	0.00741832	0.04360259	N
hsa-miR-6806-3p	-0.3561465	1.10270935	0.00743046	0.04360259	N
hsa-miR-187-3p	-0.3240209	0.93372204	0.00743809	0.04360259	Y
hsa-miR-99a-3p	-0.4030876	0.77941962	0.00757847	0.0442982	Y
hsa-miR-1270	-0.0582728	0.9938206	0.00760525	0.04430482	N
hsa-mir-4487	-0.4272524	1.06422382	0.00762304	0.04430482	N
hsa-mir-501	-0.3790572	0.75056138	0.00773631	0.04483542	N
hsa-miR-23b-5p	-0.1432405	0.7381139	0.00797633	0.0459865	N
hsa-miR-671-5p	-0.5263858	0.97002413	0.00801606	0.0459865	N
hsa-mir-549a	0.28750472	0.88525021	0.00802275	0.0459865	N
hsa-miR-744-5p	-1.3447083	0.98959052	0.0080251	0.0459865	Y
hsa-miR-1250-5p	0.08440076	0.91722132	0.00818842	0.04670256	N
hsa-mir-675	0.58805008	1.03743304	0.00821812	0.04670256	Y
hsa-mir-6788	-0.2951517	1.05014529	0.00824163	0.04670256	N
hsa-miR-6788-5p	-0.2951517	1.05014529	0.00824163	0.04670256	N
hsa-mir-4676	-0.2367659	1.00354274	0.00841425	0.04754867	N
hsa-mir-4802	0.01468632	0.97148015	0.00849149	0.04780851	N
hsa-mir-4775	0.49984522	1.08633283	0.0085071	0.04780851	N
hsa-mir-3679	0.08970487	0.94908968	0.00861484	0.04812356	N
hsa-mir-4520-1	-0.0127619	0.97962609	0.00871621	0.04812356	N
hsa-miR-4520-5p	-0.0127619	0.97962609	0.00871621	0.04812356	N
hsa-mir-4520-2	-0.0127619	0.97962609	0.00871621	0.04812356	N
hsa-miR-675-3p	0.6143706	1.0591376	0.00871653	0.04812356	Y
hsa-miR-4775	0.38418339	1.04027161	0.00874256	0.04812356	N
hsa-mir-411	-0.1137899	1.01390764	0.00875331	0.04812356	N
hsa-mir-2277	0.31857131	0.85598181	0.00876417	0.04812356	Y
hsa-miR-345-5p	-1.1256536	1.3422826	0.00880486	0.04812356	Y
hsa-miR-4802-5p	0.01662482	0.97163777	0.00882165	0.04812356	N
hsa-mir-1250	0.09865338	0.91598924	0.00882265	0.04812356	N
hsa-miR-27a-5p	-1.271423	1.58273948	0.00889818	0.0484061	N
hsa-mir-345	-1.120249	1.33850309	0.00893606	0.04848289	Y
hsa-miR-99b-3p	-0.3771865	0.83174511	0.00908057	0.04913624	N
hsa-miR-99b-5p	-1.4144367	1.22188948	0.00925362	0.04992188	N
hsa-miR-193a-5p	-0.7662045	1.01233519	0.0092747	0.04992188	N

## Sheet: Supplementary Table 6
Supplementary Table 6. miRNA enrichment in disease and cancer-specific pathways in HCC+CLD
Categories	Functions	Diseases or Functions Annotation	p-value	B-H p-value	Predicted Activation State	Activation z-score	Flags	Bias-corrected z-score	Molecules	# Molecules
Organismal Injury and Abnormalities,Reproductive System Disease	nonobstructive azoospermia	Nonobstructive azoospermia	1.14e-23	7.29e-21					miR-1-3p (and other miRNAs w/seed GGAAUGU),miR-130a-3p (and other miRNAs w/seed AGUGCAA),miR-130b-5p (and other miRNAs w/seed CUCUUUC),miR-132-3p (and other miRNAs w/seed AACAGUC),miR-187-3p (miRNAs w/seed CGUGUCU),miR-18a-3p (and other miRNAs w/seed CUGCCCU),miR-190a-5p (and other miRNAs w/seed GAUAUGU),miR-191-3p (miRNAs w/seed CUGCGCU),miR-196a-5p (and other miRNAs w/seed AGGUAGU),miR-30a-3p (…	23
Cancer,Organismal Injury and Abnormalities,Reproductive System Disease	invasive cervical squamous cell carcinoma	Early stage invasive cervical squamous cell carcinoma	1.47e-18	4.69e-16					miR-10a-5p (and other miRNAs w/seed ACCCUGU),miR-130a-3p (and other miRNAs w/seed AGUGCAA),miR-132-3p (and other miRNAs w/seed AACAGUC),miR-133a-3p (and other miRNAs w/seed UUGGUCC),miR-187-3p (miRNAs w/seed CGUGUCU),miR-192-5p (and other miRNAs w/seed UGACCUA),miR-214-3p (and other miRNAs w/seed CAGCAGG),miR-26a-5p (and other miRNAs w/seed UCAAGUA),miR-30c-5p (and other miRNAs w/seed GUAAACA),mi…	14
Cancer,Gastrointestinal Disease,Organismal Injury and Abnormalities,Respiratory Disease	squamous cell cancer of the hypopharynx	Hypopharyngeal squamous cell carcinoma	7.72e-17	1.49e-14					miR-1-3p (and other miRNAs w/seed GGAAUGU),miR-100-5p (and other miRNAs w/seed ACCCGUA),miR-10a-5p (and other miRNAs w/seed ACCCUGU),miR-125b-5p (and other miRNAs w/seed CCCUGAG),miR-130a-3p (and other miRNAs w/seed AGUGCAA),miR-139-5p (miRNAs w/seed CUACAGU),miR-140-5p (and other miRNAs w/seed AGUGGUU),miR-196a-5p (and other miRNAs w/seed AGGUAGU),miR-214-3p (and other miRNAs w/seed CAGCAGG),miR…	14
Neurological Disease,Organismal Injury and Abnormalities,Psychological Disorders	sporadic amyotrophic lateral sclerosis	Sporadic amyotrophic lateral sclerosis	9.33e-17	1.49e-14					miR-1-3p (and other miRNAs w/seed GGAAUGU),miR-100-5p (and other miRNAs w/seed ACCCGUA),miR-106b-3p (miRNAs w/seed CGCACUG),miR-1246 (miRNAs w/seed AUGGAUU),miR-1249-3p (and other miRNAs w/seed CGCCCUU),miR-130a-3p (and other miRNAs w/seed AGUGCAA),miR-132-3p (and other miRNAs w/seed AACAGUC),miR-146a-3p (and other miRNAs w/seed CUCUGAA),miR-26a-5p (and other miRNAs w/seed UCAAGUA),miR-30c-5p (an…	16
Psychological Disorders	sporadic psychological disorder	Sporadic psychological disorder	1.32e-16	1.69e-14					miR-1-3p (and other miRNAs w/seed GGAAUGU),miR-100-5p (and other miRNAs w/seed ACCCGUA),miR-106b-3p (miRNAs w/seed CGCACUG),miR-1246 (miRNAs w/seed AUGGAUU),miR-1249-3p (and other miRNAs w/seed CGCCCUU),miR-130a-3p (and other miRNAs w/seed AGUGCAA),miR-132-3p (and other miRNAs w/seed AACAGUC),miR-146a-3p (and other miRNAs w/seed CUCUGAA),miR-26a-5p (and other miRNAs w/seed UCAAGUA),miR-30c-5p (an…	17
Inflammatory Disease,Inflammatory Response,Organismal Injury and Abnormalities,Renal and Urological Disease	lupus nephritis	Class II lupus nephritis	2.13e-16	2.27e-14					miR-100-5p (and other miRNAs w/seed ACCCGUA),miR-130a-3p (and other miRNAs w/seed AGUGCAA),miR-133a-3p (and other miRNAs w/seed UUGGUCC),miR-184 (and other miRNAs w/seed GGACGGA),miR-30c-5p (and other miRNAs w/seed GUAAACA),miR-3118 (and other miRNAs w/seed GUGACUG),miR-324-3p (miRNAs w/seed CCACUGC),miR-325-5p (and other miRNAs w/seed CUAGUAG),miR-344a-5p (and other miRNAs w/seed CAGGCUC),miR-34…	14
Neurological Disease,Organismal Injury and Abnormalities,Psychological Disorders	amyotrophic lateral sclerosis	Amyotrophic lateral sclerosis	2.84e-15	2.59e-13					miR-1-3p (and other miRNAs w/seed GGAAUGU),miR-100-5p (and other miRNAs w/seed ACCCGUA),miR-106b-3p (miRNAs w/seed CGCACUG),miR-1246 (miRNAs w/seed AUGGAUU),miR-1249-3p (and other miRNAs w/seed CGCCCUU),miR-1290 (miRNAs w/seed GGAUUUU),miR-130a-3p (and other miRNAs w/seed AGUGCAA),miR-132-3p (and other miRNAs w/seed AACAGUC),miR-146a-3p (and other miRNAs w/seed CUCUGAA),miR-214-3p (and other miRN…	22
Neurological Disease	sporadic neurological disorder	Sporadic neurological disorder	5.75e-15	4.59e-13					miR-1-3p (and other miRNAs w/seed GGAAUGU),miR-100-5p (and other miRNAs w/seed ACCCGUA),miR-106b-3p (miRNAs w/seed CGCACUG),miR-1246 (miRNAs w/seed AUGGAUU),miR-1249-3p (and other miRNAs w/seed CGCCCUU),miR-130a-3p (and other miRNAs w/seed AGUGCAA),miR-132-3p (and other miRNAs w/seed AACAGUC),miR-146a-3p (and other miRNAs w/seed CUCUGAA),miR-26a-5p (and other miRNAs w/seed UCAAGUA),miR-30c-5p (an…	17
Neurological Disease	progressive motor neuropathy	Progressive motor neuropathy	5.93e-13	4.21e-11					miR-1-3p (and other miRNAs w/seed GGAAUGU),miR-100-5p (and other miRNAs w/seed ACCCGUA),miR-106b-3p (miRNAs w/seed CGCACUG),miR-1246 (miRNAs w/seed AUGGAUU),miR-1249-3p (and other miRNAs w/seed CGCCCUU),miR-125b-5p (and other miRNAs w/seed CCCUGAG),miR-1290 (miRNAs w/seed GGAUUUU),miR-130a-3p (and other miRNAs w/seed AGUGCAA),miR-132-3p (and other miRNAs w/seed AACAGUC),miR-146a-3p (and other miR…	26
Skeletal and Muscular System Development and Function,Tissue Morphology	quantity	Quantity of muscle cell lines	1.94e-12	1.24e-10	Increased	2.53	bias	1.415	miR-125b-5p (and other miRNAs w/seed CCCUGAG),miR-130b-5p (and other miRNAs w/seed CUCUUUC),miR-133a-3p (and other miRNAs w/seed UUGGUCC),miR-339-5p (and other miRNAs w/seed CCCUGUC),miR-342-3p (miRNAs w/seed CUCACAC),miR-501-3p (and other miRNAs w/seed AUGCACC),miR-532-3p (miRNAs w/seed CUCCCAC),miR-625-3p (miRNAs w/seed ACUAUAG),miR-629-3p (miRNAs w/seed UUCUCCC),miR-885-5p (miRNAs w/seed CCAUU…	10
Cancer,Organismal Injury and Abnormalities	solid tumor	Early stage solid tumor	4.32e-12	2.51e-10					miR-10a-5p (and other miRNAs w/seed ACCCUGU),miR-125b-5p (and other miRNAs w/seed CCCUGAG),miR-130a-3p (and other miRNAs w/seed AGUGCAA),miR-132-3p (and other miRNAs w/seed AACAGUC),miR-133a-3p (and other miRNAs w/seed UUGGUCC),miR-187-3p (miRNAs w/seed CGUGUCU),miR-192-5p (and other miRNAs w/seed UGACCUA),miR-214-3p (and other miRNAs w/seed CAGCAGG),miR-26a-5p (and other miRNAs w/seed UCAAGUA),m…	15
Neurological Disease,Organismal Injury and Abnormalities	progressive encephalopathy	Progressive encephalopathy	5.52e-12	2.94e-10					miR-1-3p (and other miRNAs w/seed GGAAUGU),miR-100-5p (and other miRNAs w/seed ACCCGUA),miR-106b-3p (miRNAs w/seed CGCACUG),miR-1246 (miRNAs w/seed AUGGAUU),miR-1249-3p (and other miRNAs w/seed CGCCCUU),miR-125b-5p (and other miRNAs w/seed CCCUGAG),miR-1290 (miRNAs w/seed GGAUUUU),miR-130a-3p (and other miRNAs w/seed AGUGCAA),miR-132-3p (and other miRNAs w/seed AACAGUC),miR-146a-3p (and other miR…	30
Neurological Disease	neurological disorder	Progressive neurological disorder	9.18e-12	4.51e-10					miR-1-3p (and other miRNAs w/seed GGAAUGU),miR-100-5p (and other miRNAs w/seed ACCCGUA),miR-106b-3p (miRNAs w/seed CGCACUG),miR-1246 (miRNAs w/seed AUGGAUU),miR-1249-3p (and other miRNAs w/seed CGCCCUU),miR-125b-5p (and other miRNAs w/seed CCCUGAG),miR-1290 (miRNAs w/seed GGAUUUU),miR-130a-3p (and other miRNAs w/seed AGUGCAA),miR-132-3p (and other miRNAs w/seed AACAGUC),miR-146a-3p (and other miR…	32
Cellular Development,Skeletal and Muscular System Development and Function	differentiation	Differentiation of muscle cell lines	1.89e-10	8.62e-09	Increased	2.673		2.214	miR-100-5p (and other miRNAs w/seed ACCCGUA),miR-125b-5p (and other miRNAs w/seed CCCUGAG),miR-130b-5p (and other miRNAs w/seed CUCUUUC),miR-133a-3p (and other miRNAs w/seed UUGGUCC),miR-192-5p (and other miRNAs w/seed UGACCUA),miR-339-5p (and other miRNAs w/seed CCCUGUC),miR-342-3p (miRNAs w/seed CUCACAC),miR-455-3p (miRNAs w/seed CAGUCCA),miR-501-3p (and other miRNAs w/seed AUGCACC),miR-532-3p …	14
Neurological Disease,Organismal Injury and Abnormalities,Psychological Disorders	chronic epilepsy	Chronic epilepsy	2.11e-10	8.97e-09					miR-100-5p (and other miRNAs w/seed ACCCGUA),miR-125b-5p (and other miRNAs w/seed CCCUGAG),miR-127-3p (miRNAs w/seed CGGAUCC),miR-132-3p (and other miRNAs w/seed AACAGUC),miR-1839-5p (and other miRNAs w/seed AGGUAGA),miR-1843a-5p (and other miRNAs w/seed AUGGAGG),miR-33-5p (and other miRNAs w/seed UGCAUUG),miR-378a-3p (and other miRNAs w/seed CUGGACU),miR-92a-3p (and other miRNAs w/seed AUUGCAC)	9
Neurological Disease,Organismal Injury and Abnormalities	kainic acid-induced epileptic seizure	Kainic acid-induced epileptic seizure	2.77e-10	1.11e-08					miR-100-5p (and other miRNAs w/seed ACCCGUA),miR-10a-5p (and other miRNAs w/seed ACCCUGU),miR-125b-5p (and other miRNAs w/seed CCCUGAG),miR-132-3p (and other miRNAs w/seed AACAGUC),miR-1839-5p (and other miRNAs w/seed AGGUAGA),miR-30c-5p (and other miRNAs w/seed GUAAACA),miR-378a-3p (and other miRNAs w/seed CUGGACU),miR-92a-3p (and other miRNAs w/seed AUUGCAC)	8
Cancer,Organismal Injury and Abnormalities	primary melanoma	Primary melanoma	1.24e-09	4.41e-08					miR-100-5p (and other miRNAs w/seed ACCCGUA),miR-10a-5p (and other miRNAs w/seed ACCCUGU),miR-125b-5p (and other miRNAs w/seed CCCUGAG),miR-130a-3p (and other miRNAs w/seed AGUGCAA),miR-132-3p (and other miRNAs w/seed AACAGUC),miR-196a-5p (and other miRNAs w/seed AGGUAGU),miR-9-5p (and other miRNAs w/seed CUUUGGU),miR-92a-3p (and other miRNAs w/seed AUUGCAC)	8
Cancer,Connective Tissue Disorders,Organismal Injury and Abnormalities	dedifferentiated liposarcoma	Dedifferentiated liposarcoma	1.24e-09	4.41e-08					miR-127-3p (miRNAs w/seed CGGAUCC),miR-190a-5p (and other miRNAs w/seed GAUAUGU),miR-193a-5p (miRNAs w/seed GGGUCUU),miR-26a-5p (and other miRNAs w/seed UCAAGUA),miR-34a-5p (and other miRNAs w/seed GGCAGUG),miR-376c-3p (and other miRNAs w/seed ACAUAGA),miR-378a-3p (and other miRNAs w/seed CUGGACU),miR-409-3p (miRNAs w/seed AAUGUUG)	8
Neurological Disease,Organismal Injury and Abnormalities	kainic acid-induced epileptic seizure	Chronic phase kainic acid-induced epileptic seizure	4.64e-09	1.56e-07					miR-100-5p (and other miRNAs w/seed ACCCGUA),miR-125b-5p (and other miRNAs w/seed CCCUGAG),miR-132-3p (and other miRNAs w/seed AACAGUC),miR-1839-5p (and other miRNAs w/seed AGGUAGA),miR-30c-5p (and other miRNAs w/seed GUAAACA),miR-378a-3p (and other miRNAs w/seed CUGGACU),miR-92a-3p (and other miRNAs w/seed AUUGCAC)	7
Developmental Disorder,Hereditary Disorder,Organismal Injury and Abnormalities,Skeletal and Muscular Disorders	LMNA-related congenital muscular dystrophy	LMNA-related congenital muscular dystrophy	6.03e-09	1.93e-07					miR-100-5p (and other miRNAs w/seed ACCCGUA),miR-127-3p (miRNAs w/seed CGGAUCC),miR-376c-3p (and other miRNAs w/seed ACAUAGA),miR-501-3p (and other miRNAs w/seed AUGCACC),miR-505-5p (and other miRNAs w/seed GGAGCCA),miR-532-3p (miRNAs w/seed CUCCCAC)	6
Neurological Disease,Organismal Injury and Abnormalities	pilocarpine-induced status epilepticus	Chronic phase pilocarpine-induced status epilepticus	8.78e-09	2.67e-07					miR-100-5p (and other miRNAs w/seed ACCCGUA),miR-125b-5p (and other miRNAs w/seed CCCUGAG),miR-132-3p (and other miRNAs w/seed AACAGUC),miR-1839-5p (and other miRNAs w/seed AGGUAGA),miR-30c-5p (and other miRNAs w/seed GUAAACA),miR-33-5p (and other miRNAs w/seed UGCAUUG),miR-378a-3p (and other miRNAs w/seed CUGGACU)	7
Cancer,Organismal Injury and Abnormalities	carcinoma	Invasive carcinoma	1.51e-08	4.22e-07					miR-10a-5p (and other miRNAs w/seed ACCCUGU),miR-130a-3p (and other miRNAs w/seed AGUGCAA),miR-132-3p (and other miRNAs w/seed AACAGUC),miR-133a-3p (and other miRNAs w/seed UUGGUCC),miR-187-3p (miRNAs w/seed CGUGUCU),miR-192-5p (and other miRNAs w/seed UGACCUA),miR-214-3p (and other miRNAs w/seed CAGCAGG),miR-26a-5p (and other miRNAs w/seed UCAAGUA),miR-30c-5p (and other miRNAs w/seed GUAAACA),mi…	15
Cancer,Hematological Disease,Hereditary Disorder,Organismal Injury and Abnormalities	myelodysplastic syndrome with isolated del(5q)	Myelodysplastic syndrome with isolated del(5q)	1.52e-08	4.22e-07					miR-100-5p (and other miRNAs w/seed ACCCGUA),miR-10a-5p (and other miRNAs w/seed ACCCUGU),miR-125b-5p (and other miRNAs w/seed CCCUGAG),miR-130a-3p (and other miRNAs w/seed AGUGCAA),miR-34a-5p (and other miRNAs w/seed GGCAGUG),miR-378a-3p (and other miRNAs w/seed CUGGACU)	6
Cancer,Hematological Disease,Immunological Disease,Organismal Injury and Abnormalities	nasal type extranodal NK-/T-cell lymphoma	Nasal type extranodal NK-/T-cell lymphoma	3.58e-08	9.53e-07					miR-10a-5p (and other miRNAs w/seed ACCCUGU),miR-132-3p (and other miRNAs w/seed AACAGUC),miR-140-5p (and other miRNAs w/seed AGUGGUU),miR-192-5p (and other miRNAs w/seed UGACCUA),miR-26a-5p (and other miRNAs w/seed UCAAGUA),miR-30c-5p (and other miRNAs w/seed GUAAACA),miR-342-3p (miRNAs w/seed CUCACAC),miR-378a-3p (and other miRNAs w/seed CUGGACU),miR-92a-3p (and other miRNAs w/seed AUUGCAC)	9
Inflammatory Response	inflammation	Inflammation of absolute anatomical region	8.85e-08	2.26e-06					miR-100-5p (and other miRNAs w/seed ACCCGUA),miR-130a-3p (and other miRNAs w/seed AGUGCAA),miR-133a-3p (and other miRNAs w/seed UUGGUCC),miR-138-5p (miRNAs w/seed GCUGGUG),miR-140-5p (and other miRNAs w/seed AGUGGUU),miR-146b-3p (miRNAs w/seed CCCUGUG),miR-150-3p (miRNAs w/seed UGGUACA),miR-184 (and other miRNAs w/seed GGACGGA),miR-1970 (and other miRNAs w/seed GUGUCAC),miR-27a-5p (miRNAs w/seed …	28
Cancer,Organismal Injury and Abnormalities	metastatic melanoma cancer	Metastatic melanoma	1.07e-07	2.63e-06					miR-1-3p (and other miRNAs w/seed GGAAUGU),miR-125b-5p (and other miRNAs w/seed CCCUGAG),miR-130a-3p (and other miRNAs w/seed AGUGCAA),miR-133a-3p (and other miRNAs w/seed UUGGUCC),miR-138-5p (miRNAs w/seed GCUGGUG),miR-196a-5p (and other miRNAs w/seed AGGUAGU),miR-34a-5p (and other miRNAs w/seed GGCAGUG),miR-92a-3p (and other miRNAs w/seed AUUGCAC),miR-96-5p (and other miRNAs w/seed UUGGCAC)	9
Cancer,Organismal Injury and Abnormalities,Reproductive System Disease	cervical squamous cell carcinoma	Cervical squamous cell carcinoma	3.27e-07	7.74e-06					miR-10a-5p (and other miRNAs w/seed ACCCUGU),miR-130a-3p (and other miRNAs w/seed AGUGCAA),miR-132-3p (and other miRNAs w/seed AACAGUC),miR-133a-3p (and other miRNAs w/seed UUGGUCC),miR-187-3p (miRNAs w/seed CGUGUCU),miR-192-5p (and other miRNAs w/seed UGACCUA),miR-214-3p (and other miRNAs w/seed CAGCAGG),miR-26a-5p (and other miRNAs w/seed UCAAGUA),miR-30a-3p (and other miRNAs w/seed UUUCAGU),mi…	15
Cancer,Organismal Injury and Abnormalities	cancer	Invasive cancer	7.13e-07	1.63e-05					miR-10a-5p (and other miRNAs w/seed ACCCUGU),miR-130a-3p (and other miRNAs w/seed AGUGCAA),miR-132-3p (and other miRNAs w/seed AACAGUC),miR-133a-3p (and other miRNAs w/seed UUGGUCC),miR-187-3p (miRNAs w/seed CGUGUCU),miR-192-5p (and other miRNAs w/seed UGACCUA),miR-196a-5p (and other miRNAs w/seed AGGUAGU),miR-214-3p (and other miRNAs w/seed CAGCAGG),miR-26a-5p (and other miRNAs w/seed UCAAGUA),m…	17
Endocrine System Disorders,Gastrointestinal Disease,Metabolic Disease,Organismal Injury and Abnormalities	non-insulin-dependent diabetes mellitus	Non-insulin-dependent diabetes mellitus	1.18e-06	2.6e-05					miR-1-3p (and other miRNAs w/seed GGAAUGU),miR-100-5p (and other miRNAs w/seed ACCCGUA),miR-125b-5p (and other miRNAs w/seed CCCUGAG),miR-127-3p (miRNAs w/seed CGGAUCC),miR-130a-3p (and other miRNAs w/seed AGUGCAA),miR-132-3p (and other miRNAs w/seed AACAGUC),miR-133a-3p (and other miRNAs w/seed UUGGUCC),miR-184 (and other miRNAs w/seed GGACGGA),miR-190a-5p (and other miRNAs w/seed GAUAUGU),miR-3…	14
Inflammatory Response,Organismal Injury and Abnormalities	inflammation	Inflammation of organ	1.23e-06	2.62e-05					miR-100-5p (and other miRNAs w/seed ACCCGUA),miR-130a-3p (and other miRNAs w/seed AGUGCAA),miR-133a-3p (and other miRNAs w/seed UUGGUCC),miR-138-5p (miRNAs w/seed GCUGGUG),miR-140-5p (and other miRNAs w/seed AGUGGUU),miR-146b-3p (miRNAs w/seed CCCUGUG),miR-150-3p (miRNAs w/seed UGGUACA),miR-184 (and other miRNAs w/seed GGACGGA),miR-1970 (and other miRNAs w/seed GUGUCAC),miR-27a-5p (miRNAs w/seed …	28
Cancer,Gastrointestinal Disease,Organismal Injury and Abnormalities	colorectal cancer	Advanced Dukes' stage colorectal cancer	1.44e-06	2.97e-05					miR-125b-5p (and other miRNAs w/seed CCCUGAG),miR-330-5p (and other miRNAs w/seed CUCUGGG),miR-344a-5p (and other miRNAs w/seed CAGGCUC),miR-92a-3p (and other miRNAs w/seed AUUGCAC)	4
Inflammatory Response	inflammation	Inflammation of body cavity	2.23e-06	4.46e-05					miR-100-5p (and other miRNAs w/seed ACCCGUA),miR-130a-3p (and other miRNAs w/seed AGUGCAA),miR-133a-3p (and other miRNAs w/seed UUGGUCC),miR-138-5p (miRNAs w/seed GCUGGUG),miR-146b-3p (miRNAs w/seed CCCUGUG),miR-150-3p (miRNAs w/seed UGGUACA),miR-184 (and other miRNAs w/seed GGACGGA),miR-1970 (and other miRNAs w/seed GUGUCAC),miR-27a-5p (miRNAs w/seed GGGCUUA),miR-30c-5p (and other miRNAs w/seed …	23
Cancer,Organismal Injury and Abnormalities	invasive tumor	Invasive tumor	3.61e-06	6.98e-05		-1.373		-1.782	miR-1-3p (and other miRNAs w/seed GGAAUGU),miR-10a-5p (and other miRNAs w/seed ACCCUGU),miR-122-5p (miRNAs w/seed GGAGUGU),miR-125b-5p (and other miRNAs w/seed CCCUGAG),miR-130a-3p (and other miRNAs w/seed AGUGCAA),miR-132-3p (and other miRNAs w/seed AACAGUC),miR-133a-3p (and other miRNAs w/seed UUGGUCC),miR-138-5p (miRNAs w/seed GCUGGUG),miR-187-3p (miRNAs w/seed CGUGUCU),miR-192-5p (and other m…	25
Connective Tissue Disorders,Inflammatory Disease,Organismal Injury and Abnormalities,Respiratory Disease	idiopathic pulmonary fibrosis	Idiopathic pulmonary fibrosis	8.17e-06	0.000154					miR-125b-5p (and other miRNAs w/seed CCCUGAG),miR-138-5p (miRNAs w/seed GCUGGUG),miR-140-5p (and other miRNAs w/seed AGUGGUU),miR-184 (and other miRNAs w/seed GGACGGA),miR-26a-5p (and other miRNAs w/seed UCAAGUA),miR-30a-3p (and other miRNAs w/seed UUUCAGU),miR-30c-5p (and other miRNAs w/seed GUAAACA),miR-92a-3p (and other miRNAs w/seed AUUGCAC)	8
Inflammatory Disease,Inflammatory Response,Organismal Injury and Abnormalities,Respiratory Disease	severe asthma	Severe asthma	8.98e-06	0.000164					miR-100-5p (and other miRNAs w/seed ACCCGUA),miR-192-5p (and other miRNAs w/seed UGACCUA),miR-342-3p (miRNAs w/seed CUCACAC),miR-625-3p (miRNAs w/seed ACUAUAG),miR-96-5p (and other miRNAs w/seed UUGGCAC)	5
Hereditary Disorder,Neurological Disease,Organismal Injury and Abnormalities,Psychological Disorders,Skeletal and Muscular Disorders	Huntington disease	Early symptomatic stage Huntington disease	1.44e-05	0.000255					miR-135b-3p (and other miRNAs w/seed UGUAGGG),miR-140-5p (and other miRNAs w/seed AGUGGUU),miR-3928-5p (and other miRNAs w/seed GAAGCUC)	3
Developmental Disorder,Organismal Injury and Abnormalities,Skeletal and Muscular Disorders	congenital myopathy	Congenital myopathy	1.78e-05	0.000307					miR-100-5p (and other miRNAs w/seed ACCCGUA),miR-127-3p (miRNAs w/seed CGGAUCC),miR-30a-3p (and other miRNAs w/seed UUUCAGU),miR-376c-3p (and other miRNAs w/seed ACAUAGA),miR-501-3p (and other miRNAs w/seed AUGCACC),miR-505-5p (and other miRNAs w/seed GGAGCCA),miR-532-3p (miRNAs w/seed CUCCCAC)	7
Organismal Injury and Abnormalities	idiopathic fibrosis	Idiopathic fibrosis	2.14e-05	0.00036					miR-125b-5p (and other miRNAs w/seed CCCUGAG),miR-138-5p (miRNAs w/seed GCUGGUG),miR-140-5p (and other miRNAs w/seed AGUGGUU),miR-184 (and other miRNAs w/seed GGACGGA),miR-26a-5p (and other miRNAs w/seed UCAAGUA),miR-30a-3p (and other miRNAs w/seed UUUCAGU),miR-30c-5p (and other miRNAs w/seed GUAAACA),miR-376c-3p (and other miRNAs w/seed ACAUAGA),miR-92a-3p (and other miRNAs w/seed AUUGCAC)	9
Organismal Injury and Abnormalities	fibrosis	Fibrosis	3.29e-05	0.00054					miR-100-5p (and other miRNAs w/seed ACCCGUA),miR-125b-5p (and other miRNAs w/seed CCCUGAG),miR-130a-3p (and other miRNAs w/seed AGUGCAA),miR-133a-3p (and other miRNAs w/seed UUGGUCC),miR-138-5p (miRNAs w/seed GCUGGUG),miR-140-5p (and other miRNAs w/seed AGUGGUU),miR-184 (and other miRNAs w/seed GGACGGA),miR-192-5p (and other miRNAs w/seed UGACCUA),miR-1970 (and other miRNAs w/seed GUGUCAC),miR-26…	17
Infectious Diseases,Organismal Development	growth	Growth of Murine cytomegalovirus	5.8e-05	0.000926					miR-214-3p (and other miRNAs w/seed CAGCAGG),miR-30c-5p (and other miRNAs w/seed GUAAACA),miR-378a-3p (and other miRNAs w/seed CUGGACU)	3
Inflammatory Disease,Inflammatory Response,Neurological Disease,Organismal Injury and Abnormalities	encephalitis	Encephalitis	7.71e-05	0.0012					miR-133a-3p (and other miRNAs w/seed UUGGUCC),miR-140-5p (and other miRNAs w/seed AGUGGUU),miR-30c-5p (and other miRNAs w/seed GUAAACA),miR-3118 (and other miRNAs w/seed GUGACUG),miR-328-3p (and other miRNAs w/seed UGGCCCU),miR-33-5p (and other miRNAs w/seed UGCAUUG),miR-338-5p (miRNAs w/seed ACAAUAU),miR-344a-5p (and other miRNAs w/seed CAGGCUC),miR-381-3p (and other miRNAs w/seed AUACAAG),miR-4…	11
Gastrointestinal Disease,Inflammatory Disease,Inflammatory Response,Organismal Injury and Abnormalities	ulcerative colitis	Ulcerative colitis	8.1e-05	0.00123					miR-138-5p (miRNAs w/seed GCUGGUG),miR-146b-3p (miRNAs w/seed CCCUGUG),miR-150-3p (miRNAs w/seed UGGUACA),miR-27a-5p (miRNAs w/seed GGGCUUA),miR-362-5p (and other miRNAs w/seed AUCCUUG),miR-450b-3p (and other miRNAs w/seed UGGGAUC),miR-501-5p (miRNAs w/seed AUCCUUU),miR-550a-3p (and other miRNAs w/seed GUCUUAC)	8
Immunological Disease,Inflammatory Disease,Inflammatory Response,Neurological Disease,Organismal Injury and Abnormalities	experimental autoimmune encephalomyelitis	Experimental autoimmune encephalomyelitis	0.000124	0.00184					miR-133a-3p (and other miRNAs w/seed UUGGUCC),miR-140-5p (and other miRNAs w/seed AGUGGUU),miR-30c-5p (and other miRNAs w/seed GUAAACA),miR-3118 (and other miRNAs w/seed GUGACUG),miR-328-3p (and other miRNAs w/seed UGGCCCU),miR-33-5p (and other miRNAs w/seed UGCAUUG),miR-344a-5p (and other miRNAs w/seed CAGGCUC),miR-381-3p (and other miRNAs w/seed AUACAAG),miR-409-3p (miRNAs w/seed AAUGUUG),miR-9…	10
Cancer,Endocrine System Disorders,Organismal Injury and Abnormalities	papillary thyroid cancer	Papillary thyroid carcinoma	0.000145	0.00209					miR-130a-3p (and other miRNAs w/seed AGUGCAA),miR-146a-3p (and other miRNAs w/seed CUCUGAA),miR-30c-5p (and other miRNAs w/seed GUAAACA),miR-345-5p (miRNAs w/seed CUGACUC),miR-34a-5p (and other miRNAs w/seed GGCAGUG),miR-381-3p (and other miRNAs w/seed AUACAAG),miR-574-5p (miRNAs w/seed GAGUGUG)	7
Digestive System Development and Function,Gastrointestinal Disease,Hepatic System Development and Function,Hepatic System Disease,Infectious Diseases,Inflammatory Disease,Inflammatory Response,Organ Development,Organismal Injury and Abnormalities	chronic hepatitis B	Chronic hepatitis B	0.000147	0.00209					miR-100-5p (and other miRNAs w/seed ACCCGUA),miR-130a-3p (and other miRNAs w/seed AGUGCAA),miR-1970 (and other miRNAs w/seed GUGUCAC),miR-671-5p (miRNAs w/seed GGAAGCC)	4
Neurological Disease,Organismal Injury and Abnormalities	epilepsy	Epilepsy	0.00017	0.00236					miR-100-5p (and other miRNAs w/seed ACCCGUA),miR-10a-5p (and other miRNAs w/seed ACCCUGU),miR-125b-5p (and other miRNAs w/seed CCCUGAG),miR-127-3p (miRNAs w/seed CGGAUCC),miR-132-3p (and other miRNAs w/seed AACAGUC),miR-1839-5p (and other miRNAs w/seed AGGUAGA),miR-1843a-5p (and other miRNAs w/seed AUGGAGG),miR-30c-5p (and other miRNAs w/seed GUAAACA),miR-33-5p (and other miRNAs w/seed UGCAUUG),m…	11
Cell Cycle	G2/M phase	Arrest in G2/M phase of pancreatic cancer cell lines	0.0002	0.00272					miR-132-3p (and other miRNAs w/seed AACAGUC),miR-34a-5p (and other miRNAs w/seed GGCAGUG)	2
Metabolic Disease,Neurological Disease,Organismal Injury and Abnormalities,Psychological Disorders	Alzheimer disease	Alzheimer disease	0.00022	0.00293					miR-100-5p (and other miRNAs w/seed ACCCGUA),miR-125b-5p (and other miRNAs w/seed CCCUGAG),miR-132-3p (and other miRNAs w/seed AACAGUC),miR-188-3p (miRNAs w/seed UCCCACA),miR-26a-5p (and other miRNAs w/seed UCAAGUA),miR-30c-5p (and other miRNAs w/seed GUAAACA),miR-325-5p (and other miRNAs w/seed CUAGUAG),miR-338-5p (miRNAs w/seed ACAAUAU),miR-34a-5p (and other miRNAs w/seed GGCAGUG),miR-378a-3p (…	13
Cardiovascular Disease,Organismal Injury and Abnormalities,Skeletal and Muscular Disorders	intrinsic cardiomyopathy	Intrinsic cardiomyopathy	0.000293	0.00382					miR-1-3p (and other miRNAs w/seed GGAAUGU),miR-1180-3p (miRNAs w/seed UUCCGGC),miR-1262 (and other miRNAs w/seed UGGGUGA),miR-133a-3p (and other miRNAs w/seed UUGGUCC),miR-214-3p (and other miRNAs w/seed CAGCAGG),miR-26a-5p (and other miRNAs w/seed UCAAGUA),miR-3064-5p (and other miRNAs w/seed CUGGCUG),miR-30c-5p (and other miRNAs w/seed GUAAACA),miR-642a-3p (and other miRNAs w/seed GACACAU),miR-…	10
Cardiovascular Disease	arrhythmogenesis	Arrhythmogenesis	0.000299	0.00382					miR-1-3p (and other miRNAs w/seed GGAAUGU),miR-133a-3p (and other miRNAs w/seed UUGGUCC)	2
Cancer,Organismal Injury and Abnormalities	primary tumor	Primary tumor	0.000425	0.00526					miR-1-3p (and other miRNAs w/seed GGAAUGU),miR-100-5p (and other miRNAs w/seed ACCCGUA),miR-10a-5p (and other miRNAs w/seed ACCCUGU),miR-125b-5p (and other miRNAs w/seed CCCUGAG),miR-130a-3p (and other miRNAs w/seed AGUGCAA),miR-132-3p (and other miRNAs w/seed AACAGUC),miR-196a-5p (and other miRNAs w/seed AGGUAGU),miR-30c-5p (and other miRNAs w/seed GUAAACA),miR-9-5p (and other miRNAs w/seed CUUU…	10
Developmental Disorder,Hereditary Disorder,Organismal Injury and Abnormalities,Skeletal and Muscular Disorders	dystrophy	Dystrophy of muscle	0.000428	0.00526					miR-1-3p (and other miRNAs w/seed GGAAUGU),miR-100-5p (and other miRNAs w/seed ACCCGUA),miR-127-3p (miRNAs w/seed CGGAUCC),miR-30a-3p (and other miRNAs w/seed UUUCAGU),miR-376c-3p (and other miRNAs w/seed ACAUAGA),miR-501-3p (and other miRNAs w/seed AUGCACC),miR-505-5p (and other miRNAs w/seed GGAGCCA),miR-532-3p (miRNAs w/seed CUCCCAC)	8
Cancer,Organismal Injury and Abnormalities	solid tumor	Primary solid tumor	0.000459	0.00554					miR-1-3p (and other miRNAs w/seed GGAAUGU),miR-100-5p (and other miRNAs w/seed ACCCGUA),miR-10a-5p (and other miRNAs w/seed ACCCUGU),miR-125b-5p (and other miRNAs w/seed CCCUGAG),miR-130a-3p (and other miRNAs w/seed AGUGCAA),miR-132-3p (and other miRNAs w/seed AACAGUC),miR-196a-5p (and other miRNAs w/seed AGGUAGU),miR-30c-5p (and other miRNAs w/seed GUAAACA),miR-9-5p (and other miRNAs w/seed CUUU…	10
Cancer,Organismal Injury and Abnormalities	metastatic solid tumor	Metastatic solid tumor	0.000736	0.00871		1		0.733	miR-1-3p (and other miRNAs w/seed GGAAUGU),miR-122-5p (miRNAs w/seed GGAGUGU),miR-125b-5p (and other miRNAs w/seed CCCUGAG),miR-130a-3p (and other miRNAs w/seed AGUGCAA),miR-133a-3p (and other miRNAs w/seed UUGGUCC),miR-138-5p (miRNAs w/seed GCUGGUG),miR-196a-5p (and other miRNAs w/seed AGGUAGU),miR-26a-5p (and other miRNAs w/seed UCAAGUA),miR-34a-5p (and other miRNAs w/seed GGCAGUG),miR-550a-3p …	13
Cardiovascular Disease,Cardiovascular System Development and Function,Organ Morphology,Organismal Development,Organismal Injury and Abnormalities,Skeletal and Muscular Disorders	dilated cardiomyopathy	Dilated cardiomyopathy	0.00137	0.016					miR-1-3p (and other miRNAs w/seed GGAAUGU),miR-1180-3p (miRNAs w/seed UUCCGGC),miR-1262 (and other miRNAs w/seed UGGGUGA),miR-26a-5p (and other miRNAs w/seed UCAAGUA),miR-3064-5p (and other miRNAs w/seed CUGGCUG),miR-30c-5p (and other miRNAs w/seed GUAAACA),miR-642a-3p (and other miRNAs w/seed GACACAU),miR-6894-5p (and other miRNAs w/seed GGAGGAU)	8
Cellular Development,Cellular Growth and Proliferation,Hematological System Development and Function,Hematopoiesis,Lymphoid Tissue Structure and Development,Tissue Development	differentiation	Differentiation of granulocyte progenitors	0.00177	0.0199					miR-125b-5p (and other miRNAs w/seed CCCUGAG),miR-196a-5p (and other miRNAs w/seed AGGUAGU)	2
Infectious Diseases,Organismal Development	growth	Growth of Murine herpesvirus 4	0.00177	0.0199					miR-214-3p (and other miRNAs w/seed CAGCAGG),miR-30c-5p (and other miRNAs w/seed GUAAACA)	2
Cancer,Organismal Injury and Abnormalities	metastasis	Metastasis	0.00181	0.0199		-1.373		-1.78	miR-1-3p (and other miRNAs w/seed GGAAUGU),miR-122-5p (miRNAs w/seed GGAGUGU),miR-125b-5p (and other miRNAs w/seed CCCUGAG),miR-130a-3p (and other miRNAs w/seed AGUGCAA),miR-133a-3p (and other miRNAs w/seed UUGGUCC),miR-138-5p (miRNAs w/seed GCUGGUG),miR-193a-5p (miRNAs w/seed GGGUCUU),miR-196a-5p (and other miRNAs w/seed AGGUAGU),miR-26a-5p (and other miRNAs w/seed UCAAGUA),miR-34a-5p (and other…	17
Cancer,Organismal Injury and Abnormalities	malignant mesothelioma	Malignant mesothelioma	0.00222	0.0236					let-7e-3p (miRNAs w/seed UAUACGG),miR-345-5p (miRNAs w/seed CUGACUC),miR-34a-3p (miRNAs w/seed AAUCAGC),miR-9-5p (and other miRNAs w/seed CUUUGGU)	4
Cancer,Gastrointestinal Disease,Organismal Injury and Abnormalities	colorectal cancer	Stage I colorectal cancer	0.00232	0.0236					miR-125b-5p (and other miRNAs w/seed CCCUGAG),miR-34a-5p (and other miRNAs w/seed GGCAGUG)	2
Infectious Diseases,Organismal Development	growth	Growth of human herpesvirus 1	0.00232	0.0236					miR-214-3p (and other miRNAs w/seed CAGCAGG),miR-30c-5p (and other miRNAs w/seed GUAAACA)	2
Cellular Development	maturation	Maturation of chondrocyte cell lines	0.00232	0.0236					miR-30c-5p (and other miRNAs w/seed GUAAACA),miR-34a-5p (and other miRNAs w/seed GGCAGUG)	2
Free Radical Scavenging,Molecular Transport,Small Molecule Biochemistry	release	Release of hydrogen peroxide	0.00232	0.0236					miR-100-5p (and other miRNAs w/seed ACCCGUA),miR-92a-3p (and other miRNAs w/seed AUUGCAC)	2
Cellular Growth and Proliferation	proliferation	Proliferation of eye cell lines	0.00242	0.0239					miR-191-3p (miRNAs w/seed CUGCGCU),miR-874-3p (miRNAs w/seed UGCCCUG),miR-92a-3p (and other miRNAs w/seed AUUGCAC)	3
Organismal Injury and Abnormalities,Reproductive System Disease	benign pelvic disease	Benign pelvic disease	0.00243	0.0239					miR-1-3p (and other miRNAs w/seed GGAAUGU),miR-100-5p (and other miRNAs w/seed ACCCGUA),miR-125b-5p (and other miRNAs w/seed CCCUGAG),miR-132-3p (and other miRNAs w/seed AACAGUC),miR-196a-5p (and other miRNAs w/seed AGGUAGU),miR-30a-3p (and other miRNAs w/seed UUUCAGU),miR-30c-5p (and other miRNAs w/seed GUAAACA),miR-34a-5p (and other miRNAs w/seed GGCAGUG),miR-34c-3p (and other miRNAs w/seed AUC…	11
Cancer,Gastrointestinal Disease,Organismal Injury and Abnormalities	colorectal cancer	Stage I-III colorectal cancer	0.00291	0.0282					miR-125b-5p (and other miRNAs w/seed CCCUGAG),miR-34a-5p (and other miRNAs w/seed GGCAGUG),miR-92a-3p (and other miRNAs w/seed AUUGCAC)	3
Psychological Disorders	psychological disorder	Severe psychological disorder	0.003	0.0286					miR-132-3p (and other miRNAs w/seed AACAGUC),miR-133a-3p (and other miRNAs w/seed UUGGUCC),miR-188-3p (miRNAs w/seed UCCCACA),miR-26a-5p (and other miRNAs w/seed UCAAGUA),miR-30c-5p (and other miRNAs w/seed GUAAACA),miR-3118 (and other miRNAs w/seed GUGACUG),miR-328-3p (and other miRNAs w/seed UGGCCCU),miR-34a-5p (and other miRNAs w/seed GGCAGUG),miR-382-5p (miRNAs w/seed AAGUUGU),miR-454-5p (miR…	12
Gastrointestinal Disease,Hepatic System Disease,Organismal Injury and Abnormalities	fibrosis	Fibrosis of liver	0.00334	0.0313					miR-100-5p (and other miRNAs w/seed ACCCGUA),miR-130a-3p (and other miRNAs w/seed AGUGCAA),miR-133a-3p (and other miRNAs w/seed UUGGUCC),miR-1970 (and other miRNAs w/seed GUGUCAC),miR-30c-5p (and other miRNAs w/seed GUAAACA),miR-455-3p (miRNAs w/seed CAGUCCA),miR-671-5p (miRNAs w/seed GGAAGCC)	7
Organismal Injury and Abnormalities,Renal and Urological Disease	cystic kidney disease	Cystic kidney disease	0.00338	0.0313					miR-100-5p (and other miRNAs w/seed ACCCGUA),miR-192-5p (and other miRNAs w/seed UGACCUA),miR-196a-5p (and other miRNAs w/seed AGGUAGU),miR-216a-5p (miRNAs w/seed AAUCUCA),miR-30c-5p (and other miRNAs w/seed GUAAACA),miR-34a-5p (and other miRNAs w/seed GGCAGUG),miR-96-5p (and other miRNAs w/seed UUGGCAC)	7
Organismal Injury and Abnormalities,Reproductive System Disease	endometriosis	Endometriosis	0.00345	0.0315					miR-1-3p (and other miRNAs w/seed GGAAUGU),miR-100-5p (and other miRNAs w/seed ACCCGUA),miR-125b-5p (and other miRNAs w/seed CCCUGAG),miR-196a-5p (and other miRNAs w/seed AGGUAGU),miR-30a-3p (and other miRNAs w/seed UUUCAGU),miR-34a-5p (and other miRNAs w/seed GGCAGUG),miR-34c-3p (and other miRNAs w/seed AUCACUA),miR-9-5p (and other miRNAs w/seed CUUUGGU)	8
Neurological Disease,Psychological Disorders	schizophrenia	Schizophrenia	0.00361	0.0325					miR-132-3p (and other miRNAs w/seed AACAGUC),miR-188-3p (miRNAs w/seed UCCCACA),miR-26a-5p (and other miRNAs w/seed UCAAGUA),miR-30c-5p (and other miRNAs w/seed GUAAACA),miR-3118 (and other miRNAs w/seed GUGACUG),miR-328-3p (and other miRNAs w/seed UGGCCCU),miR-34a-5p (and other miRNAs w/seed GGCAGUG),miR-382-5p (miRNAs w/seed AAGUUGU),miR-92a-3p (and other miRNAs w/seed AUUGCAC)	9
Neurological Disease	epilepsy or neurodevelopmental disorder	Epilepsy or neurodevelopmental disorder	0.00407	0.0361					miR-100-5p (and other miRNAs w/seed ACCCGUA),miR-10a-5p (and other miRNAs w/seed ACCCUGU),miR-125b-5p (and other miRNAs w/seed CCCUGAG),miR-127-3p (miRNAs w/seed CGGAUCC),miR-130a-3p (and other miRNAs w/seed AGUGCAA),miR-132-3p (and other miRNAs w/seed AACAGUC),miR-1839-5p (and other miRNAs w/seed AGGUAGA),miR-1843a-5p (and other miRNAs w/seed AUGGAGG),miR-30c-5p (and other miRNAs w/seed GUAAACA)…	12
Cellular Movement	migration	Migration of tumor cell lines	0.00488	0.0427		-0.997		-1.673	miR-10a-5p (and other miRNAs w/seed ACCCUGU),miR-122-5p (miRNAs w/seed GGAGUGU),miR-125b-5p (and other miRNAs w/seed CCCUGAG),miR-130a-3p (and other miRNAs w/seed AGUGCAA),miR-139-5p (miRNAs w/seed CUACAGU),miR-193a-5p (miRNAs w/seed GGGUCUU),miR-212-5p (miRNAs w/seed CCUUGGC),miR-214-3p (and other miRNAs w/seed CAGCAGG),miR-26a-5p (and other miRNAs w/seed UCAAGUA),miR-34a-5p (and other miRNAs w/…	15
Developmental Disorder,Hereditary Disorder,Organismal Injury and Abnormalities,Renal and Urological Disease	polycystic kidney disease	Polycystic Kidney Disease	0.00507	0.0438					miR-100-5p (and other miRNAs w/seed ACCCGUA),miR-196a-5p (and other miRNAs w/seed AGGUAGU),miR-216a-5p (miRNAs w/seed AAUCUCA),miR-30c-5p (and other miRNAs w/seed GUAAACA),miR-34a-5p (and other miRNAs w/seed GGCAGUG),miR-96-5p (and other miRNAs w/seed UUGGCAC)	6
Hereditary Disorder,Organismal Injury and Abnormalities,Renal and Urological Disease	hereditary kidney disease	Hereditary kidney disease	0.00535	0.0456					miR-100-5p (and other miRNAs w/seed ACCCGUA),miR-196a-5p (and other miRNAs w/seed AGGUAGU),miR-216a-5p (miRNAs w/seed AAUCUCA),miR-30c-5p (and other miRNAs w/seed GUAAACA),miR-34a-5p (and other miRNAs w/seed GGCAGUG),miR-362-5p (and other miRNAs w/seed AUCCUUG),miR-532-3p (miRNAs w/seed CUCCCAC),miR-96-5p (and other miRNAs w/seed UUGGCAC)	8
Developmental Disorder,Hereditary Disorder,Metabolic Disease,Organismal Injury and Abnormalities,Renal and Urological Disease	Dent disease	Dent disease	0.00611	0.0513					miR-362-5p (and other miRNAs w/seed AUCCUUG),miR-532-3p (miRNAs w/seed CUCCCAC)	2
Cellular Movement	invasion	Invasion of tumor cell lines	0.00759	0.0625	Decreased	-2.163		-2.808	miR-10a-5p (and other miRNAs w/seed ACCCUGU),miR-122-5p (miRNAs w/seed GGAGUGU),miR-125b-5p (and other miRNAs w/seed CCCUGAG),miR-138-5p (miRNAs w/seed GCUGGUG),miR-139-5p (miRNAs w/seed CUACAGU),miR-193a-5p (miRNAs w/seed GGGUCUU),miR-212-5p (miRNAs w/seed CCUUGGC),miR-214-3p (and other miRNAs w/seed CAGCAGG),miR-26a-5p (and other miRNAs w/seed UCAAGUA),miR-342-3p (miRNAs w/seed CUCACAC),miR-34a…	14
Cancer,Organismal Injury and Abnormalities	neoplasia	Neoplasia of carcinoma cell lines	0.00773	0.0625	Decreased	-2		-2.293	miR-125b-5p (and other miRNAs w/seed CCCUGAG),miR-193a-5p (miRNAs w/seed GGGUCUU),miR-532-3p (miRNAs w/seed CUCCCAC),miR-671-5p (miRNAs w/seed GGAAGCC)	4
Cardiovascular Disease,Cardiovascular System Development and Function,Organ Morphology,Organismal Development,Organismal Injury and Abnormalities	enlargement	Enlargement of heart	0.00804	0.0625					miR-1-3p (and other miRNAs w/seed GGAAUGU),miR-1180-3p (miRNAs w/seed UUCCGGC),miR-1262 (and other miRNAs w/seed UGGGUGA),miR-133a-3p (and other miRNAs w/seed UUGGUCC),miR-214-3p (and other miRNAs w/seed CAGCAGG),miR-26a-5p (and other miRNAs w/seed UCAAGUA),miR-3064-5p (and other miRNAs w/seed CUGGCUG),miR-30c-5p (and other miRNAs w/seed GUAAACA),miR-642a-3p (and other miRNAs w/seed GACACAU),miR-…	10
Infectious Diseases	cecal ligation and puncture-induced sepsis	Cecal ligation and puncture-induced sepsis	0.009	0.0625					miR-130a-3p (and other miRNAs w/seed AGUGCAA)	1
Cell Death and Survival,Cell-To-Cell Signaling and Interaction,Cellular Assembly and Organization,Cellular Development,Cellular Function and Maintenance,Cellular Growth and Proliferation,Nervous System Development and Function,Tissue Development,Tissue Morphology	regeneration	Regeneration of neuromuscular synapse	0.009	0.0625					miR-1-3p (and other miRNAs w/seed GGAAUGU)	1
Cancer,Cellular Response to Therapeutics,Organismal Injury and Abnormalities	chemosensitivity	Chemosensitivity of squamous cell carcinoma cell lines	0.009	0.0625					miR-193a-5p (miRNAs w/seed GGGUCUU)	1
Cell Morphology,Cellular Function and Maintenance	autophagy	Autophagy of bone marrow cell lines	0.009	0.0625					miR-125b-5p (and other miRNAs w/seed CCCUGAG)	1
Cancer,Cell Death and Survival,Organismal Injury and Abnormalities,Tumor Morphology	cell viability	Cell viability of squamous carcinoma cells	0.009	0.0625					miR-193a-5p (miRNAs w/seed GGGUCUU)	1
Cell Cycle,Cellular Development,Respiratory System Development and Function	replicative senescence	Delay in initiation of replicative senescence of lung cell lines	0.009	0.0625					miR-34a-5p (and other miRNAs w/seed GGCAGUG)	1
Cell-To-Cell Signaling and Interaction,Cellular Growth and Proliferation,Hematological System Development and Function	induction	Induction of follicular T helper precursor cells	0.009	0.0625					miR-92a-3p (and other miRNAs w/seed AUUGCAC)	1
Cell Morphology,Hematological System Development and Function,Inflammatory Response	M1 polarization	M1 polarization of M2 macrophages	0.009	0.0625					miR-125b-5p (and other miRNAs w/seed CCCUGAG)	1
Cell-To-Cell Signaling and Interaction,Cellular Assembly and Organization,Cellular Function and Maintenance,Nervous System Development and Function,Tissue Development	function	Function of GABAergic synapse	0.009	0.0625					miR-501-3p (and other miRNAs w/seed AUGCACC)	1
Cancer,Cell-To-Cell Signaling and Interaction,Organismal Injury and Abnormalities	detachment	Detachment of cancer cells	0.009	0.0625					miR-196a-5p (and other miRNAs w/seed AGGUAGU)	1
Cancer,Cell-To-Cell Signaling and Interaction,Organismal Injury and Abnormalities	response	Response of mammary tumor cells	0.009	0.0625					miR-330-5p (and other miRNAs w/seed CUCUGGG)	1
Cancer,Cell-To-Cell Signaling and Interaction,Organismal Injury and Abnormalities,Tumor Morphology	sensitization	Sensitization of adenocarcinoma cells	0.009	0.0625					miR-133a-3p (and other miRNAs w/seed UUGGUCC)	1
Auditory Disease,Hereditary Disorder,Neurological Disease,Organismal Injury and Abnormalities	nonsyndromic autosomal dominant 50 deafness	Nonsyndromic autosomal dominant 50 deafness	0.009	0.0625					miR-96-5p (and other miRNAs w/seed UUGGCAC)	1
Cancer,Gastrointestinal Disease,Organismal Injury and Abnormalities	colorectal cancer	Stage II colorectal cancer	0.00916	0.0629					miR-34a-5p (and other miRNAs w/seed GGCAGUG),miR-92a-3p (and other miRNAs w/seed AUUGCAC)	2
Cancer,Hematological Disease,Immunological Disease,Organismal Injury and Abnormalities	Richter syndrome	Richter syndrome	0.0109	0.074					miR-125b-5p (and other miRNAs w/seed CCCUGAG),miR-34a-5p (and other miRNAs w/seed GGCAGUG)	2
Metabolic Disease,Neurological Disease,Organismal Injury and Abnormalities,Psychological Disorders	nonfamilial Alzheimer disease	Nonfamilial Alzheimer disease	0.0115	0.0773					miR-34a-5p (and other miRNAs w/seed GGCAGUG),miR-92a-3p (and other miRNAs w/seed AUUGCAC)	2
Cellular Development,Hematological System Development and Function	transition	Transition of pre-pro-B lymphocytes	0.0135	0.082					miR-132-3p (and other miRNAs w/seed AACAGUC)	1
Cell-To-Cell Signaling and Interaction,Cellular Function and Maintenance,Hematological System Development and Function,Inflammatory Response	phagocytic capacity	Phagocytic capacity of GM-CSF-dependent bone marrow-derived macrophage	0.0135	0.082					miR-125b-5p (and other miRNAs w/seed CCCUGAG)	1
Cell-To-Cell Signaling and Interaction,Hematological System Development and Function,Immune Cell Trafficking,Inflammatory Response	activation	Activation of GM-CSF-dependent bone marrow-derived macrophage	0.0135	0.082					miR-125b-5p (and other miRNAs w/seed CCCUGAG)	1
Cardiovascular System Development and Function,Organ Morphology,Skeletal and Muscular System Development and Function,Tissue Morphology	quantity	Quantity of ventricular myocytes	0.0135	0.082					miR-1-3p (and other miRNAs w/seed GGAAUGU)	1
Cancer,Organismal Injury and Abnormalities	vasculogenic mimicry	Vasculogenic mimicry	0.0135	0.082					miR-26a-5p (and other miRNAs w/seed UCAAGUA)	1
Cellular Development,Cellular Growth and Proliferation,Hematological System Development and Function,Hematopoiesis,Lymphoid Tissue Structure and Development,Tissue Development	differentiation	Differentiation of monocytic myeloid derived suppressor cells	0.0135	0.082					miR-9-5p (and other miRNAs w/seed CUUUGGU)	1
Cancer	sphere formation	Sphere formation of duct cancer cell lines	0.0135	0.082					miR-125b-5p (and other miRNAs w/seed CCCUGAG)	1
Cancer,Organismal Injury and Abnormalities	tumorigenesis	Tumorigenesis of cholangiocarcinoma cell lines	0.0135	0.082					miR-125b-5p (and other miRNAs w/seed CCCUGAG)	1
Cancer	sphere formation	Sphere formation of cholangiocarcinoma cell lines	0.0135	0.082					miR-125b-5p (and other miRNAs w/seed CCCUGAG)	1
Cellular Development,Cellular Growth and Proliferation,Hematological System Development and Function,Hematopoiesis,Lymphoid Tissue Structure and Development,Tissue Development	differentiation	Differentiation of polymorphonuclear granulocytic MDSC cells	0.0135	0.082					miR-9-5p (and other miRNAs w/seed CUUUGGU)	1
Connective Tissue Disorders,Inflammatory Disease,Organismal Injury and Abnormalities,Respiratory Disease	idiopathic pulmonary fibrosis	Rapidly progressive idiopathic pulmonary fibrosis	0.0141	0.0844					miR-125b-5p (and other miRNAs w/seed CCCUGAG),miR-140-5p (and other miRNAs w/seed AGUGGUU)	2
Endocrine System Disorders,Gastrointestinal Disease,Metabolic Disease,Organismal Injury and Abnormalities	diabetes mellitus	Diabetes mellitus	0.0141	0.0844					miR-1-3p (and other miRNAs w/seed GGAAUGU),miR-100-5p (and other miRNAs w/seed ACCCGUA),miR-122-5p (miRNAs w/seed GGAGUGU),miR-125b-5p (and other miRNAs w/seed CCCUGAG),miR-127-3p (miRNAs w/seed CGGAUCC),miR-130a-3p (and other miRNAs w/seed AGUGCAA),miR-132-3p (and other miRNAs w/seed AACAGUC),miR-133a-3p (and other miRNAs w/seed UUGGUCC),miR-184 (and other miRNAs w/seed GGACGGA),miR-190a-5p (and…	18
Cancer,Organismal Injury and Abnormalities	metastasis	Metastasis of carcinoma cell lines	0.0153	0.0906					miR-193a-5p (miRNAs w/seed GGGUCUU),miR-532-3p (miRNAs w/seed CUCCCAC),miR-671-5p (miRNAs w/seed GGAAGCC)	3
Cellular Development,Cellular Growth and Proliferation	cell proliferation	Cell proliferation of carcinoma cell lines	0.016	0.0941		-1.289		-1.687	miR-100-5p (and other miRNAs w/seed ACCCGUA),miR-139-5p (miRNAs w/seed CUACAGU),miR-212-5p (miRNAs w/seed CCUUGGC),miR-26a-5p (and other miRNAs w/seed UCAAGUA),miR-30a-3p (and other miRNAs w/seed UUUCAGU),miR-30c-1-3p (and other miRNAs w/seed UGGGAGA),miR-34a-5p (and other miRNAs w/seed GGCAGUG),miR-378a-3p (and other miRNAs w/seed CUGGACU),miR-574-5p (miRNAs w/seed GAGUGUG)	9
Connective Tissue Disorders,Hematological Disease,Immunological Disease,Organismal Injury and Abnormalities	immune thrombocytopenia	Immune thrombocytopenia	0.0164	0.0952					miR-125b-5p (and other miRNAs w/seed CCCUGAG),miR-150-3p (miRNAs w/seed UGGUACA),miR-671-5p (miRNAs w/seed GGAAGCC)	3
Cancer	atypical hyperplasia	Atypical hyperplasia	0.0176	0.0979					miR-30c-5p (and other miRNAs w/seed GUAAACA),miR-671-5p (miRNAs w/seed GGAAGCC)	2
Cellular Movement	invasion	Invasion of cells	0.0178	0.0979	Decreased	-2.251		-2.852	miR-10a-5p (and other miRNAs w/seed ACCCUGU),miR-122-5p (miRNAs w/seed GGAGUGU),miR-125b-5p (and other miRNAs w/seed CCCUGAG),miR-138-5p (miRNAs w/seed GCUGGUG),miR-139-5p (miRNAs w/seed CUACAGU),miR-193a-5p (miRNAs w/seed GGGUCUU),miR-196a-5p (and other miRNAs w/seed AGGUAGU),miR-212-5p (miRNAs w/seed CCUUGGC),miR-214-3p (and other miRNAs w/seed CAGCAGG),miR-26a-5p (and other miRNAs w/seed UCAAG…	15
Cellular Development	maturation	Maturation of fibroblast cell lines	0.0179	0.0979					miR-30c-5p (and other miRNAs w/seed GUAAACA)	1
Cell Cycle,Nervous System Development and Function	cell cycle progression	Entry into cell cycle progression of cortical neurons	0.0179	0.0979					miR-26a-5p (and other miRNAs w/seed UCAAGUA)	1
Cell-To-Cell Signaling and Interaction,Cellular Growth and Proliferation,Hematological System Development and Function	suppressive capacity	Suppressive capacity of monocytic myeloid derived suppressor cells	0.0179	0.0979					miR-9-5p (and other miRNAs w/seed CUUUGGU)	1
Cell Morphology,Cellular Assembly and Organization,Cellular Development,Cellular Function and Maintenance,Cellular Growth and Proliferation,Embryonic Development,Nervous System Development and Function,Organismal Development,Tissue Development,Tissue Morphology	volume	Volume of dendritic spines	0.0179	0.0979					miR-138-5p (miRNAs w/seed GCUGGUG)	1
Infectious Diseases,Organismal Development	growth	Growth of Human cytomegalovirus	0.0179	0.0979					miR-214-3p (and other miRNAs w/seed CAGCAGG)	1
Cancer,Organismal Injury and Abnormalities,Reproductive System Disease	metastasis	Metastasis of mammary tumor cells	0.0183	0.0993					miR-138-5p (miRNAs w/seed GCUGGUG),miR-196a-5p (and other miRNAs w/seed AGGUAGU)	2
Cancer,Organismal Injury and Abnormalities	metastasis	Metastasis of cells	0.0191	0.102		-0.478		-0.897	miR-133a-3p (and other miRNAs w/seed UUGGUCC),miR-138-5p (miRNAs w/seed GCUGGUG),miR-193a-5p (miRNAs w/seed GGGUCUU),miR-196a-5p (and other miRNAs w/seed AGGUAGU),miR-532-3p (miRNAs w/seed CUCCCAC),miR-671-5p (miRNAs w/seed GGAAGCC),miR-9-5p (and other miRNAs w/seed CUUUGGU)	7
Cardiovascular Disease,Connective Tissue Disorders,Dermatological Diseases and Conditions,Immunological Disease,Inflammatory Disease,Organismal Injury and Abnormalities,Skeletal and Muscular Disorders	systemic sclerosis	Systemic sclerosis	0.0191	0.102					miR-1-3p (and other miRNAs w/seed GGAAUGU),miR-125b-5p (and other miRNAs w/seed CCCUGAG),miR-196a-5p (and other miRNAs w/seed AGGUAGU)	3
Cell Morphology,Organ Morphology,Skeletal and Muscular System Development and Function,Tissue Morphology	area	Area of muscle cells	0.0199	0.105					miR-125b-5p (and other miRNAs w/seed CCCUGAG),miR-184 (and other miRNAs w/seed GGACGGA)	2
Cancer,Organismal Injury and Abnormalities	neoplasia	Neoplasia of tumor cell lines	0.0203	0.106		-1.463		-1.939	miR-122-5p (miRNAs w/seed GGAGUGU),miR-125b-5p (and other miRNAs w/seed CCCUGAG),miR-133a-3p (and other miRNAs w/seed UUGGUCC),miR-193a-5p (miRNAs w/seed GGGUCUU),miR-26a-5p (and other miRNAs w/seed UCAAGUA),miR-532-3p (miRNAs w/seed CUCCCAC),miR-671-5p (miRNAs w/seed GGAAGCC),miR-9-5p (and other miRNAs w/seed CUUUGGU)	8
Inflammatory Disease,Neurological Disease,Skeletal and Muscular Disorders	multiple sclerosis	Multiple Sclerosis	0.0215	0.11					miR-125b-5p (and other miRNAs w/seed CCCUGAG),miR-330-5p (and other miRNAs w/seed CUCUGGG),miR-34a-5p (and other miRNAs w/seed GGCAGUG),miR-92a-3p (and other miRNAs w/seed AUUGCAC),miR-96-5p (and other miRNAs w/seed UUGGCAC)	5
Cancer,Gastrointestinal Disease,Organismal Injury and Abnormalities	esophageal squamous cell cancer	Esophageal squamous cell carcinoma	0.022	0.11					miR-1-3p (and other miRNAs w/seed GGAAUGU),miR-100-5p (and other miRNAs w/seed ACCCGUA),miR-133a-3p (and other miRNAs w/seed UUGGUCC),miR-139-5p (miRNAs w/seed CUACAGU),miR-330-5p (and other miRNAs w/seed CUCUGGG)	5
Cancer,Neurological Disease,Organismal Injury and Abnormalities	anaplastic astrocytoma	Anaplastic astrocytoma	0.0223	0.11					miR-10a-5p (and other miRNAs w/seed ACCCUGU),miR-26a-5p (and other miRNAs w/seed UCAAGUA)	2
Cellular Development,Cellular Growth and Proliferation	colony formation	Colony formation of cholangiocarcinoma cell lines	0.0224	0.11					miR-26a-5p (and other miRNAs w/seed UCAAGUA)	1
Cell Death and Survival,Hematological System Development and Function	survival	Survival of myeloid progenitor cells	0.0224	0.11					miR-328-3p (and other miRNAs w/seed UGGCCCU)	1
Cell-To-Cell Signaling and Interaction,Cellular Function and Maintenance,Hematological System Development and Function,Inflammatory Response	efferocytosis	Efferocytosis by alveolar macrophages	0.0224	0.11					miR-34a-5p (and other miRNAs w/seed GGCAGUG)	1
Cancer,Organismal Injury and Abnormalities,Skeletal and Muscular Disorders	rhabdomyosarcoma	Primary rhabdomyosarcoma	0.0224	0.11					miR-1-3p (and other miRNAs w/seed GGAAUGU)	1
Cellular Development,Cellular Growth and Proliferation,Hematological System Development and Function,Hematopoiesis,Lymphoid Tissue Structure and Development,Tissue Development	granulopoiesis	Granulopoiesis of granulocyte progenitors	0.0224	0.11					miR-196a-5p (and other miRNAs w/seed AGGUAGU)	1
Cellular Movement	migration	Migration of bladder cancer cell lines	0.0248	0.121					miR-139-5p (miRNAs w/seed CUACAGU),miR-381-3p (and other miRNAs w/seed AUACAAG)	2
Cancer,Cellular Response to Therapeutics,Organismal Injury and Abnormalities	chemosensitivity	Chemosensitivity of cancer cells	0.0268	0.125					miR-196a-5p (and other miRNAs w/seed AGGUAGU)	1
Small Molecule Biochemistry	efficacy	Efficacy of methotrexate	0.0268	0.125					miR-192-5p (and other miRNAs w/seed UGACCUA)	1
Cell Cycle	G1 phase	Arrest in G1 phase of bladder cancer cell lines	0.0268	0.125					miR-381-3p (and other miRNAs w/seed AUACAAG)	1
Cellular Movement	migration	Migration of duct cancer cell lines	0.0268	0.125					miR-125b-5p (and other miRNAs w/seed CCCUGAG)	1
Cancer,Organismal Injury and Abnormalities	EPCAM positive tumor	EPCAM positive tumor	0.0268	0.125					miR-92a-3p (and other miRNAs w/seed AUUGCAC)	1
Cell-To-Cell Signaling and Interaction,Cellular Function and Maintenance,Hematological System Development and Function,Hematopoiesis,Inflammatory Response	efferocytosis	Efferocytosis of thymocytes	0.0268	0.125					miR-34a-5p (and other miRNAs w/seed GGCAGUG)	1
Cardiovascular System Development and Function,Organ Morphology,Organismal Development	morphology	Morphology of heart	0.0284	0.131					miR-1-3p (and other miRNAs w/seed GGAAUGU),miR-1180-3p (miRNAs w/seed UUCCGGC),miR-1262 (and other miRNAs w/seed UGGGUGA),miR-133a-3p (and other miRNAs w/seed UUGGUCC),miR-184 (and other miRNAs w/seed GGACGGA),miR-214-3p (and other miRNAs w/seed CAGCAGG),miR-26a-5p (and other miRNAs w/seed UCAAGUA),miR-3064-5p (and other miRNAs w/seed CUGGCUG),miR-30c-5p (and other miRNAs w/seed GUAAACA),miR-642a…	11
Gastrointestinal Disease,Hepatic System Disease,Organismal Injury and Abnormalities	cirrhosis	Cirrhosis of liver	0.0307	0.136					miR-100-5p (and other miRNAs w/seed ACCCGUA),miR-130a-3p (and other miRNAs w/seed AGUGCAA),miR-1970 (and other miRNAs w/seed GUGUCAC),miR-671-5p (miRNAs w/seed GGAAGCC)	4
Cell-mediated Immune Response,Cellular Development,Cellular Function and Maintenance,Cellular Growth and Proliferation,Embryonic Development,Hematological System Development and Function,Hematopoiesis,Lymphoid Tissue Structure and Development,Organ Development,Organismal Development,Tissue Development	development	Arrest in development of double-negative T lymphocyte	0.0312	0.136					miR-34a-5p (and other miRNAs w/seed GGCAGUG)	1
Cell Morphology,Organ Morphology,Skeletal and Muscular System Development and Function,Tissue Morphology	area	Area of myofiber	0.0312	0.136					miR-125b-5p (and other miRNAs w/seed CCCUGAG)	1
Cancer,Gastrointestinal Disease,Organismal Injury and Abnormalities	advanced colorectal adenoma	Advanced colorectal adenoma	0.0312	0.136					miR-92a-3p (and other miRNAs w/seed AUUGCAC)	1
Cancer,Cellular Development,Organismal Injury and Abnormalities,Tumor Morphology	differentiation	Differentiation of acute myeloid leukemia blast cells	0.0312	0.136					miR-34a-5p (and other miRNAs w/seed GGCAGUG)	1
Cellular Development,Cellular Growth and Proliferation,Organ Development,Reproductive System Development and Function,Tissue Development	proliferation	Proliferation of ovarian surface epithelial cells	0.0312	0.136					miR-34a-5p (and other miRNAs w/seed GGCAGUG)	1
Cell Cycle,Cell-To-Cell Signaling and Interaction,Hematological System Development and Function,Inflammatory Response	effector phase	Effector phase of natural killer cells	0.0312	0.136					miR-27a-5p (miRNAs w/seed GGGCUUA)	1
Cell Morphology,Cellular Function and Maintenance	autophagy	Autophagy of leukocyte cell lines	0.0312	0.136					miR-125b-5p (and other miRNAs w/seed CCCUGAG)	1
Cellular Development,Cellular Growth and Proliferation	cell proliferation	Cell proliferation of adenocarcinoma cell lines	0.0343	0.149					miR-139-5p (miRNAs w/seed CUACAGU),miR-30a-3p (and other miRNAs w/seed UUUCAGU),miR-34a-5p (and other miRNAs w/seed GGCAGUG)	3
Organismal Functions,Organismal Injury and Abnormalities,Tissue Morphology	closure	Closure of scratch lesion	0.0355	0.151					miR-184 (and other miRNAs w/seed GGACGGA)	1
Cell Morphology	conversion	Conversion of neurons	0.0355	0.151					miR-9-5p (and other miRNAs w/seed CUUUGGU)	1
Cell-To-Cell Signaling and Interaction	responsiveness	Responsiveness of natural killer cells	0.0355	0.151					miR-27a-5p (miRNAs w/seed GGGCUUA)	1
Endocrine System Disorders,Organismal Injury and Abnormalities,Reproductive System Disease	ovarian endometriosis	Ovarian endometriosis	0.0359	0.152					miR-1-3p (and other miRNAs w/seed GGAAUGU),miR-30a-3p (and other miRNAs w/seed UUUCAGU)	2
Cancer,Connective Tissue Disorders,Organismal Injury and Abnormalities,Skeletal and Muscular Disorders	chordoma	Chordoma	0.0379	0.159					miR-125b-5p (and other miRNAs w/seed CCCUGAG),miR-26a-5p (and other miRNAs w/seed UCAAGUA)	2
Inflammatory Disease	chronic inflammatory disorder	Chronic inflammatory disorder	0.039	0.163					miR-100-5p (and other miRNAs w/seed ACCCGUA),miR-130a-3p (and other miRNAs w/seed AGUGCAA),miR-138-5p (miRNAs w/seed GCUGGUG),miR-146b-3p (miRNAs w/seed CCCUGUG),miR-150-3p (miRNAs w/seed UGGUACA),miR-1970 (and other miRNAs w/seed GUGUCAC),miR-27a-5p (miRNAs w/seed GGGCUUA),miR-30c-5p (and other miRNAs w/seed GUAAACA),miR-362-5p (and other miRNAs w/seed AUCCUUG),miR-450b-3p (and other miRNAs w/se…	14
Cell Morphology,Cell-To-Cell Signaling and Interaction,Nervous System Development and Function	plasticity	Plasticity of collateral synapses	0.0399	0.164					miR-3118 (and other miRNAs w/seed GUGACUG)	1
Nervous System Development and Function,Organ Morphology,Tissue Morphology	quantity	Quantity of cortical neurons	0.0399	0.164					miR-409-3p (miRNAs w/seed AAUGUUG)	1
Cellular Development,Cellular Growth and Proliferation,Hematological System Development and Function,Hematopoiesis,Lymphoid Tissue Structure and Development,Tissue Development	granulopoiesis	Granulopoiesis	0.0406	0.166					miR-125b-5p (and other miRNAs w/seed CCCUGAG),miR-196a-5p (and other miRNAs w/seed AGGUAGU),miR-9-5p (and other miRNAs w/seed CUUUGGU)	3
Cellular Development,Cellular Growth and Proliferation	cell proliferation	Cell proliferation of tumor cell lines	0.0418	0.17		-1.227		-1.76	miR-100-5p (and other miRNAs w/seed ACCCGUA),miR-10a-5p (and other miRNAs w/seed ACCCUGU),miR-122-5p (miRNAs w/seed GGAGUGU),miR-125b-5p (and other miRNAs w/seed CCCUGAG),miR-130a-3p (and other miRNAs w/seed AGUGCAA),miR-132-3p (and other miRNAs w/seed AACAGUC),miR-133a-3p (and other miRNAs w/seed UUGGUCC),miR-139-5p (miRNAs w/seed CUACAGU),miR-192-5p (and other miRNAs w/seed UGACCUA),miR-212-5p …	21
Cell Morphology,Organ Morphology,Organismal Injury and Abnormalities,Skeletal and Muscular Disorders,Skeletal and Muscular System Development and Function,Tissue Morphology	muscular hypertrophy	Muscular hypertrophy	0.0421	0.17					miR-1-3p (and other miRNAs w/seed GGAAUGU),miR-133a-3p (and other miRNAs w/seed UUGGUCC),miR-214-3p (and other miRNAs w/seed CAGCAGG),miR-26a-5p (and other miRNAs w/seed UCAAGUA)	4
Cell Morphology,Organ Morphology,Skeletal and Muscular System Development and Function,Tissue Morphology	morphology	Morphology of muscle cells	0.0429	0.17					miR-1-3p (and other miRNAs w/seed GGAAUGU),miR-125b-5p (and other miRNAs w/seed CCCUGAG),miR-133a-3p (and other miRNAs w/seed UUGGUCC),miR-184 (and other miRNAs w/seed GGACGGA),miR-214-3p (and other miRNAs w/seed CAGCAGG),miR-26a-5p (and other miRNAs w/seed UCAAGUA)	6
Cellular Movement	migration	Migration of stomach cancer cell lines	0.0441	0.17					miR-26a-5p (and other miRNAs w/seed UCAAGUA),miR-92a-3p (and other miRNAs w/seed AUUGCAC)	2
Cellular Development,Connective Tissue Development and Function,Embryonic Development,Organismal Development,Tissue Development	differentiation	Differentiation of adipose mesenchymal stem cells	0.0442	0.17					miR-196a-5p (and other miRNAs w/seed AGGUAGU)	1
Cell Morphology,Cellular Function and Maintenance	autophagy	Autophagy of bone marrow-derived macrophages	0.0442	0.17					miR-125b-5p (and other miRNAs w/seed CCCUGAG)	1
Amino Acid Metabolism	quantity	Quantity of L-tyrosine	0.0442	0.17					miR-125b-5p (and other miRNAs w/seed CCCUGAG)	1
Gastrointestinal Disease,Hepatic System Disease,Organismal Injury and Abnormalities	experimentally-induced hepatic fibrosis	Experimentally-induced hepatic fibrosis	0.0442	0.17					miR-30c-5p (and other miRNAs w/seed GUAAACA)	1
Cell Death and Survival,Cellular Development,Cellular Function and Maintenance	self-renewal	Self-renewal of breast cancer cell lines	0.0442	0.17					miR-10a-5p (and other miRNAs w/seed ACCCUGU)	1
Cancer,Cell Morphology,Cellular Function and Maintenance,Organismal Injury and Abnormalities	autophagy	Autophagy of cancer cells	0.0442	0.17					miR-130a-3p (and other miRNAs w/seed AGUGCAA)	1
Cardiovascular Disease,Organismal Injury and Abnormalities,Reproductive System Disease	severe preeclampsia	Severe preeclampsia	0.0452	0.173					miR-1246 (miRNAs w/seed AUGGAUU),miR-26a-5p (and other miRNAs w/seed UCAAGUA)	2
Cellular Development,Embryonic Development	differentiation	Differentiation of embryonic cell lines	0.0462	0.174					miR-125b-5p (and other miRNAs w/seed CCCUGAG),miR-30c-5p (and other miRNAs w/seed GUAAACA),miR-34a-5p (and other miRNAs w/seed GGCAGUG)	3
Hereditary Disorder,Neurological Disease,Organismal Injury and Abnormalities,Psychological Disorders	familial amyotrophic lateral sclerosis	Familial amyotrophic lateral sclerosis	0.0463	0.174					miR-455-3p (miRNAs w/seed CAGUCCA),miR-532-3p (miRNAs w/seed CUCCCAC)	2
Cancer	transformation	Transformation of breast cell lines	0.0463	0.174					miR-132-3p (and other miRNAs w/seed AACAGUC),miR-187-3p (miRNAs w/seed CGUGUCU)	2
Cellular Development,Cellular Growth and Proliferation	proliferation	Proliferation of bladder cancer cell lines	0.0485	0.176					miR-139-5p (miRNAs w/seed CUACAGU),miR-381-3p (and other miRNAs w/seed AUACAAG)	2
Cardiovascular Disease,Connective Tissue Disorders,Dermatological Diseases and Conditions,Immunological Disease,Inflammatory Disease,Organismal Injury and Abnormalities,Skeletal and Muscular Disorders	limited cutaneous systemic sclerosis	Limited cutaneous systemic sclerosis	0.0485	0.176					miR-196a-5p (and other miRNAs w/seed AGGUAGU)	1
Cell Cycle	G1 phase	Arrest in G1 phase of pancreatic cancer cell lines	0.0485	0.176					miR-34a-5p (and other miRNAs w/seed GGCAGUG)	1
Cancer,Hematological Disease,Immunological Disease,Organismal Injury and Abnormalities	chronic lymphocytic leukemia	Aggressive chronic lymphocytic leukemia	0.0485	0.176					miR-125b-5p (and other miRNAs w/seed CCCUGAG)	1
Infectious Diseases	production	Production of Hepatitis C virus	0.0485	0.176					miR-122-5p (miRNAs w/seed GGAGUGU)	1
Behavior	fear memory acquisition	Fear memory acquisition	0.0485	0.176					miR-9-5p (and other miRNAs w/seed CUUUGGU)	1

## Sheet: Supplementary Table 7
Supplementary Table 7. Comparisons between saliva and tissue miRNA significantly altered in HCC versus cirrhosis.
miRNA significant downregulated in HCC saliva and tissuea	miRNA significant downregulated in HCC saliva and upregulated in HCC tissuea
hsa-mir-139	hsa-mir-3180-1					a: Data obtained from NIH Gene Expression Omnibus (GSE74618), previously published by Martinez-Quetglas et al. (2016)(1)
hsa-mir-548i-2	hsa-mir-92b
hsa-mir-548l
